# Supplementary material for: Constraints on Alpine Fault (New Zealand) mylonitization temperatures and the geothermal gradient from Ti-in-quartz thermobarometry
Source: Copernicus journal article supplement (doi:10.5194/se-9-1123-2018), 2018-09-25
Supplement: Supplementary file 1 [file se-9-1123-2018-supplement.zip]

**Supplemental Table 3. Isotopic Analyses and calculated Ti concentrations**

| ID                   | 27Al/30Si  | smean      | 44Ca/30Si  | smean      | 47Ti/30Si  |
|----------------------|------------|------------|------------|------------|------------|
| 77925and52111@1.asc  | 1.35679367 | 0.03038343 | 1.44988768 | 0.00408635 | 3.6719E-05 |
| 77925and52111@2.asc  | 0.00476568 | 7.6487E-05 | 1.42555192 | 0.00400647 | 3.3645E-05 |
| 77925and52111@3.asc  | 0.00606248 | 4.7697E-05 | 1.42518718 | 0.00727129 | 3.0863E-05 |
| 77925and52111@4.asc  | 0.0049137  | 8.2819E-05 | 1.41066472 | 0.0089994  | 2.6838E-05 |
| 77925and52111@5.asc  | 0.00467013 | 0.00010146 | 1.33820891 | 0.00419624 | 2.9741E-05 |
| 77925and52111@7.asc  | 0.00473093 | 5.9764E-05 | 1.40510161 | 0.00513696 | 3.0963E-05 |
| 77925and52111@8.asc  | 0.00550734 | 0.00013088 | 1.39413729 | 0.00328001 | 2.7837E-05 |
| 77925and52111@9.asc  | 0.00478394 | 7.7387E-05 | 1.3864133  | 0.00665731 | 2.2001E-05 |
| 77925and52111@10.asc | 0.00957487 | 0.00025297 | 1.37002124 | 0.00518147 | 2.4401E-05 |
| 77925and52111@11.asc | 0.00539561 | 0.00010002 | 1.45467831 | 0.00372642 | 3.0786E-05 |
| 77925and52111@12.asc | 0.00367429 | 6.7774E-05 | 1.45576352 | 0.00436324 | 8.6516E-06 |
| 77925and52111@13.asc | 0.00611864 | 9.9702E-05 | 1.39441845 | 0.00672675 | 1.2969E-05 |
| 77925and52111@14.asc | 0.00426399 | 6.3291E-05 | 1.37562259 | 0.00410911 | 1.7002E-05 |
| 77925and52111@15.asc | 0.0038939  | 7.8853E-05 | 1.41048493 | 0.00531282 | 1.7184E-05 |
| 77925and52111@16.asc | 0.0054803  | 7.9874E-05 | 1.40907404 | 0.00507308 | 2.0261E-05 |
| 77925and52111@18.asc | 0.00542929 | 8.3757E-05 | 1.40000347 | 0.00381292 | 2.7654E-05 |
| 77925and52111@19.asc | 0.00667227 | 8.0916E-05 | 1.43649252 | 0.00521183 | 1.1754E-05 |
| 77925and52111@20.asc | 0.00699814 | 0.00065311 | 1.3797613  | 0.00647877 | 1.0835E-05 |
| 77925and52111@21.asc | 0.00636727 | 0.00014118 | 1.3749128  | 0.00381474 | 1.7736E-05 |
| 77925and52111@22.asc | 0.00417555 | 5.8822E-05 | 1.42881149 | 0.00381161 | 2.7192E-05 |
| 77925and52111@23.asc | 0.00515505 | 7.486E-05  | 1.38863576 | 0.00523581 | 2.8102E-05 |
| 77925and52111@24.asc | 0.0109528  | 0.0021362  | 1.35555726 | 0.00554233 | 2.4636E-05 |
| 77925and52111@25.asc | 0.00630501 | 9.1275E-05 | 1.3417872  | 0.00449542 | 2.7976E-05 |
| 77925and52111@26.asc | 0.00499357 | 7.825E-05  | 1.32524739 | 0.00416594 | 2.1683E-05 |
| 77925and52111@27.asc | 0.00533025 | 8.0199E-05 | 1.31857795 | 0.00354668 | 2.2765E-05 |
| 77925and52111@28.asc | 0.0055891  | 7.9542E-05 | 1.35575914 | 0.00323306 | 2.2232E-05 |
| 77925and52111@29.asc | 0.00533927 | 8.8434E-05 | 1.26125784 | 0.00423771 | 2.2284E-05 |
| 77925and52111@30.asc | 0.01710548 | 0.00431896 | 1.27364294 | 0.00512257 | 3.1162E-05 |
| 77925and52111@31.asc | 0.0041526  | 6.4816E-05 | 1.3265591  | 0.00722826 | 2.1343E-05 |
| 77925and52111@32.asc | 0.00527207 | 9.6162E-05 | 1.36217361 | 0.00417205 | 2.221E-05  |
| 77925and52111@33.asc | 0.01074545 | 0.00017448 | 1.3333135  | 0.00735645 | 3.1577E-05 |
| 77875and52113@38.asc | 0.00441889 | 6.8133E-05 | 0.00051443 | 2.9551E-05 | 1.9307E-05 |
| 77875and52113@39.asc | 0.00846991 | 0.00062007 | 0.00052727 | 2.4947E-05 | 4.0622E-05 |
| 77875and52113@40.asc | 0.00371162 | 5.6626E-05 | 0.00044477 | 3.8851E-05 | 2.8199E-05 |
| 77875and52113@41.asc | 0.00584549 | 8.2593E-05 | 0.00055892 | 4.1642E-05 | 2.896E-05  |
| 77875and52113@42.asc | 0.01107228 | 8.8677E-05 | 0.0022903  | 7.303E-05  | 2.6643E-05 |
| 77875and52113@43.asc | 0.00496107 | 7.8926E-05 | 0.0005333  | 2.7888E-05 | 3.7083E-05 |
| 77875and52113@44.asc | 0.00530239 | 0.00010912 | 0.00074906 | 3.6946E-05 | 3.0394E-05 |
| 77875and52113@45.asc | 0.14996976 | 0.00056994 | 0.00096468 | 2.7998E-05 | 2.8932E-05 |

|                      |            |            |            |            |            |
|----------------------|------------|------------|------------|------------|------------|
| 77875and52113@46.asc | 0.00502658 | 9.7368E-05 | 0.00049655 | 3.7721E-05 | 1.4345E-05 |
| 77875and52113@47.asc | 0.00424535 | 5.8641E-05 | 0.00045213 | 3.1515E-05 | 2.4339E-05 |
| 77875and52113@48.asc | 0.00752109 | 0.00011936 | 0.00057328 | 2.7057E-05 | 3.3955E-05 |
| 77875and52113@49.asc | 0.00590713 | 5.724E-05  | 0.00051667 | 1.8738E-05 | 3.1976E-05 |
| 77875and52113@50.asc | 0.00535599 | 4.6269E-05 | 0.00045399 | 5.3767E-05 | 3.0514E-05 |
| 77875and52113@52.asc | 0.00366524 | 8.3867E-05 | 0.0004622  | 2.2711E-05 | 2.3648E-05 |
| 77875and52113@53.asc | 0.0050424  | 5.9413E-05 | 0.0004686  | 2.162E-05  | 2.752E-05  |
| 77875and52113@54.asc | 0.00719407 | 6.2434E-05 | 0.00064934 | 4.7326E-05 | 0.00012746 |
| 77875and52113@55.asc | 0.00396511 | 6.3688E-05 | 0.00049471 | 2.2235E-05 | 2.8362E-05 |
| 77875and52113@56.asc | 0.00383541 | 6.4322E-05 | 0.00044931 | 2.1178E-05 | 2.2802E-05 |
| 77875and52113@57.asc | 0.00392909 | 6.4836E-05 | 0.00052102 | 2.6759E-05 | 2.838E-05  |
| 77875and52113@58.asc | 1.44867776 | 0.06334933 | 0.00179741 | 5.5014E-05 | 0.00198012 |
| 77875and52113@59.asc | 0.01972791 | 0.00033349 | 0.00063365 | 4.396E-05  | 6.382E-05  |
| 77875and52113@60.asc | 0.00439469 | 5.2131E-05 | 0.00047033 | 1.5057E-05 | 2.7093E-05 |
| 77875and52113@61.asc | 0.00568456 | 9.0086E-05 | 0.00048735 | 1.9859E-05 | 2.8659E-05 |
| 77875and52113@62.asc | 0.00505146 | 7.1961E-05 | 0.00044205 | 2.2277E-05 | 3.5438E-05 |
| 77875and52113@63.asc | 0.0042282  | 4.317E-05  | 0.00046522 | 2.7118E-05 | 2.8537E-05 |
| 77982and52618@13.asc | 0.004709   | 5.2256E-05 | 0.00052834 | 2.7164E-05 | 2.2677E-05 |
| 77982and52618@14.asc | 0.00467671 | 8.9376E-05 | 0.00052904 | 1.5558E-05 | 1.6738E-05 |
| 77982and52618@15.asc | 0.40342661 | 0.01233733 | 0.00065466 | 1.9927E-05 | 0.00254533 |
| 77982and52618@16.asc | 0.00373411 | 6.7608E-05 | 0.00051862 | 2.0911E-05 | 2.0468E-05 |
| 77982and52618@17.asc | 0.01647469 | 0.00124784 | 0.00061889 | 1.9561E-05 | 5.0175E-05 |
| 77982and52618@18.asc | 0.00673206 | 0.00027397 | 0.00056705 | 1.5957E-05 | 9.5249E-06 |
| 77982and52618@20.asc | 0.00478514 | 0.00014756 | 0.0005328  | 2.5995E-05 | 2.4836E-05 |
| 77982and52618@21.asc | 0.00655977 | 0.0002146  | 0.00060255 | 2.2576E-05 | 3.3499E-05 |
| 77982and52618@22.asc | 0.00840365 | 0.00042414 | 0.00058156 | 1.5094E-05 | 3.5267E-05 |
| 77982and52618@24.asc | 2.39934974 | 0.01858862 | 0.0149018  | 0.00014161 | 2.322E-05  |
| 77982and52618@25.asc | 0.92648148 | 0.00820673 | 0.00784693 | 7.1004E-05 | 2.6839E-05 |
| 77982and52618@26.asc | 0.00323392 | 3.1733E-05 | 0.00055746 | 1.5766E-05 | 2.34E-05   |
| 77982and52618@27.asc | 0.0067712  | 0.00028625 | 0.00061404 | 1.5858E-05 | 2.828E-05  |
| 77982and52618@28.asc | 0.00412544 | 9.4474E-05 | 0.00056083 | 2.0155E-05 | 2.4996E-05 |
| 77982and52618@29.asc | 3.60294293 | 0.03030036 | 0.02241805 | 0.00021422 | 2.3459E-05 |
| 77982and52618@30.asc | 0.00479852 | 0.00023459 | 0.00036558 | 5.2121E-05 | 2.7804E-05 |
| 77821@2.asc          | 0.01290329 | 0.00023263 | 0.00065689 | 4.1053E-05 | 1.1037E-05 |
| 77821@3.asc          | 0.01034246 | 0.00029416 | 0.00050878 | 3.0606E-05 | 1.9572E-05 |
| 77821@4.asc          | 0.00871361 | 0.0003431  | 0.00050679 | 1.7416E-05 | 1.6121E-05 |
| 77821@5.asc          | 0.00894031 | 9.2506E-05 | 0.00050479 | 1.1738E-05 | 1.3179E-05 |
| 77821@6.asc          | 0.01472586 | 0.00015123 | 0.00056484 | 2.1186E-05 | 2.0976E-05 |
| 77821@7.asc          | 0.00454174 | 9.4983E-05 | 0.0004865  | 1.9533E-05 | 1.5619E-05 |
| 77821@8.asc          | 0.00885671 | 0.00029101 | 0.00059229 | 2.8692E-05 | 2.2701E-05 |
| 77821@10.asc         | 0.00511137 | 6.8397E-05 | 0.00048682 | 2.1182E-05 | 3.4169E-05 |
| 77821@11.asc         | 0.0054822  | 0.00012415 | 0.00053339 | 2.3447E-05 | 2.2753E-05 |

|                      |            |            |            |            |            |
|----------------------|------------|------------|------------|------------|------------|
| 77821and77878@2.asc  | 0.00733863 | 0.00016076 | 1.45754588 | 0.00506879 | 9.7355E-06 |
| 77821and77878@3.asc  | 0.0083372  | 0.000233   | 1.47807542 | 0.00477671 | 1.1218E-05 |
| 77821and77878@4.asc  | 0.08836757 | 0.00386042 | 1.41447853 | 0.00428416 | 2.3404E-05 |
| 77875and52113@1.asc  | 0.00556909 | 6.9501E-05 | 0.0004753  | 3.0953E-05 | 3.1078E-05 |
| 77875and52113@2.asc  | 0.00458064 | 6.8928E-05 | 0.00058699 | 3.3019E-05 | 3.0656E-05 |
| 77875and52113@3.asc  | 0.0044694  | 6.2319E-05 | 0.00047232 | 1.8289E-05 | 2.9915E-05 |
| 77875and52113@4.asc  | 0.00431764 | 9.0309E-05 | 0.0004717  | 1.7609E-05 | 2.5999E-05 |
| 77875and52113@5.asc  | 0.00498709 | 0.00010128 | 0.00046152 | 2.1143E-05 | 3.0086E-05 |
| 77875and52113@6.asc  | 0.00558423 | 6.0301E-05 | 0.00050673 | 3.757E-05  | 2.901E-05  |
| 77875and52113@7.asc  | 0.00445809 | 4.6488E-05 | 0.00050021 | 2.3062E-05 | 2.0312E-05 |
| 77875and52113@8.asc  | 0.00593409 | 6.5855E-05 | 0.00045328 | 2.2011E-05 | 3.1916E-05 |
| 77875and52113@9.asc  | 0.00670562 | 0.00032607 | 0.00056153 | 1.749E-05  | 3.385E-05  |
| 77875and52113@10.asc | 0.00278402 | 6.5572E-05 | 0.00046284 | 3.2112E-05 | 2.7964E-05 |
| 77875and52113@11.asc | 0.00387656 | 4.5207E-05 | 0.00050529 | 3.2492E-05 | 2.0823E-05 |
| 77875and52113@12.asc | 0.00650628 | 0.00015367 | 0.00049433 | 2.1573E-05 | 3.0058E-05 |
| 77875and52113@13.asc | 0.0050351  | 0.0001375  | 0.00055091 | 2.4026E-05 | 3.0978E-05 |
| 77875and52113@14.asc | 0.00665905 | 9.2123E-05 | 0.00049244 | 2.5121E-05 | 2.5978E-05 |
| 77875and52113@15.asc | 0.00603151 | 8.3667E-05 | 0.00046362 | 2.1771E-05 | 3.2245E-05 |
| 77875and52113@16.asc | 0.00539195 | 6.4617E-05 | 0.00052606 | 2.8823E-05 | 1.9974E-05 |
| 77875and52113@17.asc | 0.00702492 | 0.0003207  | 0.00049902 | 2.793E-05  | 1.9602E-05 |
| 77875and52113@18.asc | 0.00623157 | 0.00015727 | 0.00060205 | 3.3491E-05 | 2.1138E-05 |
| 77875and52113@19.asc | 0.01006617 | 0.00022724 | 0.000567   | 3.8119E-05 | 2.4127E-05 |
| 77875and52113@20.asc | 0.00429565 | 5.7001E-05 | 0.00046607 | 2.8758E-05 | 1.9567E-05 |
| 77875and52113@21.asc | 0.01097437 | 0.00017294 | 0.00058411 | 2.5901E-05 | 6.0886E-06 |
| 77875and52113@22.asc | 0.00522031 | 8.2947E-05 | 0.00049758 | 2.8262E-05 | 2.6646E-05 |
| 77875and52113@23.asc | 0.01565352 | 0.00159913 | 0.00078061 | 8.033E-05  | 4.4793E-05 |
| 77875and52113@24.asc | 0.00512467 | 7.1992E-05 | 0.00048838 | 2.038E-05  | 4.491E-06  |
| 77875and52113@25.asc | 0.00846299 | 0.0003891  | 0.00056576 | 2.6055E-05 | 1.4423E-05 |
| 77875and52113@26.asc | 0.00362661 | 6.2407E-05 | 0.00052983 | 2.5521E-05 | 4.7945E-06 |
| 77875and52113@27.asc | 0.00655386 | 0.00011627 | 0.00057025 | 2.4923E-05 | 1.0971E-05 |
| 77875and52113@28.asc | 0.00810132 | 7.0809E-05 | 0.00058164 | 3.3009E-05 | 2.4489E-05 |
| 77875and52113@29.asc | 0.00787305 | 5.4333E-05 | 0.00054005 | 2.6029E-05 | 2.8326E-05 |
| 77875and52113@30.asc | 0.0062764  | 0.00015197 | 0.00054777 | 3.0026E-05 | 3.3265E-05 |
| 77875and52113@31.asc | 0.00467768 | 7.5278E-05 | 0.0005347  | 3.208E-05  | 2.7851E-05 |
| 77875and52113@32.asc | 0.00815612 | 4.8913E-05 | 0.00048001 | 2.2135E-05 | 2.1174E-05 |
| 77875and52113@33.asc | 0.00613554 | 9.0452E-05 | 0.00047607 | 2.7563E-05 | 1.496E-05  |
| 77875and52113@34.asc | 0.00341683 | 3.2925E-05 | 0.00046955 | 2.3576E-05 | 1.618E-05  |
| 77875and52113@35.asc | 0.00912902 | 0.00015411 | 0.00051111 | 2.9297E-05 | 2.0314E-05 |
| 77875and52113@36.asc | 0.00703144 | 9.2841E-05 | 0.00052555 | 2.2997E-05 | 1.5129E-05 |
| 77875and52113@37.asc | 0.00500344 | 5.6647E-05 | 0.00046616 | 1.6669E-05 | 2.5326E-05 |
| 77821and77878@7.asc  | 0.00611415 | 7.1445E-05 | 1.42167339 | 0.00392909 | 3.478E-05  |
| 77821and77878@8.asc  | 0.00638285 | 5.973E-05  | 1.38334815 | 0.00334278 | 3.0907E-05 |

|                      |            |            |            |            |            |
|----------------------|------------|------------|------------|------------|------------|
| 77821and77878@9.asc  | 0.00723745 | 7.9442E-05 | 1.40229854 | 0.00599895 | 2.7708E-05 |
| 77821and77878@10.asc | 0.00601605 | 7.2638E-05 | 1.38797221 | 0.00389738 | 2.741E-05  |
| 77821and77878@11.asc | 0.00537314 | 4.7508E-05 | 1.37108836 | 0.00384809 | 2.7108E-05 |
| 77821and77878@12.asc | 0.00542057 | 3.7938E-05 | 1.44265729 | 0.00461365 | 1.2996E-05 |
| 77821and77878@13.asc | 0.00540027 | 5.1012E-05 | 1.39977777 | 0.00500665 | 2.3103E-05 |
| 77821and77878@14.asc | 0.00695034 | 9.7326E-05 | 1.41606907 | 0.00512301 | 2.9987E-05 |
| 77821and77878@15.asc | 0.0054352  | 5.9436E-05 | 1.42231046 | 0.0029008  | 2.6986E-05 |
| 77821and77878@16.asc | 0.00825304 | 9.1603E-05 | 1.42816194 | 0.00455131 | 2.4134E-05 |
| 77821and77878@17.asc | 0.00614781 | 0.00010921 | 1.4676212  | 0.00677947 | 2.3413E-05 |
| 77821and77878@18.asc | 0.00598912 | 6.185E-05  | 1.40951971 | 0.00232763 | 2.1653E-05 |
| 77821and77878@19.asc | 0.00762069 | 0.00010921 | 1.44801957 | 0.007849   | 2.8505E-05 |
| 77821and77878@20.asc | 0.00599005 | 6.2266E-05 | 1.47486505 | 0.00336797 | 3.5666E-05 |
| 77821and77878@21.asc | 0.09468411 | 0.00184971 | 1.4726533  | 0.00628474 | 0.00012085 |
| 77821and77878@24.asc | 0.00723798 | 0.000106   | 1.41375445 | 0.00474038 | 3.4787E-05 |
| 77821and77878@25.asc | 0.00529579 | 6.4881E-05 | 1.38007651 | 0.00507908 | 3.071E-05  |
| 77821and77878@26.asc | 0.36022897 | 0.00113764 | 1.44904078 | 0.00443505 | 0.00020684 |
| 77821and77878@27.asc | 0.00826183 | 5.8028E-05 | 1.4032026  | 0.00686771 | 2.5138E-05 |
| 77821and77878@28.asc | 0.00545668 | 5.4541E-05 | 1.4713509  | 0.0041865  | 2.0272E-05 |
| 77821and77878@29.asc | 0.00542652 | 7.5007E-05 | 1.39196445 | 0.0056175  | 2.3594E-05 |
| 77821and77878@30.asc | 0.00669544 | 8.772E-05  | 1.45524591 | 0.00444511 | 7.6456E-05 |
| 77821and77878@31.asc | 0.00561061 | 5.9483E-05 | 1.38610716 | 0.00549215 | 2.4989E-05 |
| 77821and77878@32.asc | 0.0061759  | 8.4239E-05 | 1.42577632 | 0.00334058 | 2.389E-05  |
| 77821and77878@33.asc | 0.00580855 | 4.0199E-05 | 1.44672019 | 0.00448535 | 2.1199E-05 |
| 77821and77878@34.asc | 0.00586052 | 7.9927E-05 | 1.41916981 | 0.00274164 | 2.1702E-05 |
| 77821and77878@35.asc | 0.00628741 | 0.00014918 | 1.38360132 | 0.00586915 | 1.2901E-05 |
| 77821and77878@36.asc | 0.01349738 | 0.00020526 | 1.48779668 | 0.00454928 | 1.1146E-05 |
| 77821and77878@37.asc | 0.00502867 | 9.9034E-05 | 1.3564342  | 0.00425169 | 9.145E-06  |
| 77821and77878@38.asc | 0.00459862 | 5.7056E-05 | 1.39473758 | 0.0036687  | 2.8048E-05 |
| 77821and77878@39.asc | 0.00458145 | 3.2379E-05 | 1.4155087  | 0.00401223 | 2.1758E-05 |
| 77821and77878@40.asc | 0.00496812 | 5.9725E-05 | 1.3929447  | 0.00562848 | 1.6465E-05 |
| 77821and77878@42.asc | 0.01051803 | 0.00020117 | 1.41545165 | 0.00462312 | 2.185E-05  |
| 77821and77878@44.asc | 0.00775282 | 8.5784E-05 | 1.42452264 | 0.00333031 | 1.7807E-05 |
| 77821and77878@45.asc | 0.00475582 | 7.6843E-05 | 1.48840146 | 0.00343515 | 1.6889E-05 |
| 77821and77878@46.asc | 0.00497786 | 3.7107E-05 | 1.45819673 | 0.00293676 | 1.8168E-05 |
| 77821and77878@47.asc | 0.01410581 | 0.0006911  | 1.41413532 | 0.0043296  | 2.1813E-05 |
| 77821and77878@48.asc | 0.00489259 | 5.9725E-05 | 1.36582466 | 0.00773264 | 2.244E-05  |
| 77821and77878@49.asc | 0.00468563 | 3.4469E-05 | 1.39230386 | 0.00347188 | 2.2451E-05 |
| 77821and77878@50.asc | 0.02553577 | 0.00015365 | 1.42396691 | 0.00415828 | 0.00013441 |
| 77821and77878@51.asc | 0.00730289 | 8.2445E-05 | 1.40113731 | 0.00301318 | 3.4061E-05 |
| 77821and77878@52.asc | 0.00499729 | 0.00011697 | 1.46027919 | 0.004924   | 2.673E-05  |
| 77821and77878@53.asc | 0.00469524 | 6.9664E-05 | 1.46923498 | 0.00298669 | 2.0717E-05 |
| 77821and77878@54.asc | 0.00613771 | 5.1076E-05 | 1.39169978 | 0.00376281 | 2.4456E-05 |

|                      |            |            |            |            |            |
|----------------------|------------|------------|------------|------------|------------|
| 77821and77878@55.asc | 0.00543095 | 4.7891E-05 | 1.47754239 | 0.00503489 | 1.3756E-05 |
| 77821and77878@56.asc | 0.01369146 | 0.00018787 | 1.38611865 | 0.00388989 | 2.5065E-05 |
| 77821and77878@57.asc | 0.01363896 | 0.00021168 | 1.38849554 | 0.0045358  | 1.0962E-05 |
| 77821and77878@58.asc | 0.00843421 | 0.00014655 | 1.35064176 | 0.00304619 | 1.8907E-05 |
| 77913and77886@22.asc | 0.00225995 | 7.3774E-05 | 0.0006148  | 2.6949E-05 | 2.138E-05  |
| 77913and77886@23.asc | 0.01942312 | 0.00072162 | 0.00132455 | 2.996E-05  | 3.0669E-05 |
| 77913and77886@24.asc | 0.0222917  | 0.00052561 | 0.00124481 | 6.2118E-05 | 3.343E-05  |
| 77913and77886@25.asc | 0.53089169 | 0.00413731 | 0.00442763 | 7.1859E-05 | 2.8137E-05 |
| 77913and77886@26.asc | 0.00435101 | 0.00012087 | 0.00063196 | 2.2078E-05 | 2.8324E-05 |
| 77913and77886@27.asc | 0.00368175 | 0.00010437 | 0.00055754 | 2.9827E-05 | 2.1198E-05 |
| 77913and77886@28.asc | 0.00751713 | 0.00018478 | 0.00068476 | 3.1465E-05 | 2.534E-05  |
| 77913and77886@29.asc | 0.00421107 | 0.00010171 | 0.0006071  | 2.268E-05  | 2.0428E-05 |
| 77913and77886@30.asc | 0.00357416 | 5.0373E-05 | 0.00061028 | 3.3256E-05 | 2.2211E-05 |
| 77913and77886@31.asc | 0.00440591 | 7.8496E-05 | 0.00078812 | 3.7119E-05 | 1.8734E-05 |
| 77913and77886@32.asc | 0.00317129 | 6.6798E-05 | 0.0005771  | 1.4109E-05 | 2.6083E-05 |
| 77913and77886@33.asc | 0.00382184 | 5.0705E-05 | 0.00056366 | 4.1983E-05 | 2.4298E-05 |
| 77913and77886@34.asc | 0.00832543 | 9.9487E-05 | 0.00059945 | 2.9075E-05 | 2.3833E-05 |
| 77913and77886@35.asc | 0.0051513  | 0.00010549 | 0.00066558 | 2.4359E-05 | 2.434E-05  |
| 77913and77886@36.asc | 0.00438703 | 7.2908E-05 | 0.00058429 | 3.7613E-05 | 2.6795E-05 |
| 77913and77886@37.asc | 0.00589819 | 0.00027474 | 0.0006478  | 3.4673E-05 | 3.3042E-05 |
| 77913and77886@38.asc | 0.00304461 | 6.9708E-05 | 0.00063623 | 2.8186E-05 | 1.8634E-05 |
| 77913and77886@39.asc | 0.00873699 | 0.00038408 | 0.00067504 | 3.3362E-05 | 2.4386E-05 |
| 77913and77886@40.asc | 0.00382613 | 9.2273E-05 | 0.00061396 | 2.7668E-05 | 2.8348E-05 |
| 77913and77886@41.asc | 0.00508828 | 0.00011757 | 0.00080619 | 4.8496E-05 | 3.5832E-05 |
| 77913and77886@42.asc | 0.00429149 | 9.6841E-05 | 0.00072285 | 4.6729E-05 | 3.3839E-05 |
| 77913and77886@43.asc | 0.00402068 | 0.00011754 | 0.00070842 | 5.1467E-05 | 3.5332E-05 |
| 77913and77886@44.asc | 0.02725664 | 0.00303189 | 0.00091933 | 7.1064E-05 | 3.6028E-05 |
| 77913and77886@45.asc | 0.00529447 | 9.3915E-05 | 0.00071879 | 5.5684E-05 | 3.0767E-05 |
| 77913and77886@46.asc | 0.00410867 | 8.6462E-05 | 0.0008741  | 0.00010263 | 2.873E-05  |
| 77913and77886@47.asc | 0.00439856 | 4.9299E-05 | 0.00076656 | 5.4936E-05 | 2.9328E-05 |
| 77913and77886@48.asc | 0.01684724 | 0.00114155 | 0.00099621 | 6.5325E-05 | 3.7813E-05 |
| 77913and77886@49.asc | 0.01092632 | 0.0005199  | 0.00093639 | 5.6365E-05 | 3.025E-05  |
| 77913and77886@50.asc | 0.0041084  | 0.00010031 | 0.00084528 | 7.6762E-05 | 2.1027E-05 |
| 77913and77886@51.asc | 0.00343148 | 6.8691E-05 | 0.00083919 | 8.7072E-05 | 1.4295E-05 |
| 77913and77886@52.asc | 0.00263831 | 0.00010231 | 0.00066849 | 4.6103E-05 | 2.4202E-05 |
| 77913and77886@54.asc | 0.00913245 | 0.00022128 | 0.00073946 | 4.7011E-05 | 2.3044E-05 |
| 77913and77886@55.asc | 0.00476425 | 0.00016225 | 0.0006407  | 5.0681E-05 | 1.1653E-05 |
| 77913and77886@56.asc | 0.00303433 | 8.4647E-05 | 0.00070009 | 4.3718E-05 | 1.8035E-05 |
| 77913and77886@57.asc | 0.00963077 | 0.0002309  | 0.00075561 | 4.0407E-05 | 4.1039E-05 |
| 78171and77887@37.asc | 0.00514063 | 0.00017117 | 0.00057687 | 1.8997E-05 | 2.6223E-05 |
| 78171and77887@38.asc | 0.00340835 | 6.3804E-05 | 0.00069151 | 3.6586E-05 | 3.6435E-05 |
| 78171and77887@39.asc | 0.00631947 | 0.00026992 | 0.00136571 | 5.7449E-05 | 3.1012E-05 |

|                      |            |            |            |            |            |
|----------------------|------------|------------|------------|------------|------------|
| 78171and77887@40.asc | 0.00902705 | 0.00014048 | 0.00082923 | 0.00012396 | 3.8669E-05 |
| 78171and77887@41.asc | 0.00325803 | 0.0001364  | 0.00083294 | 0.00011681 | 1.9344E-05 |
| 78171and77887@42.asc | 0.00279626 | 4.5272E-05 | 0.00069222 | 0.00012294 | 2.4923E-05 |
| 78171and77887@43.asc | 0.00648371 | 0.00200444 | 0.00049049 | 6.0504E-05 | 2.5972E-05 |
| 78171and77887@44.asc | 0.00342589 | 0.00011126 | 0.00054375 | 3.5589E-05 | 2.4667E-05 |
| 78171and77887@45.asc | 0.00244963 | 3.3397E-05 | 0.0004784  | 2.8473E-05 | 2.1256E-05 |
| 78171and77887@46.asc | 0.00340617 | 0.00016189 | 0.00049859 | 1.9257E-05 | 2.4854E-05 |
| 78171and77887@47.asc | 0.00242958 | 5.6069E-05 | 0.00049622 | 2.4063E-05 | 2.2914E-05 |
| 78171and77887@48.asc | 0.01795619 | 0.00121806 | 0.00065884 | 3.0487E-05 | 1.1024E-05 |
| 78171and77887@49.asc | 0.00566515 | 6.0929E-05 | 0.00062304 | 2.7075E-05 | 9.079E-06  |
| 78171and77887@50.asc | 0.0050522  | 0.00080738 | 0.00062305 | 5.9034E-05 | 2.1492E-05 |
| 78171and77887@51.asc | 0.00472236 | 8.4609E-05 | 0.0006153  | 2.0881E-05 | 2.2227E-05 |
| 78171and77887@52.asc | 0.00477093 | 8.6175E-05 | 0.00056621 | 1.7975E-05 | 2.7365E-05 |
| 78171and77887@53.asc | 0.00400739 | 4.8846E-05 | 0.00048384 | 2.3022E-05 | 2.751E-05  |
| 78171and77887@54.asc | 0.00409347 | 6.0342E-05 | 0.00048011 | 3.0431E-05 | 2.6024E-05 |
| 78171and77887@56.asc | 0.00254562 | 7.4277E-05 | 0.00051646 | 1.5262E-05 | 2.3578E-05 |
| 78171and77887@57.asc | 0.00378151 | 4.1446E-05 | 0.00053704 | 2.2348E-05 | 2.3525E-05 |
| 78171and77887@58.asc | 0.00491165 | 0.00010828 | 0.00051033 | 2.2155E-05 | 3.2321E-05 |
| 78171and77887@59.asc | 0.00308455 | 4.948E-05  | 0.00044933 | 1.4681E-05 | 2.6471E-05 |
| 78171and77887@60.asc | 0.00441709 | 6.6584E-05 | 0.00048699 | 1.993E-05  | 2.645E-05  |
| 78171and77887@61.asc | 0.00923849 | 0.0002341  | 0.00070831 | 3.4371E-05 | 2.2056E-05 |
| 78171and77887@63.asc | 0.01304813 | 0.00119582 | 0.00453954 | 0.00087878 | 5.6992E-05 |
| 78171and77887@64.asc | 0.0030453  | 5.1653E-05 | 0.00045558 | 2.1938E-05 | 2.5095E-05 |
| 78171and77887@65.asc | 0.00287533 | 3.1098E-05 | 0.00042474 | 2.1984E-05 | 2.4969E-05 |
| 78171and77887@66.asc | 0.00416039 | 7.1065E-05 | 0.00051528 | 2.8151E-05 | 2.0262E-05 |
| 78171and77887@67.asc | 0.00359012 | 5.4577E-05 | 0.00049834 | 1.9851E-05 | 2.3392E-05 |
| 78171and77887@68.asc | 0.00249452 | 3.3848E-05 | 0.00042197 | 3.1795E-05 | 2.068E-05  |
| 78171and77887@69.asc | 0.00263519 | 3.7836E-05 | 0.00050076 | 1.4977E-05 | 2.4942E-05 |
| 78171and77887@70.asc | 0.00380729 | 9.796E-05  | 0.00051568 | 2.3686E-05 | 2.3912E-05 |
| 78171and77887@71.asc | 0.03249637 | 0.00063054 | 0.00047527 | 1.7308E-05 | 2.1322E-05 |
| 78171and77887@72.asc | 0.00272014 | 5.5412E-05 | 0.00050428 | 2.8389E-05 | 2.1357E-05 |
| 77900@1.asc          | 0.00690404 | 0.00020618 | 0.00063419 | 3.4745E-05 | 3.8767E-05 |
| 77900@2.asc          | 0.00497532 | 5.2908E-05 | 0.00059718 | 1.7975E-05 | 3.899E-05  |
| 77900@4.asc          | 0.00379111 | 7.8722E-05 | 0.00056837 | 2.5152E-05 | 2.8937E-05 |
| 77900@5.asc          | 0.00355798 | 7.8572E-05 | 0.00060661 | 2.5166E-05 | 3.3853E-05 |
| 77900@6.asc          | 0.01335509 | 0.0004719  | 0.00091628 | 4.0579E-05 | 5.7488E-05 |
| 77900@7.asc          | 0.12107579 | 0.00161347 | 0.00061621 | 3.694E-05  | 0.00017333 |
| 77900@9.asc          | 0.00424209 | 8.0869E-05 | 0.00055974 | 4.0258E-05 | 2.6159E-05 |
| 77900@10.asc         | 0.01456057 | 0.00127191 | 0.00096928 | 8.9617E-05 | 5.4429E-05 |
| 77900@11.asc         | 0.00355024 | 8.6115E-05 | 0.00053125 | 2.595E-05  | 2.9838E-05 |
| 77900@12.asc         | 0.00428288 | 7.2509E-05 | 0.00060981 | 3.4542E-05 | 3.7378E-05 |
| 77900@13.asc         | 0.00507691 | 7.1762E-05 | 0.00058378 | 2.9771E-05 | 3.8685E-05 |

|              |            |            |            |            |            |
|--------------|------------|------------|------------|------------|------------|
| 77900@14.asc | 0.00381955 | 9.8792E-05 | 0.00057313 | 2.1589E-05 | 3.0903E-05 |
| 77900@15.asc | 0.00373992 | 4.5365E-05 | 0.00055306 | 1.4355E-05 | 3.4875E-05 |
| 77900@16.asc | 0.00437996 | 7.4569E-05 | 0.00060944 | 1.9713E-05 | 3.2776E-05 |
| 77900@17.asc | 0.00366293 | 3.7506E-05 | 0.00057127 | 2.6737E-05 | 3.4287E-05 |
| 77900@18.asc | 0.01051596 | 0.00040753 | 0.00069016 | 2.3268E-05 | 3.6929E-05 |
| 77900@19.asc | 0.00642077 | 7.9605E-05 | 0.00061143 | 3.2655E-05 | 3.4507E-05 |
| 77900@20.asc | 0.00536298 | 8.1713E-05 | 0.00061681 | 1.9373E-05 | 3.308E-05  |
| 77900@21.asc | 0.0048591  | 5.9812E-05 | 0.00057309 | 2.5035E-05 | 3.5069E-05 |
| 77900@22.asc | 0.00797471 | 0.00032796 | 0.00066451 | 3.1473E-05 | 3.9587E-05 |
| 77900@23.asc | 0.00468398 | 9.9139E-05 | 0.00055912 | 1.6397E-05 | 3.2298E-05 |
| 77900@24.asc | 0.00441707 | 8.1542E-05 | 0.00057216 | 2.3977E-05 | 3.2236E-05 |
| 77900@25.asc | 0.00423665 | 4.8371E-05 | 0.00056773 | 4.0304E-05 | 3.4009E-05 |
| 77900@26.asc | 0.00558717 | 0.00014715 | 0.00068872 | 2.828E-05  | 8.0866E-05 |
| 77900@27.asc | 0.00609064 | 0.00028051 | 0.00056438 | 2.2272E-05 | 3.4823E-05 |
| 77900@28.asc | 0.00790588 | 0.00011172 | 0.0006382  | 3.5272E-05 | 3.6173E-05 |
| 77900@29.asc | 0.33434762 | 0.00374375 | 0.01182111 | 0.0001862  | 6.4582E-05 |
| 77900@30.asc | 0.01337237 | 0.00020544 | 0.00081529 | 2.0612E-05 | 4.1086E-05 |
| 77900@31.asc | 0.00438229 | 8.459E-05  | 0.0005799  | 3.5684E-05 | 3.4863E-05 |
| 77900@32.asc | 0.00543094 | 7.8673E-05 | 0.00065161 | 2.5768E-05 | 4.4151E-05 |
| 77900@33.asc | 0.00989591 | 0.00017404 | 0.00064541 | 3.7313E-05 | 4.4227E-05 |
| 77900@34.asc | 0.00408873 | 7.8063E-05 | 0.00074515 | 4.8679E-05 | 3.8236E-05 |
| 77900@35.asc | 0.00480936 | 5.8179E-05 | 0.0006001  | 3.1566E-05 | 4.0611E-05 |
| 77900@36.asc | 0.00474956 | 6.271E-05  | 0.0006084  | 3.8506E-05 | 3.7007E-05 |
| 77900@37.asc | 0.00418287 | 8.0154E-05 | 0.00061346 | 1.8206E-05 | 3.4122E-05 |
| 77900@38.asc | 0.00581161 | 8.9159E-05 | 0.00063666 | 2.2921E-05 | 2.0533E-05 |
| 77900@39.asc | 0.00349417 | 4.8717E-05 | 0.00058931 | 2.4222E-05 | 3.1044E-05 |
| 77900@40.asc | 0.00815283 | 0.00045253 | 0.0006486  | 3.3457E-05 | 3.0875E-05 |
| 77900@41.asc | 0.00588247 | 0.00015078 | 0.00063804 | 4.7925E-05 | 4.1329E-05 |
| 77900@42.asc | 0.00917555 | 0.00031272 | 0.00076413 | 3.4641E-05 | 3.2865E-05 |
| 77900@43.asc | 0.00491955 | 4.3313E-05 | 0.00052845 | 2.242E-05  | 3.7219E-05 |
| 77900@44.asc | 0.00514262 | 9.0835E-05 | 0.00059786 | 2.7072E-05 | 3.6303E-05 |
| 77900@45.asc | 0.00374003 | 6.5203E-05 | 0.00060412 | 2.5165E-05 | 3.3764E-05 |
| 77900@46.asc | 0.00585143 | 9.7313E-05 | 0.00061478 | 2.4373E-05 | 3.1816E-05 |
| 77900@47.asc | 0.00559897 | 0.0001713  | 0.00066817 | 3.0581E-05 | 3.6219E-05 |
| 77900@48.asc | 0.00436842 | 9.9801E-05 | 0.00060818 | 2.4025E-05 | 3.9381E-05 |
| 77900@49.asc | 0.09790342 | 0.00100572 | 0.00059399 | 4.1546E-05 | 8.8636E-05 |
| 77900@50.asc | 0.00487745 | 9.2772E-05 | 0.00061452 | 2.9999E-05 | 1.8508E-05 |
| 77900@51.asc | 0.00483371 | 5.4146E-05 | 0.0006132  | 2.5143E-05 | 3.2329E-05 |
| 77900@52.asc | 0.00353048 | 8.7963E-05 | 0.00055437 | 2.7099E-05 | 3.4624E-05 |
| 77900@56.asc | 0.00422992 | 5.7085E-05 | 0.00062513 | 2.7363E-05 | 3.8909E-05 |
| 77900@57.asc | 0.00495746 | 0.00018413 | 0.00059813 | 2.8907E-05 | 3.3241E-05 |
| 77900@58.asc | 0.0043671  | 7.845E-05  | 0.00059702 | 2.3913E-05 | 3.296E-05  |

|                      |            |            |            |            |            |
|----------------------|------------|------------|------------|------------|------------|
| 77900@59.asc         | 0.33930933 | 0.00836043 | 0.00416242 | 8.3292E-05 | 4.7587E-05 |
| 77900@60.asc         | 0.00443532 | 9.0637E-05 | 0.00065866 | 3.897E-05  | 3.8452E-05 |
| 77900@62.asc         | 0.00436958 | 5.4872E-05 | 0.00061907 | 3.7249E-05 | 3.6394E-05 |
| 77900@65.asc         | 0.00516672 | 7.5231E-05 | 0.00058648 | 3.3027E-05 | 0.00010158 |
| 77900@66.asc         | 0.01973089 | 0.00091938 | 0.00109583 | 6.5015E-05 | 7.9417E-05 |
| 77900@67.asc         | 0.00887085 | 0.00012964 | 0.00063514 | 2.683E-05  | 3.7767E-05 |
| 77900@68.asc         | 0.00500131 | 6.8875E-05 | 0.00058991 | 3.3124E-05 | 3.7629E-05 |
| 77900@69.asc         | 0.00501575 | 5.8504E-05 | 0.000574   | 2.4233E-05 | 3.9368E-05 |
| 77900@70.asc         | 0.00676657 | 8.5124E-05 | 0.00058592 | 2.5769E-05 | 4.5173E-05 |
| 77900@71.asc         | 0.00635311 | 0.00010491 | 0.00067274 | 3.2549E-05 | 4.3262E-05 |
| 77900@72.asc         | 0.00654393 | 8.8645E-05 | 0.00066279 | 2.0624E-05 | 3.8811E-05 |
| 77900@75.asc         | 0.05312068 | 0.00146219 | 0.00062242 | 2.6379E-05 | 7.6222E-05 |
| 77900@76.asc         | 0.01576425 | 0.00052393 | 0.00061517 | 4.0556E-05 | 4.0082E-05 |
| 77911and78169@47.asc | 0.00719927 | 0.00038015 | 0.00096041 | 3.4706E-05 | 4.13E-05   |
| 77911and78169@48.asc | 0.00705508 | 0.0001668  | 0.00067773 | 2.9247E-05 | 1.6141E-05 |
| 77911and78169@49.asc | 0.00491622 | 5.5009E-05 | 0.00069477 | 2.4675E-05 | 1.5608E-05 |
| 77911and78169@50.asc | 0.00455087 | 0.00010279 | 0.00071856 | 3.8476E-05 | 2.6423E-05 |
| 77911and78169@51.asc | 0.00422791 | 0.00023802 | 0.00066351 | 2.9498E-05 | 2.7584E-05 |
| 77911test1.asc       | 0.00317637 | 5.8161E-05 | 0.00057646 | 1.8393E-05 | 2.6512E-05 |
| 77911and78169@1.asc  | 0.03069855 | 0.00227032 | 0.0033383  | 0.00099515 | 8.6097E-05 |
| 77911and78169@2.asc  | 0.00479678 | 4.0636E-05 | 0.00056409 | 2.7892E-05 | 1.6417E-05 |
| 77911and78169@3.asc  | 0.01968042 | 0.00156243 | 0.00311184 | 0.00074597 | 5.5076E-05 |
| 77911and78169@5.asc  | 0.01554644 | 0.00143909 | 0.00076016 | 4.8938E-05 | 4.6835E-05 |
| 77911and78169@6.asc  | 0.57584067 | 0.01199111 | 0.00271265 | 6.0935E-05 | 1.6701E-05 |
| 77911and78169@7.asc  | 0.00695107 | 0.00038537 | 0.00060595 | 2.2941E-05 | 2.2826E-05 |
| 78182and77912@1.asc  | 0.00340764 | 9.2202E-05 | 0.00064562 | 3.3294E-05 | 1.3059E-05 |
| 78182and77912@2.asc  | 0.00532433 | 3.9895E-05 | 0.0005543  | 1.3709E-05 | 1.821E-05  |
| 78182and77912@4.asc  | 0.04094148 | 0.00125399 | 0.00065217 | 2.4112E-05 | 0.00015794 |
| 78182and77912@5.asc  | 0.00456761 | 5.3723E-05 | 0.00056429 | 2.1804E-05 | 3.5967E-05 |
| 78182and77912@6.asc  | 0.00791841 | 0.00021639 | 0.00060003 | 3.7791E-05 | 0.00048652 |
| 78182and77912@7.asc  | 0.0028326  | 6.8326E-05 | 0.00054375 | 3.3939E-05 | 1.4228E-05 |
| 78182and77912@8.asc  | 0.00299146 | 2.7794E-05 | 0.00052422 | 1.8423E-05 | 3.2697E-05 |
| 78182and77912@9.asc  | 0.00792667 | 0.00034224 | 0.00070283 | 3.8206E-05 | 1.9242E-05 |
| 78182and77912@10.asc | 0.00343244 | 5.7492E-05 | 0.00055956 | 2.1588E-05 | 3.7304E-05 |
| 78182and77912@12.asc | 0.01180743 | 0.00015197 | 0.00059832 | 2.075E-05  | 9.548E-06  |
| 78182and77912@13.asc | 0.05992344 | 0.0006112  | 0.00062001 | 3.3894E-05 | 9.1174E-05 |
| 78182and77912@14.asc | 0.35151174 | 0.00498472 | 0.00070434 | 4.3726E-05 | 0.00020432 |
| 78182and77912@15.asc | 0.00722676 | 0.00010879 | 0.00057368 | 2.2371E-05 | 2.8221E-05 |
| 78182and77912@18.asc | 0.00722239 | 0.0001868  | 0.00052964 | 3.1415E-05 | 1.0466E-05 |
| 78182and77912@19.asc | 0.00651218 | 0.00013842 | 0.00049952 | 1.6746E-05 | 1.6498E-05 |
| 78182and77912@20.asc | 0.01017608 | 0.00014021 | 0.00052527 | 2.8141E-05 | 2.1437E-05 |
| 78182and77912@21.asc | 0.00311104 | 3.7449E-05 | 0.00050525 | 1.998E-05  | 4.0012E-05 |



|                      |            |            |            |            |            |
|----------------------|------------|------------|------------|------------|------------|
| 78182and77912@22.asc | 0.00535681 | 6.8232E-05 | 0.00051477 | 2.2263E-05 | 3.533E-05  |
| 78182and77912@23.asc | 0.00756302 | 0.00014402 | 0.00055016 | 2.0326E-05 | 2.5578E-05 |
| 78182and77912@24.asc | 0.00814568 | 0.0002486  | 0.00052917 | 1.989E-05  | 2.2115E-05 |
| 78182and77912@25.asc | 0.01616812 | 0.01079455 | 0.00045066 | 5.2748E-05 | 2.6558E-05 |
| 78182and77912@26.asc | 0.00534596 | 0.00012242 | 0.00063953 | 1.9534E-05 | 9.7425E-06 |
| 78182and77912@27.asc | 0.00637131 | 9.326E-05  | 0.00055352 | 1.8599E-05 | 2.6264E-05 |
| 78182and77912@28.asc | 0.00949082 | 0.00019102 | 0.00060168 | 2.053E-05  | 1.4534E-05 |
| 78182and77912@30.asc | 0.01061811 | 0.00037203 | 0.00060758 | 4.3688E-05 | 1.125E-05  |
| 77913and77886@8.asc  | 0.03755549 | 0.00100642 | 0.00069243 | 3.9426E-05 | 3.2649E-05 |
| 77913and77886@9.asc  | 0.00389587 | 8.0341E-05 | 0.00059568 | 1.9755E-05 | 1.7258E-05 |
| 77913and77886@10.asc | 0.1246368  | 0.00177646 | 0.00166793 | 7.343E-05  | 2.249E-05  |
| 77913and77886@11.asc | 2.31722401 | 0.01151957 | 0.02282449 | 0.00022149 | 1.6523E-05 |
| 77913and77886@12.asc | 0.00274528 | 4.6703E-05 | 0.00060133 | 2.778E-05  | 2.9455E-05 |
| 77913and77886@13.asc | 0.00677299 | 0.00015973 | 0.00066606 | 3.6033E-05 | 1.3775E-05 |
| 77913and77886@14.asc | 0.00393672 | 6.828E-05  | 0.00056548 | 2.1115E-05 | 3.1537E-05 |
| 77913and77886@15.asc | 0.05700674 | 0.00051135 | 0.00609841 | 0.00011776 | 3.2819E-05 |
| 77913and77886@16.asc | 1.86684191 | 0.0146793  | 0.01820689 | 0.00016033 | 2.9852E-05 |
| 77913and77886@17.asc | 0.00667235 | 0.00017158 | 0.00064814 | 3.6185E-05 | 2.0894E-05 |
| 77913and77886@18.asc | 0.00325668 | 5.5277E-05 | 0.00057211 | 3.3946E-05 | 2.7422E-05 |
| 77913and77886@19.asc | 0.00346962 | 5.2515E-05 | 0.00060013 | 2.915E-05  | 3.0053E-05 |
| 77913and77886@20.asc | 0.00376286 | 9.5397E-05 | 0.00062216 | 2.5308E-05 | 2.7085E-05 |
| 77913and77886@21.asc | 0.00465115 | 0.00010024 | 0.00056637 | 2.6214E-05 | 1.9705E-05 |
| 77915area2@1.asc     | 0.00481087 | 0.00030807 | 0.0009429  | 4.7418E-05 | 1.8258E-05 |
| 77915area2@2.asc     | 0.01577377 | 0.00042049 | 0.00092258 | 3.2382E-05 | 2.0285E-05 |
| 77915area2@3.asc     | 0.00305228 | 5.9383E-05 | 0.00087174 | 3.5696E-05 | 1.79E-05   |
| 77915area2@5.asc     | 0.00863308 | 0.0001247  | 0.00076913 | 2.5231E-05 | 3.0485E-05 |
| 77915area2@6.asc     | 0.00322671 | 3.1105E-05 | 0.00059982 | 1.7207E-05 | 1.7151E-05 |
| 77915area2@7.asc     | 0.00245284 | 5.2785E-05 | 0.00057959 | 2.6862E-05 | 2.4335E-05 |
| 77915area2@8.asc     | 0.0043424  | 0.00010019 | 0.00057372 | 2.6992E-05 | 2.2305E-05 |
| 77915and77921@1.asc  | 0.00887262 | 0.00016372 | 0.00089139 | 3.142E-05  | 1.1932E-05 |
| 77915and77921@2.asc  | 0.00459358 | 2.9429E-05 | 0.00087241 | 2.3293E-05 | 1.3016E-05 |
| 77915and77921@3.asc  | 0.00515719 | 0.00012961 | 0.00088306 | 2.9713E-05 | 1.6043E-05 |
| 77915and77921@4.asc  | 0.00852572 | 0.00027268 | 0.0009546  | 3.2935E-05 | 1.2753E-05 |
| 77915and77921@5.asc  | 0.00337334 | 7.5915E-05 | 0.00086707 | 2.8707E-05 | 1.0137E-05 |
| 77915and77921@6.asc  | 0.01308984 | 0.00136157 | 0.00129865 | 4.1855E-05 | 2.2605E-05 |
| 77915and77921@7.asc  | 0.00877717 | 0.00068152 | 0.0009889  | 4.7526E-05 | 2.8474E-05 |
| 77915and77921@8.asc  | 0.00415347 | 8.6341E-05 | 0.00094894 | 3.7231E-05 | 1.1009E-05 |
| 77915and77921@9.asc  | 0.00953287 | 0.00018361 | 0.00099956 | 2.1723E-05 | 1.3882E-05 |
| 77915and77921@10.asc | 0.00389577 | 4.1532E-05 | 0.0009043  | 2.2087E-05 | 9.9131E-06 |
| 77915and77921@11.asc | 0.00371912 | 8.7493E-05 | 0.00084368 | 2.3195E-05 | 1.4847E-05 |
| 77915and77921@12.asc | 0.0037113  | 9.7601E-05 | 0.00086303 | 4.3099E-05 | 1.6702E-05 |
| 77915and77921@13.asc | 0.00330692 | 4.9553E-05 | 0.0021347  | 3.7246E-05 | 1.4012E-05 |

|                      |            |            |            |            |            |
|----------------------|------------|------------|------------|------------|------------|
| 77915and77921@14.asc | 0.01111705 | 0.00017924 | 0.00098697 | 2.5713E-05 | 1.7875E-05 |
| 77915and77921@15.asc | 0.00445243 | 9.9721E-05 | 0.00087681 | 1.8939E-05 | 2.0405E-05 |
| 77915and77921@16.asc | 0.0039935  | 7.9007E-05 | 0.00083408 | 2.6064E-05 | 1.3083E-05 |
| 77915and77921@17.asc | 0.00633416 | 0.00036247 | 0.00088495 | 2.5964E-05 | 8.5201E-05 |
| 77920and77930@22.asc | 0.00364484 | 9.7357E-05 | 0.0005072  | 2.0768E-05 | 2.3941E-05 |
| 77920and77930@23.asc | 0.00399789 | 4.9517E-05 | 0.00054247 | 1.2603E-05 | 2.7269E-05 |
| 77920and77930@24.asc | 0.00958875 | 0.00023894 | 0.00062813 | 1.9862E-05 | 2.2056E-05 |
| 77920and77930@25.asc | 0.00332299 | 4.8646E-05 | 0.00050816 | 1.5908E-05 | 2.7188E-05 |
| 77920and77930@26.asc | 0.00218115 | 7.3462E-05 | 0.00046993 | 2.1684E-05 | 1.8035E-05 |
| 77920and77930@27.asc | 0.06370551 | 0.00290229 | 0.0007041  | 2.2897E-05 | 1.4134E-05 |
| 77920and77930@28.asc | 0.00252641 | 4.8862E-05 | 0.00051062 | 1.7652E-05 | 1.9508E-05 |
| 77920and77930@29.asc | 0.00364763 | 6.5266E-05 | 0.00051853 | 2.6496E-05 | 2.2039E-05 |
| 77920and77930@30.asc | 0.00402467 | 0.00035129 | 0.00055312 | 2.511E-05  | 2.1214E-05 |
| 77920and77930@31.asc | 1.42189494 | 0.02537333 | 0.00759715 | 0.00024316 | 0.00013226 |
| 77920and77930@33.asc | 0.39400946 | 0.00451063 | 0.00408436 | 8.8175E-05 | 2.2126E-05 |
| 77920and77930@34.asc | 0.00291823 | 5.0246E-05 | 0.00051165 | 2.2634E-05 | 2.4801E-05 |
| 77920and77930@35.asc | 0.1373062  | 0.00276352 | 0.00173344 | 3.2961E-05 | 2.5911E-05 |
| 77920and77930@1.asc  | 0.0026842  | 5.1521E-05 | 0.00056386 | 3.1764E-05 | 1.4327E-05 |
| 77920and77930@2.asc  | 0.00708827 | 8.0148E-05 | 0.00070971 | 2.1827E-05 | 1.7157E-05 |
| 77920and77930@3.asc  | 0.00223453 | 0.00010252 | 0.00050812 | 2.5874E-05 | 2.2008E-05 |
| 77920and77930@4.asc  | 0.0034589  | 0.00010748 | 0.00051744 | 2.2963E-05 | 7.8513E-06 |
| 77920and77930@5.asc  | 0.00209668 | 2.5327E-05 | 0.00055049 | 2.4923E-05 | 1.0208E-05 |
| 77920and77930@6.asc  | 0.00294584 | 2.7653E-05 | 0.00054845 | 4.5022E-05 | 1.3788E-05 |
| 77920and77930@7.asc  | 0.00553431 | 0.00020028 | 0.00062683 | 2.4114E-05 | 2.0448E-05 |
| 77920and77930@8.asc  | 0.00299742 | 3.5348E-05 | 0.00052239 | 2.4402E-05 | 2.4613E-05 |
| 77920and77930@10.asc | 0.00283606 | 4.797E-05  | 0.00054425 | 1.4042E-05 | 2.9763E-05 |
| 77920and77930@11.asc | 0.00339778 | 5.1919E-05 | 0.0004995  | 1.4347E-05 | 2.9388E-05 |
| 77920and77930@12.asc | 0.00341354 | 6.0236E-05 | 0.00051291 | 2.0925E-05 | 2.874E-05  |
| 77920and77930@13.asc | 0.0034374  | 6.7126E-05 | 0.00052845 | 3.4151E-05 | 3.1151E-05 |
| 77920and77930@15.asc | 0.00354825 | 0.00025467 | 0.00067406 | 8.5941E-05 | 3.3739E-05 |
| 77920and77930@16.asc | 0.00453018 | 7.1994E-05 | 0.00054377 | 1.4463E-05 | 3.8895E-05 |
| 77920and77930@17.asc | 0.0034075  | 6.0268E-05 | 0.00050948 | 2.336E-05  | 3.2004E-05 |
| 77920and77930@18.asc | 0.00308468 | 3.5784E-05 | 0.00051877 | 1.8438E-05 | 3.1011E-05 |
| 77920and77930@62.asc | 0.00442218 | 0.00011335 | 0.00059927 | 2.0048E-05 | 1.3587E-05 |
| 77920and77930@63.asc | 0.00630623 | 0.00046736 | 0.00066554 | 6.4828E-05 | 2.5675E-05 |
| 77920and77930@64.asc | 0.0053817  | 7.853E-05  | 0.00053762 | 2.9784E-05 | 2.289E-05  |
| 77920and77930@65.asc | 0.00292905 | 5.3549E-05 | 0.00051338 | 1.9817E-05 | 1.3767E-05 |
| 77915and77921@18.asc | 0.00582361 | 0.00010268 | 0.00086805 | 3.2924E-05 | 1.9005E-05 |
| 77915and77921@19.asc | 0.00277362 | 4.5787E-05 | 0.00088529 | 3.1744E-05 | 2.0538E-05 |
| 77915and77921@20.asc | 0.00277382 | 4.2891E-05 | 0.00084841 | 3.79E-05   | 1.9248E-05 |
| 77915and77921@21.asc | 0.00256263 | 3.91E-05   | 0.00077772 | 3.5459E-05 | 2.1571E-05 |
| 77915and77921@22.asc | 0.00581067 | 8.4209E-05 | 0.00087282 | 2.5137E-05 | 2.2303E-05 |

|                      |            |            |            |            |            |
|----------------------|------------|------------|------------|------------|------------|
| 77915and77921@23.asc | 0.00514116 | 8.2665E-05 | 0.00081926 | 3.3443E-05 | 1.9344E-05 |
| 77915and77921@24.asc | 0.00502653 | 9.5922E-05 | 0.00077219 | 2.2543E-05 | 1.8883E-05 |
| 77915and77921@25.asc | 0.00427259 | 6.4195E-05 | 0.00079509 | 2.4871E-05 | 1.6924E-05 |
| 77915and77921@26.asc | 0.00363574 | 5.1966E-05 | 0.00083399 | 1.9562E-05 | 1.6889E-05 |
| 77915and77921@27.asc | 0.00577476 | 8.565E-05  | 0.00088926 | 2.121E-05  | 2.0524E-05 |
| 77915and77921@28.asc | 0.00297907 | 5.4073E-05 | 0.00084741 | 2.156E-05  | 1.8682E-05 |
| 77915and77921@29.asc | 0.00906597 | 0.00011257 | 0.00091795 | 3.4488E-05 | 2.0689E-05 |
| 77915and77921@30.asc | 0.00377369 | 5.5836E-05 | 0.00084907 | 3.1479E-05 | 2.2892E-05 |
| 77915and77921@31.asc | 0.00369024 | 5.9622E-05 | 0.00084553 | 3.0683E-05 | 2.3565E-05 |
| 77915and77921@32.asc | 0.00557361 | 0.00012325 | 0.00086528 | 2.539E-05  | 2.4824E-05 |
| 77915and77921@33.asc | 0.00592954 | 0.0001618  | 0.00090425 | 2.262E-05  | 2.3658E-05 |
| 77915and77921@34.asc | 0.01018084 | 0.00015857 | 0.00086493 | 3.1036E-05 | 2.0901E-05 |
| 77915and77921@35.asc | 0.01136407 | 0.00044152 | 0.00095572 | 3.8723E-05 | 2.373E-05  |
| 77915and77921@36.asc | 0.00857921 | 0.00018196 | 0.00088997 | 2.6118E-05 | 2.3255E-05 |
| 78176and77923@29.asc | 0.00131417 | 4.4306E-05 | 0.00057265 | 3.7372E-05 | 3.0749E-05 |
| 78176and77923@30.asc | 1.40352359 | 0.00954356 | 0.00427297 | 0.00021717 | 2.2789E-05 |
| 78176and77923@31.asc | 0.01691801 | 0.00015622 | 0.00086761 | 3.2932E-05 | 2.4455E-05 |
| 78176and77923@33.asc | 0.00623486 | 0.00029005 | 0.00056635 | 1.3525E-05 | 2.2852E-05 |
| 78176and77923@34.asc | 0.00734617 | 0.0003498  | 0.00078971 | 2.6592E-05 | 3.4096E-05 |
| 78176and77923@35.asc | 0.00324656 | 8.8349E-05 | 0.00068476 | 2.5866E-05 | 2.1896E-05 |
| 78176and77923@36.asc | 0.00693981 | 0.00014023 | 0.00062482 | 3.3249E-05 | 2.298E-05  |
| 78176and77923@37.asc | 0.00705423 | 0.00013708 | 0.00062527 | 3.3512E-05 | 1.9585E-05 |
| 78176and77923@38.asc | 0.00332935 | 9.5533E-05 | 0.00060746 | 2.1131E-05 | 1.0267E-05 |
| 78176and77923@39.asc | 0.90973455 | 0.01280029 | 0.00634813 | 0.00014463 | 9.9507E-06 |
| 78176and77923@40.asc | 0.00386029 | 0.00014016 | 0.00064124 | 2.6203E-05 | 1.1691E-05 |
| 78176and77923@41.asc | 0.00315368 | 5.2005E-05 | 0.00057367 | 1.9278E-05 | 1.2388E-05 |
| 78176and77923@42.asc | 0.0050509  | 0.00011165 | 0.0007206  | 2.8554E-05 | 2.0414E-05 |
| 78176and77923@43.asc | 0.00537914 | 8.6738E-05 | 0.00057318 | 2.1996E-05 | 1.9731E-05 |
| 78176and77923@44.asc | 0.00244791 | 3.2201E-05 | 0.00058893 | 1.9701E-05 | 2.6575E-05 |
| 78176and77923@45.asc | 0.00323198 | 6.3921E-05 | 0.00060874 | 2.5608E-05 | 2.4157E-05 |
| 78176and77923@46.asc | 0.00257943 | 2.8425E-05 | 0.00054351 | 1.3363E-05 | 2.8614E-05 |
| 78176and77923@47.asc | 0.00214942 | 1.9301E-05 | 0.00050355 | 2.2857E-05 | 2.2236E-05 |
| 78176and77923@48.asc | 0.00885525 | 0.00098135 | 0.00066896 | 3.4161E-05 | 3.0967E-05 |
| 78176and77923@49.asc | 0.00503715 | 4.8598E-05 | 0.00061518 | 1.5428E-05 | 2.2609E-05 |
| 78176and77923@50.asc | 0.0022477  | 6.5109E-05 | 0.00052134 | 2.0303E-05 | 1.63E-05   |
| 78176and77923@51.asc | 0.00507004 | 0.00017186 | 0.00056912 | 2.4357E-05 | 2.7174E-05 |
| 78176and77923@52.asc | 0.00289654 | 6.5863E-05 | 0.00053806 | 1.4583E-05 | 2.3862E-05 |
| 78176and77923@53.asc | 0.00255669 | 4.0755E-05 | 0.00055119 | 2.0956E-05 | 2.6934E-05 |
| 77925and52111@34.asc | 0.02314915 | 0.00529689 | 1.40366771 | 0.00601917 | 0.00013561 |
| 77925and52111@35.asc | 0.00291856 | 4.6559E-05 | 1.44158845 | 0.00379452 | 1.0466E-05 |
| 77925and52111@37.asc | 0.00381509 | 5.2934E-05 | 1.41716624 | 0.00558231 | 1.4228E-05 |
| 77925and52111@38.asc | 0.00396411 | 8.0677E-05 | 1.41131775 | 0.00611711 | 1.2449E-05 |

|                      |            |            |            |            |            |
|----------------------|------------|------------|------------|------------|------------|
| 77925and52111@39.asc | 0.01088748 | 0.00039745 | 1.39732104 | 0.00377923 | 1.7654E-05 |
| 77925and52111@40.asc | 0.01230255 | 0.00016356 | 1.36972773 | 0.00415087 | 1.3653E-05 |
| 77925and52111@41.asc | 0.0088994  | 0.00119964 | 1.41648672 | 0.00407835 | 2.5192E-05 |
| 77925and52111@42.asc | 0.02605162 | 0.00085046 | 1.38161637 | 0.00412966 | 6.0259E-05 |
| 77925and52111@43.asc | 0.00723325 | 0.00034361 | 1.35990393 | 0.00720283 | 1.969E-05  |
| 77925and52111@44.asc | 0.00910525 | 0.00012478 | 1.36355395 | 0.00457617 | 2.1387E-05 |
| 77925and52111@45.asc | 0.00370547 | 0.00043854 | 1.3424933  | 0.00266673 | 1.6664E-05 |
| 77925and52111@46.asc | 0.00315668 | 4.3144E-05 | 1.3390685  | 0.00544096 | 1.6249E-05 |
| 77925and52111@48.asc | 0.00382069 | 8.7049E-05 | 1.32989555 | 0.00616541 | 1.36E-05   |
| 77925and52111@49.asc | 0.00358086 | 7.6291E-05 | 1.38423483 | 0.00598787 | 1.3752E-05 |
| 77925and52111@50.asc | 0.00320002 | 6.9254E-05 | 1.43018356 | 0.00408891 | 1.4239E-05 |
| 77925and52111@51.asc | 0.00954546 | 0.00015245 | 1.44394874 | 0.00435733 | 1.2354E-05 |
| 77925and52111@52.asc | 0.02104648 | 0.00037312 | 1.44462649 | 0.00289888 | 5.9669E-05 |
| 77925and52111@53.asc | 0.00781899 | 0.00010929 | 1.29631046 | 0.00328179 | 2.9632E-05 |
| 77925and52111@54.asc | 0.0054588  | 0.0001178  | 1.46318186 | 0.00502303 | 1.4241E-05 |
| 77925and52111@55.asc | 0.01287587 | 0.00019414 | 1.37676133 | 0.00517818 | 1.6949E-05 |
| 77925and52111@56.asc | 0.00325013 | 4.1173E-05 | 1.43621828 | 0.00432308 | 1.5948E-05 |
| 77925and52111@57.asc | 0.00371211 | 7.0531E-05 | 1.38467827 | 0.00565049 | 2.0407E-05 |
| 77925and52111@58.asc | 0.00512682 | 0.00069966 | 1.41785107 | 0.00477563 | 2.198E-05  |
| 77925and52111@59.asc | 0.01026646 | 0.00013829 | 1.42552818 | 0.00364933 | 1.9807E-05 |
| 77925and52111@60.asc | 0.00798319 | 0.00028255 | 1.3763375  | 0.00585048 | 1.7842E-05 |
| 77925and52111@61.asc | 0.01216735 | 0.00064197 | 1.40446705 | 0.00491909 | 2.5227E-05 |
| 77925and52111@62.asc | 0.00609068 | 0.00025685 | 1.4226117  | 0.00454061 | 2.0484E-05 |
| 77925and52111@63.asc | 0.00461496 | 8.9726E-05 | 1.41990333 | 0.00379678 | 1.4804E-05 |
| 77925and52111@64.asc | 0.00445394 | 8.4776E-05 | 1.46483037 | 0.00604931 | 1.8178E-05 |
| 77925and52111@65.asc | 0.01115891 | 0.00035746 | 1.42526198 | 0.00345531 | 2.4152E-05 |
| 77925and52111@66.asc | 0.00379775 | 4.7142E-05 | 1.45264738 | 0.00418342 | 3.0675E-05 |
| 77925and52111@67.asc | 0.27325335 | 0.00286211 | 1.41573959 | 0.00441152 | 1.8365E-05 |
| 77925and52111@68.asc | 0.00784411 | 0.00011957 | 1.36623758 | 0.00616303 | 1.3465E-05 |
| 77925and52111@69.asc | 0.00348939 | 4.3284E-05 | 1.36598567 | 0.00277678 | 1.4562E-05 |
| 77925and52111@72.asc | 0.0461712  | 0.00449999 | 1.36175658 | 0.00360242 | 0.00012527 |
| 77925and52111@73.asc | 0.00412206 | 6.6988E-05 | 1.38975447 | 0.00248706 | 1.0046E-05 |
| 77920and77930@37.asc | 0.0066517  | 0.00074426 | 0.0012938  | 0.00063619 | 3.762E-05  |
| 77920and77930@38.asc | 0.01389717 | 7.6715E-05 | 0.00052153 | 2.3859E-05 | 2.2007E-05 |
| 77920and77930@39.asc | 0.00509298 | 6.1866E-05 | 0.00047156 | 2.2372E-05 | 2.6191E-05 |
| 77920and77930@40.asc | 0.00437358 | 8.577E-05  | 0.0021064  | 8.4913E-05 | 2.7996E-05 |
| 77920and77930@41.asc | 0.00318236 | 2.9596E-05 | 0.00044615 | 2.3734E-05 | 2.6892E-05 |
| 77920and77930@42.asc | 0.00440631 | 5.2892E-05 | 0.00042472 | 1.027E-05  | 2.6057E-05 |
| 77920and77930@43.asc | 0.00511025 | 6.2504E-05 | 0.00044842 | 2.3033E-05 | 3.1114E-05 |
| 77920and77930@44.asc | 0.02402021 | 0.00027487 | 0.00242748 | 4.1966E-05 | 3.8639E-05 |
| 77920and77930@47.asc | 0.00395234 | 6.6527E-05 | 0.00050866 | 2.0624E-05 | 2.8893E-05 |
| 77920and77930@48.asc | 0.00549104 | 7.6918E-05 | 0.00059672 | 3.6834E-05 | 2.4406E-05 |

|                      |            |            |            |            |            |
|----------------------|------------|------------|------------|------------|------------|
| 77920and77930@49.asc | 0.00388164 | 7.1816E-05 | 0.00047584 | 2.2664E-05 | 3.2947E-05 |
| 77920and77930@50.asc | 0.00352515 | 5.1579E-05 | 0.00047511 | 2.7268E-05 | 2.4937E-05 |
| 77920and77930@51.asc | 0.00286901 | 4.7862E-05 | 0.00047622 | 1.5995E-05 | 2.3041E-05 |
| 77920and77930@53.asc | 0.00544207 | 6.8957E-05 | 0.00045725 | 9.1767E-06 | 2.6836E-05 |
| 77920and77930@54.asc | 0.00417823 | 6.5322E-05 | 0.00039733 | 1.9084E-05 | 2.5704E-05 |
| 77920and77930@55.asc | 0.00350242 | 5.0873E-05 | 0.00043529 | 1.8473E-05 | 2.773E-05  |
| 77920and77930@56.asc | 0.00324961 | 4.1404E-05 | 0.00044835 | 1.8855E-05 | 2.6478E-05 |
| 77920and77930@57.asc | 0.00587208 | 0.00010495 | 0.00053553 | 2.0879E-05 | 3.0129E-05 |
| 77920and77930@58.asc | 0.00354098 | 3.6697E-05 | 0.0005407  | 2.9374E-05 | 2.1619E-05 |
| 77920and77930@59.asc | 0.00280634 | 4.2161E-05 | 0.00097077 | 2.744E-05  | 2.739E-05  |
| 77920and77930@60.asc | 0.00265526 | 3.9046E-05 | 0.00102279 | 2.8711E-05 | 2.6074E-05 |
| 77932and77980@1.asc  | 0.00550604 | 6.568E-05  | 0.00051921 | 2.4913E-05 | 3.3138E-05 |
| 77932and77980@2.asc  | 0.00562122 | 5.3067E-05 | 0.00057445 | 1.429E-05  | 3.5385E-05 |
| 77932and77980@3.asc  | 0.00533957 | 7.9357E-05 | 0.00052243 | 2.1149E-05 | 3.7508E-05 |
| 77932and77980@4.asc  | 0.00904269 | 0.00016292 | 0.00061136 | 2.1397E-05 | 3.4793E-05 |
| 77932and77980@5.asc  | 0.00548951 | 9.6039E-05 | 0.00058484 | 3.6865E-05 | 3.5625E-05 |
| 77932and77980@6.asc  | 0.00693016 | 0.00015575 | 0.00060048 | 2.3761E-05 | 3.771E-05  |
| 77932and77980@7.asc  | 0.00723583 | 0.0001519  | 0.00066989 | 3.0441E-05 | 4.2496E-05 |
| 77932and77980@8.asc  | 0.99932635 | 0.0037449  | 0.00635253 | 8.3277E-05 | 3.683E-05  |
| 77932and77980@10.asc | 0.0041763  | 7.3059E-05 | 0.00054665 | 1.9614E-05 | 3.5261E-05 |
| 77932and77980@11.asc | 0.00589342 | 6.9579E-05 | 0.00058156 | 1.9111E-05 | 3.9269E-05 |
| 77932and77980@12.asc | 0.00381091 | 3.7813E-05 | 0.00055579 | 3.1634E-05 | 3.9408E-05 |
| 77932and77980@13.asc | 0.00534183 | 7.7605E-05 | 0.0005159  | 2.0064E-05 | 3.1803E-05 |
| 77932and77980@14.asc | 0.00783212 | 0.00023255 | 0.00055311 | 3.1565E-05 | 2.4723E-05 |
| 77932and77980@15.asc | 0.0087552  | 0.00032562 | 0.00060886 | 1.7426E-05 | 3.0666E-05 |
| 77932and77980@16.asc | 0.00903777 | 0.00027342 | 0.00063463 | 2.2716E-05 | 3.1107E-05 |
| 77932and77980@17.asc | 0.00805273 | 9.4911E-05 | 0.00059286 | 2.7107E-05 | 3.3514E-05 |
| 77932and77980@18.asc | 0.0070252  | 0.00014639 | 0.0006803  | 3.1644E-05 | 2.9712E-05 |
| 77932and77980@19.asc | 0.01338367 | 0.00043904 | 0.0010024  | 4.8862E-05 | 4.5553E-05 |
| 77932and77980@20.asc | 0.01488219 | 0.00012793 | 0.00063945 | 2.4705E-05 | 2.7239E-05 |
| 77932and77980@21.asc | 0.00573094 | 6.5419E-05 | 0.00054141 | 1.2647E-05 | 2.4897E-05 |
| 77932and77980@22.asc | 0.00618857 | 7.6982E-05 | 0.0005614  | 1.8822E-05 | 3.0411E-05 |
| 77932and77980@23.asc | 0.00915006 | 0.00011925 | 0.00064617 | 2.8704E-05 | 2.7317E-05 |
| 77932and77980@24.asc | 0.0056166  | 9.0888E-05 | 0.00051601 | 2.655E-05  | 2.57E-05   |
| 77932and77980@25.asc | 0.00477805 | 8.0837E-05 | 0.00052208 | 1.9891E-05 | 2.7768E-05 |
| 77932and77980@26.asc | 0.00753468 | 0.00022561 | 0.0005594  | 2.3986E-05 | 3.7474E-05 |
| 77932and77980@27.asc | 0.06387353 | 0.00298501 | 0.00081003 | 4.5136E-05 | 0.00031499 |
| 77932and77980@28.asc | 0.00405066 | 6.915E-05  | 0.00053125 | 2.0003E-05 | 2.9273E-05 |
| 77932and77980@29.asc | 0.01201024 | 0.00012088 | 0.00064701 | 2.1467E-05 | 3.4699E-05 |
| 77932and77980@30.asc | 0.06314073 | 0.0003596  | 0.0008739  | 2.5436E-05 | 3.2221E-05 |
| 77932and77980@31.asc | 0.00793404 | 0.0003722  | 0.00084413 | 6.8123E-05 | 3.5339E-05 |
| 77932and77980@32.asc | 0.01687107 | 0.00043911 | 0.0006836  | 2.4296E-05 | 7.3325E-05 |

|                      |            |            |            |            |            |
|----------------------|------------|------------|------------|------------|------------|
| 77932and77980@33.asc | 0.00872829 | 0.00016594 | 0.00066732 | 1.9389E-05 | 3.0863E-05 |
| 77932and77980@34.asc | 0.01313384 | 0.00013599 | 0.00072335 | 3.0822E-05 | 4.4387E-05 |
| 77932and77980@36.asc | 50.0010016 | 0.18079175 | 0.37590187 | 0.00090831 | 0.00016276 |
| 77932and77980@39.asc | 0.01223155 | 0.00035961 | 0.00060004 | 3.0778E-05 | 1.9039E-05 |
| 77932and77980@40.asc | 0.00556825 | 8.1897E-05 | 0.00053366 | 2.9827E-05 | 2.4154E-05 |
| 77932and77980@41.asc | 0.00500959 | 4.3124E-05 | 0.00051064 | 1.6705E-05 | 2.7012E-05 |
| 77932and77980@42.asc | 0.00601478 | 8.9576E-05 | 0.00055106 | 3.3878E-05 | 2.2618E-05 |
| 77932and77980@43.asc | 0.00722057 | 4.5234E-05 | 0.00047739 | 2.203E-05  | 2.2118E-05 |
| 77932and77980@44.asc | 0.00526902 | 5.9066E-05 | 0.00053936 | 2.1468E-05 | 2.0611E-05 |
| 77932and77980@45.asc | 0.00531223 | 5.9517E-05 | 0.00054643 | 2.1845E-05 | 1.9428E-05 |
| 77932and77980@46.asc | 0.00613138 | 0.00010046 | 0.00054928 | 1.7876E-05 | 2.4089E-05 |
| 77932and77980@47.asc | 0.00501578 | 5.5534E-05 | 0.000519   | 1.9576E-05 | 1.9396E-05 |
| 77932and77980@48.asc | 0.00501432 | 5.9654E-05 | 0.00056053 | 2.2922E-05 | 2.0426E-05 |
| 77932and77980@49.asc | 0.00522621 | 6.3639E-05 | 0.00059117 | 1.9302E-05 | 1.7982E-05 |
| 77932and77980@50.asc | 0.0052136  | 7.3061E-05 | 0.00052116 | 2.1671E-05 | 1.5977E-05 |
| 77932and77980@51.asc | 0.00930573 | 0.00036653 | 0.0005855  | 2.6479E-05 | 1.5933E-05 |
| 77932and77980@52.asc | 0.00618239 | 7.1553E-05 | 0.00051396 | 2.0893E-05 | 1.5182E-05 |
| 77932and77980@53.asc | 0.00560752 | 5.3678E-05 | 0.00055321 | 1.8656E-05 | 2.0261E-05 |
| 77932and77980@54.asc | 0.00475716 | 7.4903E-05 | 0.00055302 | 2.1309E-05 | 1.6774E-05 |
| 77932and77980@55.asc | 0.0057018  | 5.5619E-05 | 0.00060583 | 1.7144E-05 | 2.9858E-05 |
| 77932and77980@56.asc | 0.00553888 | 7.0753E-05 | 0.00053461 | 2.178E-05  | 2.746E-05  |
| 77932and77980@57.asc | 0.00523485 | 5.6501E-05 | 0.00055342 | 2.1544E-05 | 2.516E-05  |
| 77932and77980@58.asc | 0.00525227 | 6.1198E-05 | 0.00055792 | 2.6644E-05 | 2.4293E-05 |
| 77932and77980@59.asc | 0.00541304 | 5.7393E-05 | 0.00055286 | 2.0326E-05 | 2.0297E-05 |
| 77932and77980@61.asc | 0.00516842 | 6.797E-05  | 0.00054286 | 3.2021E-05 | 2.1445E-05 |
| 77932and77980@62.asc | 0.00867304 | 0.00016434 | 0.00053125 | 1.9853E-05 | 2.3228E-05 |
| 77932and77980@63.asc | 0.00716822 | 0.00022372 | 0.00061602 | 3.3566E-05 | 1.4188E-05 |
| 77932and77980@64.asc | 0.00490467 | 8.1658E-05 | 0.0005479  | 1.6011E-05 | 1.2023E-05 |
| 77932and77980@65.asc | 0.0052756  | 0.00010249 | 0.00055385 | 2.594E-05  | 2.2858E-05 |
| 77932and77980@66.asc | 0.00482336 | 3.9186E-05 | 0.00053799 | 1.8934E-05 | 1.8357E-05 |
| 77932and77980@67.asc | 0.00610462 | 6.6343E-05 | 0.0005381  | 2.2471E-05 | 1.7511E-05 |
| 77932and77980@68.asc | 0.00638118 | 7.0724E-05 | 0.00056462 | 1.8857E-05 | 2.5454E-05 |
| 77932and77980@69.asc | 0.00846225 | 9.0892E-05 | 0.00054231 | 2.6355E-05 | 2.3446E-05 |
| 77932and77980@70.asc | 0.00558894 | 5.3315E-05 | 0.00053414 | 2.6198E-05 | 2.1064E-05 |
| 77932and77980@71.asc | 0.00523318 | 5.585E-05  | 0.00056264 | 1.6343E-05 | 2.0273E-05 |
| 77932and77980@72.asc | 0.0057458  | 5.3295E-05 | 0.00059859 | 2.7617E-05 | 2.5608E-05 |
| 77932and77980@73.asc | 0.00881817 | 9.6447E-05 | 0.00057079 | 2.3258E-05 | 2.5246E-05 |
| 77932and77980@74.asc | 8.52489907 | 0.09927815 | 0.04163371 | 0.00063535 | 4.2434E-05 |
| 77932and77980@75.asc | 0.00557242 | 6.4491E-05 | 0.00056587 | 1.2406E-05 | 2.4672E-05 |
| 77932and77980@76.asc | 0.00786965 | 0.00011985 | 0.00057257 | 2.2409E-05 | 2.2927E-05 |
| 77982 test spot      | 7.61769947 | 0.05383354 | 0.03435439 | 0.00067933 | 4.1849E-05 |
| 77982and52618@1.asc  | 0.00985777 | 0.00018012 | 0.0007854  | 2.3445E-05 | 3.2503E-05 |

|                      |            |            |            |            |            |
|----------------------|------------|------------|------------|------------|------------|
| 77982and52618@2.asc  | 0.00615448 | 0.00011398 | 0.00060937 | 2.6924E-05 | 3.0804E-05 |
| 77982and52618@3.asc  | 0.00681648 | 0.00028101 | 0.0005726  | 2.1454E-05 | 2.697E-05  |
| 77982and52618@4.asc  | 0.02738608 | 0.00058755 | 0.00109241 | 4.5217E-05 | 0.00012991 |
| 77982and52618@5.asc  | 0.05375036 | 0.00138934 | 0.00106691 | 3.1673E-05 | 0.00015356 |
| 77982and52618@6.asc  | 0.00947108 | 0.00015847 | 0.00064944 | 2.1598E-05 | 3.0465E-05 |
| 77982and52618@7.asc  | 0.00528568 | 7.4608E-05 | 0.00057002 | 2.4615E-05 | 2.3673E-05 |
| 77982and52618@8.asc  | 0.00637549 | 7.9715E-05 | 0.00057641 | 2.1032E-05 | 2.3498E-05 |
| 77982and52618@9.asc  | 0.00413698 | 4.584E-05  | 0.00054064 | 2.0703E-05 | 2.0854E-05 |
| 77982and52618@10.asc | 0.00599022 | 5.8657E-05 | 0.00054236 | 1.7618E-05 | 2.1049E-05 |
| 77982and52618@11.asc | 0.00567048 | 6.1357E-05 | 0.00055774 | 2.1739E-05 | 2.4432E-05 |
| 77982and52618@12.asc | 0.00377517 | 5.2785E-05 | 0.00055369 | 2.5869E-05 | 2.2295E-05 |
| ST12Civ@1.asc        | 0.01012095 | 0.00014531 | 0.00063731 | 1.2177E-05 | 3.0605E-05 |
| ST12Civ@2.asc        | 0.01951327 | 0.00031977 | 0.0007056  | 1.6296E-05 | 5.3112E-05 |
| ST12Civ@3.asc        | 0.0104869  | 0.0004263  | 0.00063402 | 2.3745E-05 | 4.7175E-05 |
| ST12Civ@4.asc        | 0.00559243 | 0.00010497 | 0.00048352 | 2.2275E-05 | 2.653E-05  |
| ST12Civ@5.asc        | 0.00587366 | 3.5621E-05 | 0.00049104 | 1.3646E-05 | 2.6759E-05 |
| ST12Civ@6.asc        | 0.00658897 | 0.00017127 | 0.00052997 | 1.8693E-05 | 2.7872E-05 |
| ST12Civ@7.asc        | 0.00562052 | 0.0001043  | 0.00051528 | 1.6829E-05 | 2.5961E-05 |
| ST12Civ@8.asc        | 0.00590843 | 0.0002757  | 0.00050961 | 1.5779E-05 | 2.3271E-05 |
| ST12Civ@9.asc        | 0.01734436 | 0.00185959 | 0.00059099 | 1.2922E-05 | 3.3414E-05 |
| ST12Civ@10.asc       | 0.00387593 | 5.609E-05  | 0.00049854 | 2.1585E-05 | 1.3899E-05 |
| ST12Civ@11.asc       | 0.00445075 | 5.0865E-05 | 0.00048578 | 1.994E-05  | 1.428E-05  |
| ST12Civ@12.asc       | 0.00504997 | 4.8523E-05 | 0.00053101 | 3.0019E-05 | 1.666E-05  |
| ST12Civ@13.asc       | 0.0050459  | 4.618E-05  | 0.00046653 | 1.6119E-05 | 2.1452E-05 |
| ST12Civ@14.asc       | 0.0051806  | 6.2161E-05 | 0.00048363 | 2.4243E-05 | 2.0035E-05 |
| ST12Civ@15.asc       | 0.01221162 | 0.00082948 | 0.00083526 | 7.9584E-05 | 3.6314E-05 |
| ST12Civ@16.asc       | 0.00541589 | 4.7656E-05 | 0.00049882 | 1.5533E-05 | 2.3164E-05 |
| ST12Civ@17.asc       | 0.00822815 | 0.00010585 | 0.00050212 | 1.2082E-05 | 2.5358E-05 |
| ST12Civ@18.asc       | 0.00714    | 0.00013204 | 0.00048152 | 1.5946E-05 | 2.8926E-05 |
| ST12Civ@19.asc       | 0.00421601 | 2.6554E-05 | 0.00047331 | 1.4909E-05 | 1.1322E-05 |
| ST12Civ@20.asc       | 0.01119074 | 0.00021423 | 0.00078949 | 2.7535E-05 | 0.00011463 |
| ST12Civ@21.asc       | 0.01047111 | 7.7186E-05 | 0.0005187  | 2.1013E-05 | 2.2246E-05 |
| ST12Civ@22.asc       | 0.00436615 | 5.8416E-05 | 0.00047056 | 1.8852E-05 | 2.2312E-05 |
| ST12Civ@23.asc       | 0.00798092 | 0.00021379 | 0.00059139 | 1.8791E-05 | 3.0668E-05 |
| ST12Civ@24.asc       | 0.00505257 | 2.9888E-05 | 0.00050672 | 1.6003E-05 | 2.4557E-05 |
| ST12Civ@25.asc       | 0.00470526 | 5.6876E-05 | 0.00043215 | 1.2058E-05 | 2.8018E-05 |
| ST12Civ@26.asc       | 0.15414627 | 0.00710515 | 0.00051306 | 2.7962E-05 | 2.856E-05  |
| ST12Civ@27.asc       | 0.00406613 | 5.0454E-05 | 0.00047471 | 1.8911E-05 | 8.5281E-06 |
| ST12Civ@28.asc       | 0.00697668 | 9.2981E-05 | 0.00051711 | 1.7432E-05 | 1.1083E-05 |
| ST12Civ@31.asc       | 0.01313534 | 0.00021546 | 0.00049197 | 1.5354E-05 | 1.6644E-05 |
| ST12Civ@32.asc       | 0.00492895 | 0.0002441  | 0.00052225 | 1.2598E-05 | 2.0387E-05 |
| ST12Civ@33.asc       | 0.00563008 | 7.3472E-05 | 0.00043637 | 2.4474E-05 | 2.4749E-05 |

|                |            |            |            |            |            |
|----------------|------------|------------|------------|------------|------------|
| ST12Civ@34.asc | 0.00934088 | 0.00069869 | 0.00060161 | 3.8778E-05 | 5.1995E-05 |
| ST12Civ@36.asc | 0.00341325 | 4.8186E-05 | 0.00049459 | 1.6781E-05 | 7.2707E-06 |
| ST12Civ@37.asc | 0.00513231 | 0.00013915 | 0.0004563  | 1.3975E-05 | 1.017E-05  |
| ST12Civ@38.asc | 0.0059369  | 3.6761E-05 | 0.0004995  | 1.5946E-05 | 7.8972E-06 |
| ST12Civ@39.asc | 0.00365786 | 7.056E-05  | 0.00046104 | 1.5487E-05 | 6.804E-06  |
| ST12Civ@40.asc | 0.00674637 | 0.00010019 | 0.00052204 | 1.7322E-05 | 4.4854E-06 |
| ST12Civ@42.asc | 0.00797529 | 7.3398E-05 | 0.00049663 | 1.65E-05   | 2.1983E-05 |
| ST12Civ@43.asc | 0.03608708 | 0.00154724 | 0.00189408 | 6.8937E-05 | 0.00018818 |
| ST12Civ@44.asc | 0.00487687 | 6.3567E-05 | 0.00047103 | 1.5981E-05 | 3.1232E-05 |
| ST12Civ@45.asc | 0.00936138 | 0.00035421 | 0.00068484 | 3.4047E-05 | 6.6782E-05 |
| ST12Civ@46.asc | 0.00569495 | 7.7921E-05 | 0.00047313 | 1.6207E-05 | 2.1854E-05 |
| ST12Civ@47.asc | 0.00448338 | 5.067E-05  | 0.00049746 | 2.5921E-05 | 2.721E-05  |
| ST12Civ@48.asc | 0.00357139 | 5.3332E-05 | 0.0004161  | 4.9082E-05 | 2.7422E-05 |
| ST12Civ@49.asc | 0.00969417 | 0.00015458 | 0.00051596 | 2.5737E-05 | 1.6783E-05 |
| ST12Civ@50.asc | 0.00332843 | 4.0686E-05 | 0.0004714  | 1.4024E-05 | 2.4051E-05 |
| ST12Civ@51.asc | 0.0055491  | 5.3493E-05 | 0.00048883 | 2.1295E-05 | 1.989E-05  |
| ST12Civ@52.asc | 0.00702935 | 0.00020297 | 0.00048287 | 2.0615E-05 | 1.4995E-05 |
| ST12Civ@53.asc | 0.01396169 | 0.00203233 | 0.00064189 | 3.4548E-05 | 5.9555E-05 |
| ST12Civ@54.asc | 0.00849416 | 0.00035576 | 0.00056322 | 2.7147E-05 | 5.4974E-05 |
| ST12Civ@55.asc | 0.01594541 | 0.00122214 | 0.00064154 | 3.9264E-05 | 0.00011656 |
| ST12Civ@56.asc | 0.00952296 | 8.2262E-05 | 0.00051044 | 2.0632E-05 | 2.7419E-05 |
| ST12Civ@57.asc | 0.0068945  | 5.6931E-05 | 0.0005119  | 1.9698E-05 | 2.0982E-05 |
| ST12Civ@58.asc | 0.00438871 | 3.7574E-05 | 0.00046233 | 1.6305E-05 | 1.8852E-05 |
| ST12Civ@59.asc | 0.00652374 | 0.00011603 | 0.00048864 | 2.7182E-05 | 2.4118E-05 |
| ST12Civ@60.asc | 0.00605428 | 0.000112   | 0.00048797 | 2.737E-05  | 1.2533E-05 |
| ST12Civ@61.asc | 0.00651774 | 8.1369E-05 | 0.00044178 | 1.7182E-05 | 2.0214E-05 |
| ST12Civ@62.asc | 0.00751448 | 0.00021939 | 0.00060119 | 4.0544E-05 | 3.0192E-05 |
| ST12Civ@63.asc | 0.00470608 | 4.413E-05  | 0.00044093 | 2.1813E-05 | 1.7954E-05 |
| ST12Civ@64.asc | 0.00488106 | 7.5211E-05 | 0.00046239 | 1.6348E-05 | 2.7346E-05 |
| ST12Civ@65.asc | 0.00899751 | 0.00015755 | 0.00053113 | 1.6886E-05 | 2.2775E-05 |
| ST12Civ@66.asc | 0.01889073 | 0.01250474 | 0.00046119 | 5.3321E-05 | 3.2114E-05 |
| ST12Civ@67.asc | 0.00580882 | 8.2465E-05 | 0.00044026 | 2.5162E-05 | 2.7807E-05 |
| ST12Civ@68.asc | 0.00503249 | 5.3029E-05 | 0.00046838 | 2.0466E-05 | 2.6669E-05 |
| ST12Civ@69.asc | 0.00626226 | 8.737E-05  | 0.00046643 | 1.0413E-05 | 2.8795E-05 |
| ST12Civ@70.asc | 0.0053906  | 7.9862E-05 | 0.00049012 | 1.5657E-05 | 2.9656E-05 |
| ST12Civ@71.asc | 0.0050099  | 7.183E-05  | 0.00044294 | 1.159E-05  | 2.8279E-05 |
| ST12Civ@72.asc | 0.00533753 | 4.1798E-05 | 0.00052269 | 1.1393E-05 | 3.0005E-05 |
| ST12Civ@73.asc | 0.0045164  | 6.7207E-05 | 0.0004671  | 2.4088E-05 | 3.0115E-05 |
| ST12Civ@74.asc | 0.00447608 | 4.8305E-05 | 0.00049192 | 3.2137E-05 | 2.6568E-05 |
| ST12Civ@75.asc | 0.0044235  | 4.6291E-05 | 0.00050752 | 2.2335E-05 | 2.6736E-05 |
| ST12Civ@76.asc | 0.00530638 | 6.2531E-05 | 0.00126681 | 0.00036046 | 2.6278E-05 |
| ST12Civ@77.asc | 0.00704342 | 0.0001726  | 0.00057428 | 3.6472E-05 | 2.9331E-05 |



|                 |            |            |            |            |            |
|-----------------|------------|------------|------------|------------|------------|
| ST12Civ@78.asc  | 0.00503809 | 5.9754E-05 | 0.00049039 | 2.1184E-05 | 2.7103E-05 |
| ST12Civ@79.asc  | 0.00561877 | 6.052E-05  | 0.00047833 | 2.5161E-05 | 2.804E-05  |
| ST12Civ@80.asc  | 0.00463908 | 4.5127E-05 | 0.00047109 | 2.2191E-05 | 2.8739E-05 |
| ST12Civ@81.asc  | 0.00333918 | 5.8819E-05 | 0.00040667 | 2.4335E-05 | 2.963E-05  |
| ST12Civ@82.asc  | 0.00495314 | 5.0627E-05 | 0.00045461 | 3.6678E-05 | 2.4458E-05 |
| ST12Civ@83.asc  | 0.00575455 | 0.00013284 | 0.00072742 | 7.1296E-05 | 2.527E-05  |
| ST12Civ@85.asc  | 0.00496945 | 3.8373E-05 | 0.00047061 | 3.2655E-05 | 2.4791E-05 |
| ST12Civ@86.asc  | 0.00309668 | 4.8625E-05 | 0.00044502 | 7.8582E-06 | 2.2542E-05 |
| ST12Civ@87.asc  | 0.00475415 | 3.76E-05   | 0.00048731 | 1.8289E-05 | 2.4023E-05 |
| ST12Civ@88.asc  | 0.00456605 | 6.9912E-05 | 0.00049774 | 1.7099E-05 | 2.4155E-05 |
| ST12Civ@89.asc  | 0.01047044 | 0.00018736 | 0.0006109  | 2.3317E-05 | 2.5466E-05 |
| ST12Civ@90.asc  | 0.00639134 | 5.1582E-05 | 0.00048419 | 2.671E-05  | 5.4835E-06 |
| ST12Civ@91.asc  | 0.00559212 | 0.0001003  | 0.00049391 | 2.228E-05  | 5.3292E-06 |
| ST12Civ@92.asc  | 0.02044516 | 0.00259126 | 0.0008534  | 3.9981E-05 | 4.9764E-05 |
| ST12Civ@93.asc  | 0.00541614 | 6.4608E-05 | 0.00048596 | 2.3426E-05 | 1.8146E-05 |
| ST12Civ@95.asc  | 0.01842953 | 0.00042795 | 0.00055326 | 2.5139E-05 | 3.91E-05   |
| ST12Civ@96.asc  | 0.00458218 | 5.9394E-05 | 0.00064454 | 3.4637E-05 | 3.0948E-05 |
| ST12Civ@97.asc  | 0.00757866 | 0.00016917 | 0.00067122 | 6.8048E-05 | 3.7076E-05 |
| ST12Civ@98.asc  | 0.00429651 | 2.9911E-05 | 0.00049272 | 2.4484E-05 | 1.2925E-05 |
| ST12Civ@99.asc  | 0.00318667 | 4.4767E-05 | 0.00048216 | 2.8047E-05 | 1.4291E-05 |
| ST12Civ@100.asc | 0.00586965 | 6.6391E-05 | 0.00051704 | 2.5101E-05 | 1.4853E-05 |
| ST12Civ@101.asc | 0.01040755 | 0.00021411 | 0.00051552 | 2.8646E-05 | 6.5924E-06 |
| ST12Civ@102.asc | 0.00420485 | 8.3408E-05 | 0.00051837 | 4.1933E-05 | 3.2008E-05 |
| ST12Civ@103.asc | 0.00439916 | 9.6457E-05 | 0.00047225 | 2.2622E-05 | 2.9681E-05 |
| ST12Civ@104.asc | 0.00665677 | 7.2168E-05 | 0.0004773  | 2.3155E-05 | 2.8697E-05 |
| ST12Civ@105.asc | 0.00356809 | 6.6058E-05 | 0.00047662 | 1.8207E-05 | 3.1257E-05 |
| ST12Civ@106.asc | 0.00475381 | 5.8987E-05 | 0.00042335 | 2.5144E-05 | 2.5019E-05 |
| ST12Civ@107.asc | 0.00491215 | 7.5092E-05 | 0.00041926 | 2.5594E-05 | 2.9076E-05 |
| ST12Civ@108.asc | 0.00866712 | 0.00011305 | 0.00051408 | 2.8112E-05 | 2.7185E-05 |
| ST12Civ@109.asc | 0.00630084 | 0.00012622 | 0.00035823 | 2.6152E-05 | 3.151E-05  |
| ST12Civ@110.asc | 0.0051549  | 5.3263E-05 | 0.00039591 | 1.3816E-05 | 2.8715E-05 |
| ST12Civ@111.asc | 0.0033184  | 5.6196E-05 | 0.00037144 | 1.515E-05  | 2.5388E-05 |
| ST12Civ@112.asc | 0.0046603  | 8.1258E-05 | 0.00042235 | 2.7625E-05 | 2.591E-05  |
| ST12Civ@113.asc | 0.00409119 | 5.0594E-05 | 0.00036044 | 1.5443E-05 | 2.727E-05  |
| ST12Civ@114.asc | 0.00420755 | 4.197E-05  | 0.00040233 | 1.6755E-05 | 2.5601E-05 |
| ST12Civ@115.asc | 0.00534038 | 6.7733E-05 | 0.00042784 | 2.2124E-05 | 2.6035E-05 |
| ST12Civ@116.asc | 0.00543678 | 6.706E-05  | 0.0004399  | 3.0754E-05 | 2.5062E-05 |
| ST12Civ@117.asc | 0.00381557 | 5.9124E-05 | 0.00040131 | 2.3154E-05 | 2.2252E-05 |
| ST12Civ@118.asc | 0.00443697 | 5.7621E-05 | 0.00045773 | 2.6499E-05 | 2.5932E-05 |
| ST12Civ@119.asc | 0.00505426 | 8.6058E-05 | 0.00045915 | 2.9188E-05 | 2.7618E-05 |
| ST12Civ@120.asc | 0.00595842 | 5.9176E-05 | 0.00046232 | 2.1987E-05 | 2.8194E-05 |
| ST12Civ@121.asc | 0.00678995 | 0.00021651 | 0.0004901  | 3.8426E-05 | 2.853E-05  |

|                 |            |            |            |            |            |
|-----------------|------------|------------|------------|------------|------------|
| ST12Civ@122.asc | 0.00397837 | 6.2288E-05 | 0.00044089 | 4.15E-05   | 2.3832E-05 |
| ST12Civ@123.asc | 0.00382942 | 5.9787E-05 | 0.00047758 | 2.7192E-05 | 2.0228E-05 |
| ST12Civ@124.asc | 0.0052688  | 8.4551E-05 | 0.00052032 | 4.7395E-05 | 2.5085E-05 |
| ST12Civ@125.asc | 0.008054   | 0.00037625 | 0.0007892  | 7.3718E-05 | 3.1089E-05 |
| ST12Civ@126.asc | 0.00504937 | 4.2514E-05 | 0.00045875 | 2.9782E-05 | 1.9768E-05 |
| ST12Civ@127.asc | 0.00529298 | 0.00012035 | 0.00041479 | 5.4762E-05 | 1.9626E-05 |
| ST12Civ@130.asc | 0.00483135 | 6.4413E-05 | 0.00050805 | 3.4192E-05 | 2.6272E-05 |

| smean      | 49Ti/30Si  | smean      | 56Fe/30Si | smean | Tiave | 1sig |
|------------|------------|------------|-----------|-------|-------|------|
| 1.8242E-06 | 2.4312E-05 | 1.218E-06  | NA        | NA    | 3.61  | 0.14 |
| 1.6039E-06 | 2.2619E-05 | 1.4891E-06 | NA        | NA    | 3.34  | 0.15 |
| 1.3151E-06 | 2.5169E-05 | 1.283E-06  | NA        | NA    | 3.37  | 0.13 |
| 1.4809E-06 | 2.1745E-05 | 1.7041E-06 | NA        | NA    | 2.92  | 0.15 |
| 9.6805E-07 | 2.0788E-05 | 1.0005E-06 | NA        | NA    | 3.01  | 0.10 |
| 1.9582E-06 | 2.1024E-05 | 1.3658E-06 | NA        | NA    | 3.08  | 0.15 |
| 1.5493E-06 | 1.7937E-05 | 1.5958E-06 | NA        | NA    | 2.71  | 0.15 |
| 1.3921E-06 | 1.4473E-05 | 7.1589E-07 | NA        | NA    | 2.16  | 0.10 |
| 9.5178E-07 | 1.9099E-05 | 1.2553E-06 | NA        | NA    | 2.61  | 0.11 |
| 1.1601E-06 | 2.1012E-05 | 1.5408E-06 | NA        | NA    | 3.07  | 0.14 |
| 5.6765E-07 | 5.9614E-06 | 4.0173E-07 | NA        | NA    | 0.87  | 0.04 |
| 1.0033E-06 | 9.6034E-06 | 8.6725E-07 | NA        | NA    | 1.35  | 0.08 |
| 1.6232E-06 | 1.2669E-05 | 1.0602E-06 | NA        | NA    | 1.77  | 0.12 |
| 9.2915E-07 | 1.2679E-05 | 1.1337E-06 | NA        | NA    | 1.78  | 0.10 |
| 1.748E-06  | 1.5976E-05 | 8.1344E-07 | NA        | NA    | 2.18  | 0.11 |
| 1.1653E-06 | 1.6573E-05 | 1.219E-06  | NA        | NA    | 2.60  | 0.12 |
| 7.6536E-07 | 8.6479E-06 | 8.4821E-07 | NA        | NA    | 1.22  | 0.08 |
| 7.9167E-07 | 8.5826E-06 | 7.9921E-07 | NA        | NA    | 1.17  | 0.07 |
| 8.4264E-07 | 1.2688E-05 | 9.906E-07  | NA        | NA    | 1.81  | 0.09 |
| 1.6854E-06 | 1.9382E-05 | 1.4253E-06 | NA        | NA    | 2.77  | 0.14 |
| 1.7587E-06 | 2.2599E-05 | 1.5811E-06 | NA        | NA    | 3.05  | 0.15 |
| 1.6806E-06 | 2.0184E-05 | 1.3558E-06 | NA        | NA    | 2.70  | 0.14 |
| 1.5814E-06 | 2.0121E-05 | 1.2479E-06 | NA        | NA    | 2.87  | 0.13 |
| 7.1665E-07 | 1.7903E-05 | 1.2258E-06 | NA        | NA    | 2.39  | 0.10 |
| 1.4406E-06 | 1.9049E-05 | 1.1057E-06 | NA        | NA    | 2.52  | 0.12 |
| 1.5101E-06 | 1.5531E-05 | 1.5405E-06 | NA        | NA    | 2.25  | 0.14 |
| 1.4763E-06 | 1.7107E-05 | 1.3143E-06 | NA        | NA    | 2.36  | 0.13 |
| 5.2767E-06 | 1.964E-05  | 2.7314E-06 | NA        | NA    | 3.00  | 0.34 |
| 1.3208E-06 | 1.4421E-05 | 7.4531E-07 | NA        | NA    | 2.12  | 0.09 |
| 1.387E-06  | 1.3586E-05 | 1.2021E-06 | NA        | NA    | 2.11  | 0.12 |
| 1.5747E-06 | 2.0698E-05 | 1.4335E-06 | NA        | NA    | 3.09  | 0.14 |
| 1.343E-06  | 1.6602E-05 | 1.4019E-06 | NA        | NA    | 2.17  | 0.13 |
| 2.0452E-06 | 3.0603E-05 | 2.3123E-06 | NA        | NA    | 4.26  | 0.21 |
| 1.1423E-06 | 1.9565E-05 | 2.0589E-06 | NA        | NA    | 2.84  | 0.17 |
| 1.533E-06  | 2.0434E-05 | 5.879E-07  | NA        | NA    | 2.94  | 0.10 |
| 9.6234E-07 | 1.8424E-05 | 1.5766E-06 | NA        | NA    | 2.68  | 0.13 |
| 2.1182E-06 | 3.2697E-05 | 1.4082E-06 | NA        | NA    | 4.23  | 0.17 |
| 1.2895E-06 | 2.156E-05  | 1.4829E-06 | NA        | NA    | 3.09  | 0.14 |
| 8.9951E-07 | 2.1339E-05 | 1.0418E-06 | NA        | NA    | 3.00  | 0.10 |

|            |            |            |    |    |        |      |
|------------|------------|------------|----|----|--------|------|
| 1.15E-06   | 1.2093E-05 | 9.9586E-07 | NA | NA | 1.60   | 0.10 |
| 1.0293E-06 | 1.8944E-05 | 1.2473E-06 | NA | NA | 2.60   | 0.11 |
| 1.3128E-06 | 2.5289E-05 | 1.4863E-06 | NA | NA | 3.54   | 0.14 |
| 1.6359E-06 | 2.4792E-05 | 1.3928E-06 | NA | NA | 3.40   | 0.14 |
| 1.9252E-06 | 2.361E-05  | 1.5301E-06 | NA | NA | 3.24   | 0.16 |
| 9.9332E-07 | 1.3684E-05 | 8.9819E-07 | NA | NA | 2.19   | 0.09 |
| 1.6804E-06 | 1.9541E-05 | 1.0827E-06 | NA | NA | 2.80   | 0.13 |
| 2.0271E-05 | 8.72E-05   | 1.4246E-05 | NA | NA | 12.75  | 1.47 |
| 1.9571E-06 | 2.0012E-05 | 1.0672E-06 | NA | NA | 2.88   | 0.14 |
| 1.4868E-06 | 1.599E-05  | 1.2799E-06 | NA | NA | 2.31   | 0.13 |
| 1.378E-06  | 2.1515E-05 | 1.069E-06  | NA | NA | 2.99   | 0.12 |
| 7.1866E-05 | 0.00142392 | 4.0511E-05 | NA | NA | 202.91 | 5.92 |
| 3.536E-06  | 4.9638E-05 | 2.6743E-06 | NA | NA | 6.81   | 0.29 |
| 1.5024E-06 | 1.9605E-05 | 1.1068E-06 | NA | NA | 2.78   | 0.12 |
| 1.8344E-06 | 2.1457E-05 | 1.0275E-06 | NA | NA | 3.00   | 0.13 |
| 2.5377E-06 | 2.72E-05   | 1.5635E-06 | NA | NA | 3.75   | 0.18 |
| 1.259E-06  | 2.2325E-05 | 1.3824E-06 | NA | NA | 3.05   | 0.13 |
| 1.0455E-06 | 1.6848E-05 | 1.2181E-06 | NA | NA | 2.36   | 0.11 |
| 4.8888E-07 | 1.5973E-05 | 8.1827E-07 | NA | NA | 1.99   | 0.07 |
| 5.3546E-05 | 0.00185322 | 4.2262E-05 | NA | NA | 262.45 | 6.21 |
| 1.6093E-06 | 1.2771E-05 | 9.6072E-07 | NA | NA | 1.96   | 0.11 |
| 5.1434E-06 | 3.7842E-05 | 4.2142E-06 | NA | NA | 5.27   | 0.41 |
| 9.4119E-07 | 6.3261E-06 | 6.2909E-07 | NA | NA | 0.94   | 0.07 |
| 1.3035E-06 | 1.6254E-05 | 1.4531E-06 | NA | NA | 2.43   | 0.13 |
| 1.4839E-06 | 2.4849E-05 | 1.3117E-06 | NA | NA | 3.49   | 0.14 |
| 1.5304E-06 | 2.5275E-05 | 1.452E-06  | NA | NA | 3.61   | 0.14 |
| 1.358E-06  | 1.8104E-05 | 4.7583E-07 | NA | NA | 2.48   | 0.09 |
| 1.713E-06  | 1.9956E-05 | 1.4552E-06 | NA | NA | 2.80   | 0.14 |
| 9.4873E-07 | 1.7984E-05 | 1.4798E-06 | NA | NA | 2.48   | 0.12 |
| 9.2859E-07 | 1.879E-05  | 1.1955E-06 | NA | NA | 2.79   | 0.11 |
| 1.3243E-06 | 2.174E-05  | 1.2253E-06 | NA | NA | 2.83   | 0.12 |
| 1.2381E-06 | 1.9504E-05 | 1.3303E-06 | NA | NA | 2.59   | 0.12 |
| 2.8546E-06 | 1.8307E-05 | 1.8496E-06 | NA | NA | 2.73   | 0.20 |
| 1.0898E-06 | 8.3578E-06 | 6.4167E-07 | NA | NA | 1.16   | 0.08 |
| 5.0839E-07 | 1.5222E-05 | 1.0018E-06 | NA | NA | 2.09   | 0.08 |
| 1.2202E-06 | 1.2567E-05 | 1.1446E-06 | NA | NA | 1.72   | 0.11 |
| 1.0116E-06 | 1.0756E-05 | 9.1867E-07 | NA | NA | 1.44   | 0.09 |
| 8.3779E-07 | 1.5515E-05 | 1.0159E-06 | NA | NA | 2.18   | 0.09 |
| 6.3129E-07 | 1.3646E-05 | 1.262E-06  | NA | NA | 1.77   | 0.10 |
| 1.5847E-06 | 1.5721E-05 | 1.0857E-06 | NA | NA | 2.28   | 0.12 |
| 1.4207E-06 | 2.5263E-05 | 1.8278E-06 | NA | NA | 3.55   | 0.16 |
| 1.6475E-06 | 1.7436E-05 | 1.3866E-06 | NA | NA | 2.41   | 0.14 |

|            |            |            |    |    |      |      |
|------------|------------|------------|----|----|------|------|
| 6.3324E-07 | 7.2451E-06 | 5.818E-07  | NA | NA | 1.01 | 0.06 |
| 1.1197E-06 | 6.3083E-06 | 8.0656E-07 | NA | NA | 1.02 | 0.08 |
| 2.3677E-06 | 2.1098E-05 | 1.4229E-06 | NA | NA | 2.70 | 0.17 |
| 2.1151E-06 | 2.4036E-05 | 1.8093E-06 | NA | NA | 3.30 | 0.18 |
| 1.3135E-06 | 2.2318E-05 | 1.3178E-06 | NA | NA | 3.16 | 0.13 |
| 8.1838E-07 | 1.9144E-05 | 1.5972E-06 | NA | NA | 2.90 | 0.13 |
| 1.0819E-06 | 1.9034E-05 | 1.2267E-06 | NA | NA | 2.69 | 0.11 |
| 1.2419E-06 | 2.2559E-05 | 1.1898E-06 | NA | NA | 3.15 | 0.12 |
| 1.4037E-06 | 2.3246E-05 | 1.4379E-06 | NA | NA | 3.14 | 0.14 |
| 1.0604E-06 | 1.4084E-05 | 1.1702E-06 | NA | NA | 2.04 | 0.11 |
| 1.2508E-06 | 2.3192E-05 | 1.4663E-06 | NA | NA | 3.29 | 0.14 |
| 1.4384E-06 | 2.1213E-05 | 1.4114E-06 | NA | NA | 3.25 | 0.14 |
| 1.4765E-06 | 1.7068E-05 | 9.2384E-07 | NA | NA | 2.65 | 0.11 |
| 1.6956E-06 | 1.4406E-05 | 1.2531E-06 | NA | NA | 2.09 | 0.13 |
| 1.7637E-06 | 2.3778E-05 | 9.25E-07   | NA | NA | 3.23 | 0.13 |
| 2.0189E-06 | 2.2572E-05 | 1.7487E-06 | NA | NA | 3.20 | 0.17 |
| 2.2623E-06 | 2.0975E-05 | 1.5008E-06 | NA | NA | 2.82 | 0.17 |
| 1.5293E-06 | 1.9277E-05 | 1.1918E-06 | NA | NA | 3.03 | 0.13 |
| 1.1368E-06 | 1.3766E-05 | 7.0985E-07 | NA | NA | 2.00 | 0.09 |
| 1.4098E-06 | 1.3669E-05 | 8.6537E-07 | NA | NA | 1.98 | 0.10 |
| 1.3735E-06 | 1.4377E-05 | 1.0137E-06 | NA | NA | 2.11 | 0.11 |
| 1.3096E-06 | 1.7672E-05 | 1.2981E-06 | NA | NA | 2.50 | 0.12 |
| 9.1158E-07 | 1.5985E-05 | 1.1605E-06 | NA | NA | 2.14 | 0.10 |
| 8.9019E-07 | 4.9244E-06 | 8.0681E-07 | NA | NA | 0.66 | 0.07 |
| 1.5925E-06 | 2.232E-05  | 7.0113E-07 | NA | NA | 2.95 | 0.11 |
| 1.5798E-05 | 2.8334E-05 | 1.0937E-05 | NA | NA | 4.32 | 1.13 |
| 5.7603E-07 | 4.4106E-06 | 7.1212E-07 | NA | NA | 0.54 | 0.06 |
| 2.0567E-06 | 1.2118E-05 | 8.8893E-07 | NA | NA | 1.60 | 0.13 |
| 7.6945E-07 | 4.4389E-06 | 5.2329E-07 | NA | NA | 0.56 | 0.06 |
| 9.5629E-07 | 8.4292E-06 | 7.3719E-07 | NA | NA | 1.16 | 0.07 |
| 1.8895E-06 | 2.3928E-05 | 1.1478E-06 | NA | NA | 2.96 | 0.14 |
| 1.9849E-06 | 2.2038E-05 | 1.8736E-06 | NA | NA | 3.02 | 0.18 |
| 1.7197E-06 | 2.4204E-05 | 1.669E-06  | NA | NA | 3.43 | 0.16 |
| 1.2946E-06 | 2.3645E-05 | 2.4612E-06 | NA | NA | 3.11 | 0.19 |
| 9.6087E-07 | 1.4139E-05 | 9.3866E-07 | NA | NA | 2.09 | 0.09 |
| 1.115E-06  | 1.1671E-05 | 1.0738E-06 | NA | NA | 1.60 | 0.10 |
| 5.1321E-07 | 9.07E-06   | 1.3737E-06 | NA | NA | 1.48 | 0.10 |
| 1.4595E-06 | 1.4511E-05 | 1.1283E-06 | NA | NA | 2.07 | 0.12 |
| 1.0026E-06 | 1.0322E-05 | 6.325E-07  | NA | NA | 1.51 | 0.07 |
| 1.1123E-06 | 1.8941E-05 | 9.7986E-07 | NA | NA | 2.65 | 0.10 |
| 1.2994E-06 | 2.4688E-05 | 1.0436E-06 | NA | NA | 3.54 | 0.12 |
| 2.3809E-06 | 2.3393E-05 | 1.3607E-06 | NA | NA | 3.25 | 0.17 |

|            |            |            |    |    |       |      |
|------------|------------|------------|----|----|-------|------|
| 9.5704E-07 | 2.2406E-05 | 1.392E-06  | NA | NA | 3.02  | 0.12 |
| 1.0538E-06 | 1.8866E-05 | 9.3595E-07 | NA | NA | 2.75  | 0.10 |
| 1.3897E-06 | 2.0402E-05 | 1.3037E-06 | NA | NA | 2.84  | 0.13 |
| 7.5135E-07 | 1.0397E-05 | 9.2788E-07 | NA | NA | 1.41  | 0.08 |
| 1.4371E-06 | 1.4724E-05 | 8.8563E-07 | NA | NA | 2.23  | 0.10 |
| 1.3653E-06 | 1.8907E-05 | 7.8699E-07 | NA | NA | 2.88  | 0.10 |
| 1.5257E-06 | 1.9823E-05 | 9.7875E-07 | NA | NA | 2.79  | 0.12 |
| 1.2922E-06 | 1.8032E-05 | 1.2921E-06 | NA | NA | 2.52  | 0.12 |
| 1.1555E-06 | 2.1537E-05 | 1.1216E-06 | NA | NA | 2.73  | 0.11 |
| 1.7037E-06 | 1.5804E-05 | 8.3375E-07 | NA | NA | 2.24  | 0.11 |
| 1.4597E-06 | 2.4189E-05 | 1.3509E-06 | NA | NA | 3.18  | 0.13 |
| 1.9317E-06 | 2.7812E-05 | 1.8532E-06 | NA | NA | 3.81  | 0.18 |
| 3.5967E-06 | 9.2019E-05 | 2.3831E-06 | NA | NA | 12.75 | 0.34 |
| 1.0175E-06 | 2.3403E-05 | 1.2797E-06 | NA | NA | 3.45  | 0.12 |
| 8.83E-07   | 2.2279E-05 | 9.7601E-07 | NA | NA | 3.16  | 0.10 |
| 3.066E-06  | 0.00015146 | 4.6925E-06 | NA | NA | 21.39 | 0.53 |
| 1.1895E-06 | 2.0225E-05 | 8.2139E-07 | NA | NA | 2.73  | 0.10 |
| 8.8251E-07 | 1.5323E-05 | 1.0025E-06 | NA | NA | 2.13  | 0.09 |
| 1.9117E-06 | 1.8679E-05 | 1.1032E-06 | NA | NA | 2.54  | 0.13 |
| 1.4019E-05 | 5.9429E-05 | 9.4481E-06 | NA | NA | 8.15  | 1.00 |
| 1.8312E-06 | 1.9238E-05 | 1.1501E-06 | NA | NA | 2.65  | 0.13 |
| 1.3123E-06 | 1.6702E-05 | 9.4401E-07 | NA | NA | 2.41  | 0.10 |
| 1.1552E-06 | 1.4674E-05 | 1.1585E-06 | NA | NA | 2.13  | 0.11 |
| 1.5738E-06 | 1.5316E-05 | 1.1229E-06 | NA | NA | 2.20  | 0.12 |
| 9.8457E-07 | 9.931E-06  | 1.044E-06  | NA | NA | 1.37  | 0.09 |
| 1.114E-06  | 6.8815E-06 | 6.5457E-07 | NA | NA | 1.06  | 0.08 |
| 8.0958E-07 | 6.4243E-06 | 9.5903E-07 | NA | NA | 0.93  | 0.08 |
| 1.4994E-06 | 2.2311E-05 | 1.2691E-06 | NA | NA | 3.03  | 0.13 |
| 1.6344E-06 | 1.5294E-05 | 6.2381E-07 | NA | NA | 2.20  | 0.10 |
| 1.0984E-06 | 1.122E-05  | 9.4558E-07 | NA | NA | 1.64  | 0.09 |
| 1.4328E-06 | 1.5821E-05 | 1.1911E-06 | NA | NA | 2.25  | 0.12 |
| 1.4517E-06 | 1.2341E-05 | 9.0887E-07 | NA | NA | 1.79  | 0.10 |
| 1.2942E-06 | 1.37E-05   | 6.3317E-07 | NA | NA | 1.84  | 0.09 |
| 1.3237E-06 | 1.3638E-05 | 8.8688E-07 | NA | NA | 1.90  | 0.10 |
| 1.7532E-06 | 1.363E-05  | 1.4753E-06 | NA | NA | 2.09  | 0.14 |
| 1.5073E-06 | 1.6807E-05 | 9.6298E-07 | NA | NA | 2.35  | 0.11 |
| 9.3058E-07 | 1.5373E-05 | 9.102E-07  | NA | NA | 2.25  | 0.09 |
| 4.4647E-06 | 9.7751E-05 | 5.0865E-06 | NA | NA | 13.85 | 0.49 |
| 2.0861E-06 | 2.2583E-05 | 1.1792E-06 | NA | NA | 3.36  | 0.15 |
| 1.7622E-06 | 1.9701E-05 | 1.02E-06   | NA | NA | 2.77  | 0.13 |
| 1.114E-06  | 1.7665E-05 | 1.1672E-06 | NA | NA | 2.32  | 0.11 |
| 1.5507E-06 | 1.7823E-05 | 1.2439E-06 | NA | NA | 2.52  | 0.13 |

|            |            |            |            |            |      |      |
|------------|------------|------------|------------|------------|------|------|
| 1.0015E-06 | 1.0932E-05 | 7.2656E-07 | NA         | NA         | 1.48 | 0.08 |
| 2.1112E-06 | 1.8021E-05 | 2.3038E-06 | NA         | NA         | 2.57 | 0.20 |
| 4.3682E-07 | 7.8354E-06 | 7.8148E-07 | NA         | NA         | 1.12 | 0.06 |
| 1.2481E-06 | 1.2408E-05 | 8.5548E-07 | NA         | NA         | 1.85 | 0.09 |
| 1.6797E-06 | 1.4897E-05 | 1.3023E-06 | 3.8463E-05 | 8.7081E-06 | 2.16 | 0.13 |
| 1.7567E-06 | 2.2929E-05 | 2.0566E-06 | 0.0010628  | 0.00012618 | 3.20 | 0.18 |
| 0.10032266 | 2.5074E-05 | 1.9788E-06 | 0.00028781 | 3.2243E-05 | 3.50 | 0.15 |
| 2.4343E-06 | 2.5708E-05 | 2.4988E-06 | 9.0283E-05 | 1.0764E-05 | 3.27 | 0.22 |
| 1.0846E-06 | 2.3182E-05 | 1.3313E-06 | 5.988E-05  | 8.5202E-06 | 3.10 | 0.12 |
| 1.291E-06  | 1.669E-05  | 1.5226E-06 | 8.1829E-05 | 1.4819E-05 | 2.27 | 0.13 |
| 2.4472E-06 | 1.9318E-05 | 1.1636E-06 | 0.0004319  | 7.8012E-05 | 2.67 | 0.16 |
| 1.293E-06  | 1.4572E-05 | 1.5968E-06 | 0.00012793 | 1.2036E-05 | 2.08 | 0.14 |
| 1.6052E-06 | 1.612E-05  | 1.2242E-06 | 5.0047E-05 | 9.4196E-06 | 2.29 | 0.13 |
| 1.8591E-06 | 1.4288E-05 | 1.1809E-06 | 3.1448E-05 | 6.7619E-06 | 1.98 | 0.13 |
| 1.7351E-06 | 1.6669E-05 | 8.9947E-07 | 4.5119E-05 | 8.1717E-06 | 2.52 | 0.12 |
| 2.2643E-06 | 2.0312E-05 | 1.8548E-06 | 2.7559E-05 | 6.4321E-06 | 2.69 | 0.18 |
| 1.474E-06  | 1.625E-05  | 1.7952E-06 | 2.9125E-05 | 5.5209E-06 | 2.38 | 0.15 |
| 1.9758E-06 | 1.9333E-05 | 1.5571E-06 | 5.0069E-05 | 8.1155E-06 | 2.62 | 0.16 |
| 1.6377E-06 | 1.8957E-05 | 1.7226E-06 | 3.2516E-05 | 5.6896E-06 | 2.72 | 0.16 |
| 2.977E-06  | 2.2095E-05 | 2.7411E-06 | 0.00042558 | 8.0646E-05 | 3.27 | 0.25 |
| 1.4748E-06 | 1.3608E-05 | 8.0651E-07 | 3.3358E-05 | 7.0552E-06 | 1.92 | 0.10 |
| 1.9415E-06 | 1.8204E-05 | 1.1197E-06 | 0.00093285 | 6.5185E-05 | 2.55 | 0.14 |
| 1.3663E-06 | 2.3085E-05 | 1.3833E-06 | 0.00011462 | 1.2281E-05 | 3.10 | 0.13 |
| 3.0499E-06 | 2.6195E-05 | 2.2916E-06 | 5.0923E-05 | 9.6817E-06 | 3.70 | 0.24 |
| 2.2553E-06 | 2.8691E-05 | 2.1513E-06 | 4.5735E-05 | 7.4908E-06 | 3.78 | 0.20 |
| 1.2053E-06 | 2.8141E-05 | 1.6444E-06 | 5.3695E-05 | 9.1685E-06 | 3.81 | 0.15 |
| 2.6948E-06 | 3.0812E-05 | 1.7168E-06 | 0.00017768 | 1.8809E-05 | 4.04 | 0.20 |
| 2.7164E-06 | 2.2381E-05 | 9.9672E-07 | 5.6146E-05 | 6.026E-06  | 3.17 | 0.17 |
| 2.1892E-06 | 2.1217E-05 | 9.5563E-07 | 4.4724E-05 | 9.0793E-06 | 2.98 | 0.14 |
| 1.2037E-06 | 2.3107E-05 | 1.8983E-06 | 4.4436E-05 | 7.5545E-06 | 3.15 | 0.16 |
| 1.2783E-06 | 2.3563E-05 | 1.9748E-06 | 0.00065566 | 6.8103E-05 | 3.62 | 0.17 |
| 3.0579E-06 | 2.3487E-05 | 1.8021E-06 | 0.00024221 | 2.5926E-05 | 3.22 | 0.21 |
| 1.7476E-06 | 1.6638E-05 | 1.5152E-06 | 7.4491E-05 | 1.0976E-05 | 2.26 | 0.15 |
| 1.0497E-06 | 1.061E-05  | 1.0731E-06 | 7.5386E-05 | 8.0551E-06 | 1.49 | 0.10 |
| 1.1793E-06 | 1.7486E-05 | 2.0085E-06 | 4.6212E-05 | 1.0223E-05 | 2.49 | 0.16 |
| 1.1175E-06 | 1.6073E-05 | 1.7776E-06 | 0.00039855 | 4.5121E-05 | 2.33 | 0.14 |
| 1.3057E-06 | 8.6835E-06 | 1.1995E-06 | 0.00020259 | 1.9075E-05 | 1.22 | 0.11 |
| 2.1953E-06 | 1.4133E-05 | 1.5088E-06 | 6.3748E-05 | 1.0116E-05 | 1.93 | 0.16 |
| 2.977E-06  | 2.8612E-05 | 3.323E-06  | 0.00140711 | 0.00016531 | 4.14 | 0.29 |
| 1.5226E-06 | 2.0482E-05 | 8.8614E-07 | NA         | NA         | 2.80 | 0.11 |
| 1.2641E-06 | 2.6981E-05 | 1.634E-06  | NA         | NA         | 3.79 | 0.15 |
| 1.5666E-06 | 2.2035E-05 | 1.1007E-06 | NA         | NA         | 3.16 | 0.13 |

|            |            |            |            |            |       |      |
|------------|------------|------------|------------|------------|-------|------|
| 1.6035E-06 | 2.7632E-05 | 1.1484E-06 | NA         | NA         | 3.95  | 0.14 |
| 1.5413E-06 | 1.4468E-05 | 1.2237E-06 | NA         | NA         | 2.02  | 0.12 |
| 1.1316E-06 | 2.0392E-05 | 1.4592E-06 | NA         | NA         | 2.73  | 0.13 |
| 1.5383E-06 | 2.192E-05  | 1.8532E-06 | NA         | NA         | 2.89  | 0.16 |
| 1.403E-06  | 1.6558E-05 | 1.1282E-06 | NA         | NA         | 2.44  | 0.12 |
| 9.8508E-07 | 1.7067E-05 | 1.2577E-06 | NA         | NA         | 2.30  | 0.11 |
| 1.2451E-06 | 1.9748E-05 | 1.698E-06  | NA         | NA         | 2.68  | 0.14 |
| 1.5187E-06 | 1.6054E-05 | 8.1793E-07 | NA         | NA         | 2.32  | 0.11 |
| 9.542E-07  | 9.1023E-06 | 7.4717E-07 | NA         | NA         | 1.21  | 0.08 |
| 1.048E-06  | 7.4022E-06 | 6.7229E-07 | NA         | NA         | 0.99  | 0.07 |
| 1.6516E-06 | 1.6361E-05 | 1.3762E-06 | NA         | NA         | 2.27  | 0.14 |
| 1.8074E-06 | 1.681E-05  | 1.2551E-06 | NA         | NA         | 2.34  | 0.14 |
| 1.039E-06  | 2.0845E-05 | 1.7301E-06 | NA         | NA         | 2.89  | 0.14 |
| 1.6792E-06 | 2.2201E-05 | 1.2794E-06 | NA         | NA         | 2.99  | 0.14 |
| 1.8627E-06 | 1.9567E-05 | 1.8992E-06 | NA         | NA         | 2.73  | 0.17 |
| 1.3667E-06 | 2.098E-05  | 1.4681E-06 | NA         | NA         | 2.70  | 0.13 |
| 1.4102E-06 | 1.9708E-05 | 1.3666E-06 | NA         | NA         | 2.61  | 0.13 |
| 9.1326E-07 | 2.3722E-05 | 1.0563E-06 | NA         | NA         | 3.35  | 0.11 |
| 1.1837E-06 | 1.9471E-05 | 5.7208E-07 | NA         | NA         | 2.74  | 0.09 |
| 1.4149E-06 | 2.1117E-05 | 1.7129E-06 | NA         | NA         | 2.86  | 0.15 |
| 1.8793E-06 | 1.7898E-05 | 1.6462E-06 | NA         | NA         | 2.40  | 0.16 |
| 4.1526E-06 | 3.6806E-05 | 3.9986E-06 | NA         | NA         | 5.54  | 0.37 |
| 1.3246E-06 | 2.0095E-05 | 1.9249E-06 | NA         | NA         | 2.72  | 0.16 |
| 8.7264E-07 | 1.9711E-05 | 1.6096E-06 | NA         | NA         | 2.68  | 0.13 |
| 8.9501E-07 | 1.5021E-05 | 9.3621E-07 | NA         | NA         | 2.11  | 0.09 |
| 1.8784E-06 | 1.7758E-05 | 1.6508E-06 | NA         | NA         | 2.46  | 0.16 |
| 1.1678E-06 | 1.4899E-05 | 9.9402E-07 | NA         | NA         | 2.12  | 0.10 |
| 1.0104E-06 | 2.0595E-05 | 1.3079E-06 | NA         | NA         | 2.74  | 0.12 |
| 1.1351E-06 | 1.9438E-05 | 1.7188E-06 | NA         | NA         | 2.61  | 0.14 |
| 5.8465E-07 | 1.4698E-05 | 8.5679E-07 | NA         | NA         | 2.14  | 0.08 |
| 1.772E-06  | 1.5276E-05 | 1.0193E-06 | NA         | NA         | 2.18  | 0.12 |
| 2.2754E-06 | 3.0359E-05 | 1.5497E-06 | 0.00056826 | 2.7476E-05 | 4.15  | 0.18 |
| 1.391E-06  | 2.6361E-05 | 1.4125E-06 | 4.0971E-05 | 4.463E-06  | 3.88  | 0.14 |
| 2.0939E-06 | 2.4372E-05 | 1.5674E-06 | 5.346E-05  | 1.8466E-05 | 3.22  | 0.17 |
| 1.8548E-06 | 2.3372E-05 | 1.3816E-06 | 0.00016422 | 1.3295E-05 | 3.40  | 0.15 |
| 3.9285E-06 | 4.8161E-05 | 2.9357E-06 | 0.0021259  | 0.00010071 | 6.37  | 0.31 |
| 5.2315E-06 | 0.00012167 | 3.3953E-06 | 0.00735107 | 0.00015414 | 17.55 | 0.48 |
| 1.8335E-06 | 1.5713E-05 | 1.09E-06   | 0.00011417 | 1.7454E-05 | 2.46  | 0.13 |
| 3.6944E-06 | 4.0579E-05 | 2.8888E-06 | 0.00203902 | 0.00027734 | 5.68  | 0.30 |
| 1.4187E-06 | 2.4497E-05 | 1.5657E-06 | 9.8802E-05 | 1.8829E-05 | 3.27  | 0.15 |
| 1.456E-06  | 2.6637E-05 | 1.8857E-06 | 9.1535E-05 | 1.1357E-05 | 3.81  | 0.17 |
| 2.4199E-06 | 2.832E-05  | 1.5098E-06 | 0.00011767 | 1.0471E-05 | 4.00  | 0.18 |



|            |            |            |            |            |      |      |
|------------|------------|------------|------------|------------|------|------|
| 2.1058E-06 | 2.2057E-05 | 1.716E-06  | 4.4448E-05 | 8.0016E-06 | 3.15 | 0.17 |
| 1.501E-06  | 2.4309E-05 | 1.7043E-06 | 2.2199E-05 | 6.6357E-06 | 3.52 | 0.16 |
| 1.6207E-06 | 2.0581E-05 | 1.1838E-06 | 9.3629E-05 | 1.2808E-05 | 3.15 | 0.13 |
| 1.7458E-06 | 2.4352E-05 | 1.372E-06  | 3.4864E-05 | 5.5907E-06 | 3.49 | 0.15 |
| 1.8806E-06 | 3.0953E-05 | 1.9555E-06 | 0.00140232 | 0.00013804 | 4.10 | 0.18 |
| 2.2948E-06 | 2.5368E-05 | 8.0154E-07 | 0.00020177 | 9.9924E-06 | 3.58 | 0.15 |
| 1.7957E-06 | 2.5394E-05 | 1.7763E-06 | 3.5342E-05 | 4.8445E-06 | 3.50 | 0.17 |
| 2.1304E-06 | 3.1906E-05 | 1.5164E-06 | 3.6395E-05 | 8.6889E-06 | 4.07 | 0.17 |
| 2.4307E-06 | 2.6636E-05 | 1.9021E-06 | 0.00054395 | 2.6875E-05 | 3.93 | 0.20 |
| 1.3372E-06 | 2.3112E-05 | 1.0799E-06 | 6.0695E-05 | 7.4372E-06 | 3.30 | 0.12 |
| 0.04754659 | 2.4348E-05 | 2.1691E-06 | 2.5925E-05 | 4.1353E-06 | 3.39 | 0.16 |
| 2.1264E-06 | 2.5897E-05 | 1.725E-06  | 5.644E-05  | 1.1435E-05 | 3.59 | 0.18 |
| 2.6392E-05 | 5.606E-05  | 1.759E-05  | 0.00073446 | 5.1774E-05 | 8.14 | 1.85 |
| 2.095E-06  | 2.4253E-05 | 8.7951E-07 | 4.989E-05  | 5.1234E-06 | 3.51 | 0.14 |
| 1.6986E-06 | 2.7292E-05 | 2.0018E-06 | 0.00019069 | 1.1484E-05 | 3.80 | 0.18 |
| 1.956E-06  | 5.3341E-05 | 2.5104E-06 | 0.0464636  | 0.00049943 | 7.11 | 0.24 |
| 1.3625E-06 | 3.0189E-05 | 2.205E-06  | 0.00133077 | 6.481E-05  | 4.26 | 0.19 |
| 3.1884E-06 | 2.4949E-05 | 1.6699E-06 | 0.00022406 | 3.1847E-05 | 3.56 | 0.21 |
| 2.4212E-06 | 2.8836E-05 | 1.6396E-06 | 8.7464E-05 | 6.0882E-06 | 4.32 | 0.19 |
| 2.9049E-06 | 3.51E-05   | 2.087E-06  | 0.00140301 | 4.7134E-05 | 4.77 | 0.23 |
| 2.1621E-06 | 2.7309E-05 | 1.3234E-06 | 3.6083E-05 | 5.9667E-06 | 3.90 | 0.16 |
| 2.7383E-06 | 2.8919E-05 | 1.6168E-06 | 0.00013818 | 2.3649E-05 | 4.14 | 0.20 |
| 1.8408E-06 | 2.9181E-05 | 1.1797E-06 | 8.3859E-05 | 1.5986E-05 | 3.97 | 0.15 |
| 2.0533E-06 | 2.7514E-05 | 1.0509E-06 | 0.00014212 | 9.9351E-06 | 3.71 | 0.15 |
| 2.0133E-06 | 1.3705E-05 | 1.167E-06  | 0.00020157 | 2.5381E-05 | 2.03 | 0.14 |
| 1.2325E-06 | 2.0359E-05 | 1.5162E-06 | 2.9269E-05 | 7.6558E-06 | 3.04 | 0.14 |
| 1.9497E-06 | 2.9506E-05 | 1.7936E-06 | 0.0002396  | 3.2787E-05 | 3.68 | 0.18 |
| 2.1314E-06 | 2.6307E-05 | 1.6709E-06 | 0.00039619 | 3.7123E-05 | 3.99 | 0.18 |
| 1.2501E-06 | 2.5631E-05 | 1.8016E-06 | 0.00079111 | 0.00010853 | 3.51 | 0.16 |
| 1.6544E-06 | 2.9444E-05 | 2.5104E-06 | 3.0522E-05 | 6.3312E-06 | 4.00 | 0.21 |
| 1.63E-06   | 2.6683E-05 | 2.2999E-06 | 0.0002151  | 2.6031E-05 | 3.76 | 0.20 |
| 1.6992E-06 | 2.5191E-05 | 1.6711E-06 | 3.2755E-05 | 5.928E-06  | 3.52 | 0.16 |
| 2.1216E-06 | 2.1399E-05 | 1.1065E-06 | 0.00018435 | 1.7542E-05 | 3.16 | 0.15 |
| 2.1301E-06 | 2.8605E-05 | 2.4496E-06 | 8.0329E-05 | 1.3504E-05 | 3.89 | 0.22 |
| 2.2949E-06 | 2.8146E-05 | 1.3789E-06 | 0.00029635 | 2.444E-05  | 4.02 | 0.17 |
| 3.554E-06  | 6.4306E-05 | 2.8561E-06 | 0.00122664 | 6.3074E-05 | 9.12 | 0.32 |
| 1.7396E-06 | 1.246E-05  | 8.6804E-07 | 0.00013438 | 1.1407E-05 | 1.84 | 0.11 |
| 2.2127E-06 | 2.1087E-05 | 1.513E-06  | 0.00011954 | 2.0824E-05 | 3.16 | 0.17 |
| 2.9554E-06 | 2.8166E-05 | 1.2347E-06 | 5.9408E-05 | 1.3468E-05 | 3.78 | 0.19 |
| 2.3899E-06 | 2.7173E-05 | 2.3692E-06 | 0.00016826 | 3.8831E-05 | 3.93 | 0.22 |
| 2.2901E-06 | 2.3234E-05 | 1.3772E-06 | 0.00024116 | 4.8068E-05 | 3.36 | 0.16 |
| 7.5466E-07 | 2.1041E-05 | 2.1492E-06 | 2.6157E-05 | 5.4337E-06 | 3.19 | 0.17 |

|            |            |            |            |            |       |      |
|------------|------------|------------|------------|------------|-------|------|
| 1.4533E-06 | 3.7214E-05 | 1.8086E-06 | 0.18653648 | 0.00569684 | 5.09  | 0.17 |
| 1.9018E-06 | 2.9936E-05 | 1.968E-06  | 0.00012598 | 2.1594E-05 | 4.10  | 0.19 |
| 2.4363E-06 | 2.3754E-05 | 1.5316E-06 | 7.2523E-05 | 1.4038E-05 | 3.56  | 0.18 |
| 4.3614E-06 | 7.8844E-05 | 2.4141E-06 | 6.3175E-05 | 1.3422E-05 | 10.82 | 0.34 |
| 5.658E-06  | 5.626E-05  | 2.3552E-06 | 0.01082727 | 0.00201125 | 8.08  | 0.37 |
| 1.1487E-06 | 2.9245E-05 | 2.1534E-06 | 0.00022187 | 2.1E-05    | 4.02  | 0.18 |
| 2.3005E-06 | 2.6052E-05 | 1.646E-06  | 2.5907E-05 | 6.5056E-06 | 3.78  | 0.18 |
| 2.1624E-06 | 2.2427E-05 | 1.4727E-06 | 6.6229E-05 | 1.04E-05   | 3.62  | 0.17 |
| 2.1572E-06 | 2.9975E-05 | 2.1594E-06 | 8.0368E-05 | 1.2024E-05 | 4.45  | 0.21 |
| 2.468E-06  | 2.7524E-05 | 1.288E-06  | 0.00042181 | 4.9384E-05 | 4.18  | 0.17 |
| 2.0348E-06 | 2.5338E-05 | 1.7848E-06 | 0.0007706  | 2.8165E-05 | 3.79  | 0.18 |
| 3.4098E-06 | 5.558E-05  | 3.392E-06  | 0.00118471 | 7.3899E-05 | 7.87  | 0.33 |
| 3.9954E-06 | 3.7122E-05 | 1.1483E-06 | 0.00028653 | 2.6779E-05 | 4.70  | 0.24 |
| 6.7425E-06 | 3.2575E-05 | 4.9326E-06 | 0.00040265 | 6.0864E-05 | 4.44  | 0.50 |
| 1.2699E-06 | 1.3765E-05 | 1.4042E-06 | 0.00025998 | 3.0079E-05 | 1.81  | 0.12 |
| 1.3969E-06 | 1.1213E-05 | 1.099E-06  | 0.00052998 | 5.3015E-05 | 1.60  | 0.11 |
| 2.1465E-06 | 1.9897E-05 | 9.7953E-07 | 0.00010925 | 1.6723E-05 | 2.77  | 0.14 |
| 1.6543E-06 | 2.0119E-05 | 9.1491E-07 | 0.00016405 | 2.088E-05  | 2.85  | 0.12 |
| 1.6163E-06 | 1.5261E-05 | 1.1075E-06 | 3.8428E-05 | 7.7978E-06 | 2.45  | 0.12 |
| 1.1149E-05 | 6.2453E-05 | 8.3312E-06 | 0.00366088 | 0.00046731 | 8.86  | 0.84 |
| 1.0252E-06 | 1.1005E-05 | 1.1453E-06 | 4.7996E-05 | 8.9745E-06 | 1.63  | 0.10 |
| 1.0479E-05 | 4.0253E-05 | 7.7482E-06 | 0.00463154 | 0.00118191 | 5.69  | 0.78 |
| 3.1348E-06 | 3.3835E-05 | 3.887E-06  | 0.00179155 | 0.00023757 | 4.81  | 0.33 |
| 7.0302E-07 | 1.4628E-05 | 1.221E-06  | 0.0001081  | 1.3144E-05 | 1.90  | 0.10 |
| 1.7195E-06 | 1.6034E-05 | 9.9545E-07 | 0.00023959 | 2.3571E-05 | 2.31  | 0.12 |
| 1.1676E-06 | 1.0126E-05 | 7.7835E-07 | NA         | NA         | 1.39  | 0.09 |
| 1.6022E-06 | 1.5317E-05 | 5.5413E-07 | NA         | NA         | 2.02  | 0.10 |
| 5.8435E-06 | 0.00011668 | 5.395E-06  | NA         | NA         | 16.40 | 0.57 |
| 2.2451E-06 | 2.4285E-05 | 1.6788E-06 | NA         | NA         | 3.57  | 0.18 |
| 5.7949E-05 | 0.00034959 | 4.5325E-05 | NA         | NA         | 49.84 | 4.47 |
| 9.7579E-07 | 1.0887E-05 | 6.6249E-07 | NA         | NA         | 1.50  | 0.07 |
| 9.2325E-07 | 2.4742E-05 | 1.2002E-06 | NA         | NA         | 3.44  | 0.12 |
| 1.0333E-06 | 1.3127E-05 | 1.0958E-06 | NA         | NA         | 1.92  | 0.10 |
| 6.9418E-07 | 2.4342E-05 | 1.9827E-06 | NA         | NA         | 3.65  | 0.16 |
| 8.2334E-07 | 6.38E-06   | 1.0732E-06 | NA         | NA         | 0.94  | 0.09 |
| 2.5953E-06 | 6.5697E-05 | 2.4116E-06 | NA         | NA         | 9.35  | 0.27 |
| 3.8527E-06 | 0.00015244 | 4.4492E-06 | NA         | NA         | 21.33 | 0.53 |
| 1.111E-06  | 2.1507E-05 | 1.5117E-06 | NA         | NA         | 2.98  | 0.13 |
| 8.9383E-07 | 7.9569E-06 | 1.0424E-06 | NA         | NA         | 1.10  | 0.09 |
| 8.9747E-07 | 1.3183E-05 | 6.9292E-07 | NA         | NA         | 1.78  | 0.07 |
| 6.9165E-07 | 1.444E-05  | 8.9857E-07 | NA         | NA         | 2.13  | 0.08 |
| 2.4527E-06 | 2.8609E-05 | 1.6201E-06 | NA         | NA         | 4.09  | 0.19 |

|            |            |            |            |            |      |      |
|------------|------------|------------|------------|------------|------|------|
| 1.9961E-06 | 2.7899E-05 | 9.7653E-07 | NA         | NA         | 3.80 | 0.14 |
| 1.4383E-06 | 2.3349E-05 | 1.1433E-06 | NA         | NA         | 2.97 | 0.12 |
| 1.5451E-06 | 1.7864E-05 | 7.464E-07  | NA         | NA         | 2.41 | 0.10 |
| 3.9911E-06 | 1.7495E-05 | 2.1769E-06 | NA         | NA         | 2.61 | 0.26 |
| 4.4288E-07 | 8.1655E-06 | 6.9461E-07 | NA         | NA         | 1.08 | 0.06 |
| 1.0041E-06 | 1.882E-05  | 7.5001E-07 | NA         | NA         | 2.69 | 0.09 |
| 1.3777E-06 | 1.039E-05  | 7.7746E-07 | NA         | NA         | 1.48 | 0.09 |
| 6.1638E-07 | 1.1818E-05 | 1.0121E-06 | NA         | NA         | 1.42 | 0.08 |
| 4.7986E-06 | 1.9508E-05 | 1.3018E-06 | 0.00045087 | 8.9732E-05 | 3.06 | 0.27 |
| 1.3938E-06 | 1.3265E-05 | 1.2165E-06 | 7.2165E-05 | 1.1187E-05 | 1.83 | 0.12 |
| 1.2967E-06 | 1.8355E-05 | 2.1069E-06 | 0.00010827 | 1.685E-05  | 2.46 | 0.17 |
| 1.6576E-06 | 1.2746E-05 | 1.6864E-06 | 0.00036653 | 2.4047E-05 | 1.75 | 0.15 |
| 1.5602E-06 | 2.1062E-05 | 2.0382E-06 | 3.2019E-05 | 7.8095E-06 | 3.01 | 0.17 |
| 1.7912E-06 | 1.1682E-05 | 1.126E-06  | 0.00018762 | 2.8757E-05 | 1.54 | 0.13 |
| 1.9911E-06 | 2.3224E-05 | 1.2777E-06 | 0.00020638 | 1.9028E-05 | 3.27 | 0.15 |
| 2.894E-06  | 2.1466E-05 | 2.3984E-06 | 0.0002466  | 3.2888E-05 | 3.21 | 0.23 |
| 1.5706E-06 | 1.9658E-05 | 1.1076E-06 | 0.00042307 | 2.1888E-05 | 2.93 | 0.12 |
| 2.8605E-06 | 1.6599E-05 | 1.0476E-06 | 0.00020693 | 2.9396E-05 | 2.25 | 0.17 |
| 2.0756E-06 | 2.4739E-05 | 1.6401E-06 | 7.4126E-05 | 7.9577E-06 | 3.17 | 0.17 |
| 2.048E-06  | 2.0376E-05 | 1.3409E-06 | 4.1714E-05 | 6.8974E-06 | 2.99 | 0.15 |
| 2.0575E-06 | 2.1951E-05 | 1.6328E-06 | 0.00029405 | 4.0656E-05 | 2.95 | 0.17 |
| 1.5555E-06 | 1.496E-05  | 9.536E-07  | 0.00016191 | 1.1727E-05 | 2.08 | 0.11 |
| 7.5924E-07 | 1.1692E-05 | 8.1621E-07 | 7.7811E-05 | 7.2192E-06 | 1.77 | 0.08 |
| 1.1551E-06 | 1.5669E-05 | 1.0362E-06 | 0.00017576 | 1.5633E-05 | 2.16 | 0.10 |
| 8.2105E-07 | 1.1546E-05 | 9.0061E-07 | 4.0672E-05 | 6.37E-06   | 1.74 | 0.08 |
| 1.0799E-06 | 2.5315E-05 | 8.7066E-07 | 0.00017122 | 1.5344E-05 | 3.36 | 0.10 |
| 1.038E-06  | 1.2724E-05 | 7.4316E-07 | 4.6063E-05 | 6.1262E-06 | 1.79 | 0.08 |
| 7.7046E-07 | 1.7389E-05 | 8.9448E-07 | 3.9437E-05 | 3.5081E-06 | 2.49 | 0.09 |
| 1.4339E-06 | 1.7235E-05 | 1.457E-06  | 0.000133   | 2.2181E-05 | 2.37 | 0.13 |
| 1.486E-06  | 7.0246E-06 | 8.5924E-07 | 0.00034269 | 0.00013127 | 1.11 | 0.10 |
| 8.4231E-07 | 1.0188E-05 | 9.5161E-07 | 6.787E-05  | 9.176E-06  | 1.39 | 0.08 |
| 1.2253E-06 | 8.5051E-06 | 5.2267E-07 | 4.583E-05  | 6.8586E-06 | 1.43 | 0.08 |
| 8.5762E-07 | 9.0074E-06 | 8.9675E-07 | 0.00022509 | 3.4794E-05 | 1.30 | 0.08 |
| 7.9496E-07 | 6.89E-06   | 7.7376E-07 | 5.8076E-05 | 6.9622E-06 | 1.01 | 0.07 |
| 2.7674E-06 | 1.534E-05  | 2.6809E-06 | 0.00167905 | 0.00016306 | 2.25 | 0.24 |
| 1.5965E-06 | 1.3951E-05 | 1.1144E-06 | 0.00028208 | 5.1413E-05 | 2.46 | 0.12 |
| 1.2166E-06 | 6.1259E-06 | 5.2007E-07 | 9.8522E-05 | 1.1127E-05 | 1.00 | 0.07 |
| 1.7995E-06 | 9.8778E-06 | 1.0383E-06 | 8.3819E-05 | 5.6194E-06 | 1.42 | 0.12 |
| 6.7129E-07 | 8.2241E-06 | 9.1487E-07 | 8.3261E-05 | 8.3388E-06 | 1.09 | 0.08 |
| 7.4518E-07 | 8.2193E-06 | 1.1918E-06 | 0.00011707 | 1.3834E-05 | 1.35 | 0.10 |
| 1.7257E-06 | 1.0308E-05 | 9.118E-07  | 6.5507E-05 | 1.8636E-05 | 1.59 | 0.11 |
| 1.3882E-06 | 9.5056E-06 | 1.0107E-06 | 9.5738E-05 | 7.0988E-06 | 1.40 | 0.10 |

|            |            |            |            |            |       |      |
|------------|------------|------------|------------|------------|-------|------|
| 1.4219E-06 | 1.0666E-05 | 8.8997E-07 | 0.00038684 | 4.1878E-05 | 1.68  | 0.10 |
| 1.4409E-06 | 1.1324E-05 | 9.0451E-07 | 0.00010502 | 1.3955E-05 | 1.85  | 0.10 |
| 9.5016E-07 | 9.0343E-06 | 3.5251E-07 | 4.6238E-05 | 5.2818E-06 | 1.31  | 0.06 |
| 1.0493E-05 | 6.6734E-05 | 1.0765E-05 | 0.00048075 | 9.1295E-05 | 9.12  | 0.95 |
| 8.6418E-07 | 1.8158E-05 | 1.45E-06   | NA         | NA         | 2.52  | 0.12 |
| 9.4661E-07 | 1.9469E-05 | 1.3545E-06 | NA         | NA         | 2.78  | 0.12 |
| 1.2704E-06 | 1.7403E-05 | 1.159E-06  | NA         | NA         | 2.37  | 0.11 |
| 1.8368E-06 | 2.1024E-05 | 1.0235E-06 | NA         | NA         | 2.89  | 0.13 |
| 7.9895E-07 | 1.3729E-05 | 1.0457E-06 | NA         | NA         | 1.90  | 0.09 |
| 7.8568E-07 | 1.1135E-05 | 8.8619E-07 | NA         | NA         | 1.52  | 0.08 |
| 1.1143E-06 | 1.6428E-05 | 1.2547E-06 | NA         | NA         | 2.17  | 0.11 |
| 8.2676E-07 | 1.876E-05  | 1.0113E-06 | NA         | NA         | 2.46  | 0.09 |
| 1.1211E-06 | 1.7235E-05 | 1.0013E-06 | NA         | NA         | 2.31  | 0.10 |
| 1.5613E-05 | 0.00010249 | 1.4124E-05 | NA         | NA         | 14.08 | 1.31 |
| 1.2651E-06 | 1.7171E-05 | 1.0893E-06 | NA         | NA         | 2.36  | 0.11 |
| 1.1788E-06 | 2.0719E-05 | 1.0037E-06 | NA         | NA         | 2.75  | 0.11 |
| 1.7099E-06 | 1.9206E-05 | 1.4522E-06 | NA         | NA         | 2.70  | 0.14 |
| 1.4222E-06 | 1.0786E-05 | 5.0196E-07 | NA         | NA         | 1.50  | 0.09 |
| 9.2741E-07 | 1.3691E-05 | 1.0358E-06 | NA         | NA         | 1.85  | 0.09 |
| 1.4494E-06 | 1.196E-05  | 6.241E-07  | NA         | NA         | 1.98  | 0.09 |
| 9.6123E-07 | 5.2795E-06 | 7.9207E-07 | NA         | NA         | 0.78  | 0.08 |
| 8.2976E-07 | 7.5188E-06 | 7.8178E-07 | NA         | NA         | 1.06  | 0.07 |
| 1.0309E-06 | 9.7681E-06 | 1.0261E-06 | NA         | NA         | 1.40  | 0.09 |
| 1.4464E-06 | 1.4973E-05 | 1.4503E-06 | NA         | NA         | 2.11  | 0.13 |
| 1.0988E-06 | 1.6837E-05 | 1.1226E-06 | NA         | NA         | 2.46  | 0.11 |
| 1.4606E-06 | 2.3622E-05 | 1.1776E-06 | NA         | NA         | 3.21  | 0.13 |
| 1.1172E-06 | 2.4207E-05 | 1.3505E-06 | NA         | NA         | 3.23  | 0.13 |
| 1.3402E-06 | 2.2006E-05 | 1.3105E-06 | NA         | NA         | 3.04  | 0.13 |
| 2.1258E-06 | 2.2088E-05 | 2.3854E-06 | NA         | NA         | 3.17  | 0.21 |
| 1.9553E-06 | 2.7059E-05 | 1.8587E-06 | NA         | NA         | 3.66  | 0.18 |
| 1.916E-06  | 3.0897E-05 | 1.6941E-06 | NA         | NA         | 4.19  | 0.17 |
| 1.2155E-06 | 2.3371E-05 | 1.2438E-06 | NA         | NA         | 3.30  | 0.12 |
| 1.0546E-06 | 2.2615E-05 | 1.0921E-06 | NA         | NA         | 3.20  | 0.11 |
| 9.9944E-07 | 1.0213E-05 | 8.0371E-07 | NA         | NA         | 1.42  | 0.08 |
| 2.4078E-06 | 1.9173E-05 | 1.1652E-06 | NA         | NA         | 2.68  | 0.16 |
| 1.2149E-06 | 1.5706E-05 | 6.7048E-07 | NA         | NA         | 2.29  | 0.09 |
| 9.6944E-07 | 1.047E-05  | 1.1635E-06 | NA         | NA         | 1.45  | 0.10 |
| 1.1252E-06 | 1.6841E-05 | 1.4696E-06 | 3.9567E-05 | 5.5614E-06 | 2.17  | 0.13 |
| 1.1726E-06 | 1.4276E-05 | 1.0423E-06 | 3.6791E-05 | 8.0286E-06 | 2.07  | 0.10 |
| 1.1878E-06 | 1.1694E-05 | 8.4208E-07 | 3.1469E-05 | 4.4099E-06 | 1.82  | 0.09 |
| 1.2261E-06 | 1.2107E-05 | 5.9337E-07 | 3.3397E-05 | 4.6533E-06 | 1.97  | 0.08 |
| 1.7264E-06 | 1.3043E-05 | 1.1822E-06 | 0.00019525 | 1.4775E-05 | 2.07  | 0.13 |

|            |            |            |            |            |       |      |
|------------|------------|------------|------------|------------|-------|------|
| 8.7824E-07 | 1.0972E-05 | 1.2943E-06 | 0.00014859 | 2.5841E-05 | 1.77  | 0.11 |
| 1.3156E-06 | 1.1371E-05 | 1.0645E-06 | 7.4907E-05 | 1.6489E-05 | 1.78  | 0.11 |
| 1.041E-06  | 1.0299E-05 | 8.5881E-07 | 3.2949E-05 | 5.838E-06  | 1.60  | 0.09 |
| 1.5006E-06 | 1.0318E-05 | 7.1669E-07 | 4.4008E-05 | 7.6432E-06 | 1.60  | 0.10 |
| 9.6559E-07 | 1.1882E-05 | 1.2435E-06 | 0.00023396 | 3.3827E-05 | 1.90  | 0.11 |
| 1.2847E-06 | 1.1386E-05 | 8.8527E-07 | 4.2541E-05 | 6.6585E-06 | 1.77  | 0.10 |
| 1.0725E-06 | 1.3127E-05 | 1.347E-06  | 0.00013703 | 1.4268E-05 | 2.00  | 0.12 |
| 1.7312E-06 | 1.2655E-05 | 8.3072E-07 | 4.8852E-05 | 1.1276E-05 | 2.08  | 0.11 |
| 1.0146E-06 | 1.4028E-05 | 1.0029E-06 | 3.7168E-05 | 3.2666E-06 | 2.21  | 0.10 |
| 1.1407E-06 | 1.5677E-05 | 1.0733E-06 | 4.9625E-05 | 1.0825E-05 | 2.39  | 0.11 |
| 1.2985E-06 | 1.3559E-05 | 1.0796E-06 | 5.5498E-05 | 5.4011E-06 | 2.18  | 0.11 |
| 1.4353E-06 | 1.4657E-05 | 9.0834E-07 | 0.0002005  | 4.0731E-05 | 2.12  | 0.11 |
| 1.4256E-06 | 1.5714E-05 | 1.1259E-06 | 0.00019379 | 3.7378E-05 | 2.34  | 0.12 |
| 1.154E-06  | 1.2452E-05 | 1.5694E-06 | 9.9298E-05 | 1.2352E-05 | 2.08  | 0.13 |
| 1.4064E-06 | 2.0129E-05 | 8.6983E-07 | NA         | NA         | 3.01  | 0.11 |
| 1.4202E-06 | 1.5104E-05 | 1.2424E-06 | NA         | NA         | 2.24  | 0.12 |
| 1.0703E-06 | 1.738E-05  | 1.1085E-06 | NA         | NA         | 2.49  | 0.11 |
| 1.1244E-06 | 1.7027E-05 | 9.423E-07  | NA         | NA         | 2.38  | 0.10 |
| 2.2487E-06 | 2.3869E-05 | 1.1752E-06 | NA         | NA         | 3.45  | 0.16 |
| 9.2835E-07 | 1.263E-05  | 9.2136E-07 | NA         | NA         | 2.02  | 0.09 |
| 1.2196E-06 | 1.521E-05  | 1.4702E-06 | NA         | NA         | 2.26  | 0.13 |
| 1.2505E-06 | 1.4294E-05 | 1.3018E-06 | NA         | NA         | 2.02  | 0.12 |
| 7.8007E-07 | 4.9518E-06 | 3.7315E-07 | NA         | NA         | 0.88  | 0.05 |
| 1.0693E-06 | 6.9043E-06 | 1.0711E-06 | NA         | NA         | 1.00  | 0.10 |
| 1.1E-06    | 9.176E-06  | 9.9809E-07 | NA         | NA         | 1.25  | 0.09 |
| 1.1808E-06 | 9.7806E-06 | 6.5599E-07 | NA         | NA         | 1.33  | 0.08 |
| 1.3419E-06 | 1.4106E-05 | 7.9214E-07 | NA         | NA         | 2.05  | 0.10 |
| 1.5613E-06 | 1.5396E-05 | 8.9342E-07 | NA         | NA         | 2.11  | 0.11 |
| 1.2895E-06 | 1.8884E-05 | 9.6444E-07 | NA         | NA         | 2.71  | 0.11 |
| 1.5406E-06 | 1.8381E-05 | 1.2599E-06 | NA         | NA         | 2.55  | 0.13 |
| 1.4267E-06 | 2.3496E-05 | 1.3504E-06 | NA         | NA         | 3.14  | 0.13 |
| 9.6269E-07 | 1.5139E-05 | 9.7405E-07 | NA         | NA         | 2.22  | 0.09 |
| 1.7072E-06 | 2.2169E-05 | 1.6442E-06 | NA         | NA         | 3.17  | 0.16 |
| 1.2514E-06 | 1.7157E-05 | 5.2629E-07 | NA         | NA         | 2.38  | 0.09 |
| 1.2805E-06 | 1.2042E-05 | 1.2357E-06 | NA         | NA         | 1.69  | 0.11 |
| 1.4081E-06 | 1.6392E-05 | 1.2122E-06 | NA         | NA         | 2.56  | 0.12 |
| 1.4824E-06 | 2.1583E-05 | 1.3574E-06 | NA         | NA         | 2.76  | 0.13 |
| 1.3723E-06 | 2.142E-05  | 1.0584E-06 | NA         | NA         | 2.91  | 0.12 |
| 4.6761E-05 | 8.8905E-05 | 3.1776E-05 | NA         | NA         | 13.29 | 3.31 |
| 4.9394E-07 | 8.8866E-06 | 4.9984E-07 | NA         | NA         | 1.17  | 0.05 |
| 9.4038E-07 | 1.118E-05  | 1.0923E-06 | NA         | NA         | 1.53  | 0.10 |
| 8.7143E-07 | 9.2191E-06 | 8.5426E-07 | NA         | NA         | 1.29  | 0.08 |

|            |            |            |    |    |       |      |
|------------|------------|------------|----|----|-------|------|
| 2.0293E-06 | 1.1914E-05 | 1.2932E-06 | NA | NA | 1.75  | 0.14 |
| 8.9266E-07 | 8.6133E-06 | 1.1476E-06 | NA | NA | 1.31  | 0.10 |
| 3.1726E-06 | 1.7025E-05 | 2.9151E-06 | NA | NA | 2.50  | 0.27 |
| 3.8739E-06 | 4.2363E-05 | 2.0364E-06 | NA | NA | 6.11  | 0.27 |
| 1.4335E-06 | 1.352E-05  | 1.0168E-06 | NA | NA | 1.97  | 0.11 |
| 1.6022E-06 | 1.6081E-05 | 9.3578E-07 | NA | NA | 2.24  | 0.11 |
| 9.5649E-07 | 1.1664E-05 | 8.9402E-07 | NA | NA | 1.69  | 0.09 |
| 1.3355E-06 | 1.3382E-05 | 9.9754E-07 | NA | NA | 1.79  | 0.10 |
| 1.5085E-06 | 1.137E-05  | 9.0527E-07 | NA | NA | 1.51  | 0.10 |
| 7.8097E-07 | 1.0445E-05 | 1.0811E-06 | NA | NA | 1.45  | 0.09 |
| 1.0726E-06 | 1.1221E-05 | 9.8399E-07 | NA | NA | 1.53  | 0.09 |
| 9.4622E-07 | 1.0355E-05 | 1.2363E-06 | NA | NA | 1.37  | 0.10 |
| 1.492E-06  | 4.3107E-05 | 2.2626E-06 | NA | NA | 6.13  | 0.21 |
| 2.0075E-06 | 2.1871E-05 | 1.2382E-06 | NA | NA | 3.08  | 0.15 |
| 1.0468E-06 | 1.0759E-05 | 9.4192E-07 | NA | NA | 1.50  | 0.09 |
| 9.4904E-07 | 1.16E-05   | 1.2881E-06 | NA | NA | 1.70  | 0.11 |
| 8.8634E-07 | 1.3393E-05 | 1.0966E-06 | NA | NA | 1.77  | 0.10 |
| 9.3403E-07 | 1.5477E-05 | 8.6665E-07 | NA | NA | 2.15  | 0.09 |
| 1.2202E-06 | 1.6413E-05 | 1.3198E-06 | NA | NA | 2.30  | 0.12 |
| 1.3066E-06 | 1.5623E-05 | 1.1463E-06 | NA | NA | 2.13  | 0.11 |
| 1.0518E-06 | 1.4562E-05 | 1.2638E-06 | NA | NA | 1.95  | 0.11 |
| 1.9075E-06 | 1.7272E-05 | 1.6753E-06 | NA | NA | 2.52  | 0.16 |
| 1.4426E-06 | 1.6212E-05 | 8.7025E-07 | NA | NA | 2.20  | 0.10 |
| 6.9667E-07 | 1.0061E-05 | 6.1713E-07 | NA | NA | 1.48  | 0.06 |
| 8.2863E-07 | 1.4046E-05 | 1.2558E-06 | NA | NA | 1.93  | 0.10 |
| 2.0235E-06 | 1.7214E-05 | 1.0831E-06 | NA | NA | 2.46  | 0.14 |
| 8.5949E-07 | 2.2893E-05 | 1.7024E-06 | NA | NA | 3.20  | 0.14 |
| 1.5828E-06 | 1.4306E-05 | 1.2221E-06 | NA | NA | 1.96  | 0.12 |
| 1.0645E-06 | 1.0263E-05 | 7.0623E-07 | NA | NA | 1.42  | 0.08 |
| 5.4882E-07 | 1.1031E-05 | 4.9581E-07 | NA | NA | 1.53  | 0.05 |
| 1.3571E-05 | 9.3419E-05 | 1.0793E-05 | NA | NA | 13.07 | 1.06 |
| 6.966E-07  | 6.4693E-06 | 8.1042E-07 | NA | NA | 0.98  | 0.07 |
| 7.9364E-06 | 2.5409E-05 | 2.2292E-06 | NA | NA | 3.74  | 0.44 |
| 1.5447E-06 | 1.509E-05  | 1.2012E-06 | NA | NA | 2.20  | 0.12 |
| 1.5077E-06 | 1.9687E-05 | 9.7558E-07 | NA | NA | 2.74  | 0.11 |
| 1.1155E-06 | 2.0293E-05 | 7.8774E-07 | NA | NA | 2.88  | 0.10 |
| 1.4233E-06 | 2.0317E-05 | 1.25E-06   | NA | NA | 2.83  | 0.13 |
| 2.0948E-06 | 2.0648E-05 | 1.4152E-06 | NA | NA | 2.81  | 0.16 |
| 1.7812E-06 | 2.1244E-05 | 1.3287E-06 | NA | NA | 3.11  | 0.14 |
| 1.7081E-06 | 3.0891E-05 | 1.8147E-06 | NA | NA | 4.18  | 0.17 |
| 1.433E-06  | 2.3657E-05 | 2.3957E-06 | NA | NA | 3.16  | 0.19 |
| 1.9032E-06 | 1.6383E-05 | 1.5988E-06 | NA | NA | 2.42  | 0.16 |

|            |            |            |    |    |       |      |
|------------|------------|------------|----|----|-------|------|
| 1.6038E-06 | 2.0662E-05 | 1.1136E-06 | NA | NA | 3.16  | 0.13 |
| 1.009E-06  | 2.1397E-05 | 1.4852E-06 | NA | NA | 2.80  | 0.13 |
| 1.328E-06  | 1.9245E-05 | 1.1774E-06 | NA | NA | 2.55  | 0.12 |
| 1.119E-06  | 1.8197E-05 | 1.2448E-06 | NA | NA | 2.67  | 0.12 |
| 1.423E-06  | 2.06E-05   | 1.0644E-06 | NA | NA | 2.78  | 0.12 |
| 1.2516E-06 | 1.9042E-05 | 1.2527E-06 | NA | NA | 2.78  | 0.12 |
| 1.0949E-06 | 1.8319E-05 | 1.135E-06  | NA | NA | 2.66  | 0.11 |
| 1.6621E-06 | 2.1954E-05 | 1.2369E-06 | NA | NA | 3.11  | 0.13 |
| 1.8434E-06 | 1.7269E-05 | 1.1577E-06 | NA | NA | 2.34  | 0.13 |
| 1.5979E-06 | 1.8874E-05 | 1.1038E-06 | NA | NA | 2.75  | 0.12 |
| 1.8172E-06 | 1.9506E-05 | 7.7111E-07 | NA | NA | 2.73  | 0.12 |
| 2.0474E-06 | 2.371E-05  | 1.9503E-06 | NA | NA | 3.39  | 0.18 |
| 1.0289E-06 | 2.3555E-05 | 1.1691E-06 | NA | NA | 3.49  | 0.12 |
| 1.7677E-06 | 2.3625E-05 | 1.5693E-06 | NA | NA | 3.61  | 0.16 |
| 1.26E-06   | 2.8445E-05 | 1.5747E-06 | NA | NA | 3.81  | 0.15 |
| 1.8965E-06 | 2.387E-05  | 1.0193E-06 | NA | NA | 3.53  | 0.14 |
| 1.3849E-06 | 2.6855E-05 | 9.1035E-07 | NA | NA | 3.85  | 0.12 |
| 1.4344E-06 | 3.2172E-05 | 9.5683E-07 | NA | NA | 4.47  | 0.13 |
| 3.9887E-06 | 2.9433E-05 | 2.003E-06  | NA | NA | 3.98  | 0.26 |
| 1.4714E-06 | 2.6464E-05 | 1.2285E-06 | NA | NA | 3.69  | 0.13 |
| 1.5514E-06 | 2.7621E-05 | 1.3627E-06 | NA | NA | 3.98  | 0.14 |
| 1.657E-06  | 2.6845E-05 | 2.142E-06  | NA | NA | 3.93  | 0.19 |
| 1.4633E-06 | 2.4394E-05 | 2.0246E-06 | NA | NA | 3.37  | 0.17 |
| 1.3201E-06 | 2.1228E-05 | 1.1383E-06 | NA | NA | 2.78  | 0.12 |
| 2.478E-06  | 2.3482E-05 | 9.9184E-07 | NA | NA | 3.24  | 0.16 |
| 1.4395E-06 | 2.089E-05  | 8.3583E-07 | NA | NA | 3.08  | 0.11 |
| 1.8667E-06 | 2.445E-05  | 1.2617E-06 | NA | NA | 3.46  | 0.15 |
| 1.2992E-06 | 2.2E-05    | 1.9909E-06 | NA | NA | 3.09  | 0.17 |
| 2.0984E-06 | 3.0148E-05 | 1.744E-06  | NA | NA | 4.48  | 0.18 |
| 1.4472E-06 | 1.7265E-05 | 1.0831E-06 | NA | NA | 2.63  | 0.12 |
| 1.5109E-06 | 1.8913E-05 | 1.4527E-06 | NA | NA | 2.62  | 0.14 |
| 1.4104E-06 | 2.0536E-05 | 1.1078E-06 | NA | NA | 3.02  | 0.12 |
| 1.3937E-06 | 2.2523E-05 | 1.8878E-06 | NA | NA | 3.00  | 0.16 |
| 1.4474E-06 | 1.7542E-05 | 1.1468E-06 | NA | NA | 2.57  | 0.12 |
| 8.9627E-07 | 1.8534E-05 | 1.0147E-06 | NA | NA | 2.74  | 0.10 |
| 1.6736E-06 | 3.1831E-05 | 1.26E-06   | NA | NA | 4.19  | 0.15 |
| 7.3095E-06 | 0.00023629 | 4.4089E-06 | NA | NA | 32.97 | 0.77 |
| 2.102E-06  | 2.0704E-05 | 9.4155E-07 | NA | NA | 2.98  | 0.14 |
| 1.7203E-06 | 2.5701E-05 | 1.4772E-06 | NA | NA | 3.61  | 0.15 |
| 1.955E-06  | 2.6157E-05 | 1.8105E-06 | NA | NA | 3.51  | 0.17 |
| 2.6061E-06 | 2.6975E-05 | 1.9315E-06 | NA | NA | 3.73  | 0.20 |
| 4.9663E-06 | 5.1052E-05 | 3.1758E-06 | NA | NA | 7.40  | 0.37 |

|            |            |            |    |    |       |      |
|------------|------------|------------|----|----|-------|------|
| 1.7859E-06 | 2.0989E-05 | 1.2176E-06 | NA | NA | 3.08  | 0.14 |
| 1.9222E-06 | 3.3864E-05 | 1.5616E-06 | NA | NA | 4.69  | 0.17 |
| 1.5541E-05 | 0.00010853 | 1.0056E-05 | NA | NA | 16.08 | 1.11 |
| 1.0315E-06 | 1.4636E-05 | 1.2682E-06 | NA | NA | 2.02  | 0.11 |
| 9.2981E-07 | 1.7685E-05 | 1.2811E-06 | NA | NA | 2.50  | 0.11 |
| 1.3413E-06 | 2.2229E-05 | 9.2454E-07 | NA | NA | 2.97  | 0.11 |
| 1.7093E-06 | 1.5516E-05 | 1.5783E-06 | NA | NA | 2.26  | 0.15 |
| 1.2786E-06 | 1.6418E-05 | 4.3454E-07 | NA | NA | 2.30  | 0.08 |
| 1.0465E-06 | 1.5976E-05 | 1.0111E-06 | NA | NA | 2.19  | 0.10 |
| 1.4508E-06 | 1.6169E-05 | 1.019E-06  | NA | NA | 2.15  | 0.11 |
| 5.4628E-07 | 1.4977E-05 | 1.2724E-06 | NA | NA | 2.30  | 0.10 |
| 1.2877E-06 | 1.5407E-05 | 1.6665E-06 | NA | NA | 2.09  | 0.14 |
| 2.0239E-06 | 1.4673E-05 | 7.2719E-07 | NA | NA | 2.09  | 0.12 |
| 6.7209E-07 | 1.4316E-05 | 1.162E-06  | NA | NA | 1.94  | 0.10 |
| 1.1927E-06 | 9.9819E-06 | 9.2086E-07 | NA | NA | 1.53  | 0.09 |
| 1.288E-06  | 9.6079E-06 | 1.2263E-06 | NA | NA | 1.50  | 0.11 |
| 6.378E-07  | 1.0843E-05 | 7.0509E-07 | NA | NA | 1.55  | 0.07 |
| 1.1227E-06 | 1.4097E-05 | 1.4268E-06 | NA | NA | 2.04  | 0.12 |
| 1.1933E-06 | 1.6859E-05 | 8.2702E-07 | NA | NA | 2.06  | 0.09 |
| 1.5509E-06 | 2.0253E-05 | 1.2252E-06 | NA | NA | 2.97  | 0.13 |
| 1.6266E-06 | 2.3375E-05 | 1.3563E-06 | NA | NA | 3.07  | 0.14 |
| 1.5035E-06 | 2.1131E-05 | 1.4694E-06 | NA | NA | 2.79  | 0.14 |
| 1.2231E-06 | 1.862E-05  | 1.6952E-06 | NA | NA | 2.57  | 0.14 |
| 1.0641E-06 | 1.9363E-05 | 1.2841E-06 | NA | NA | 2.42  | 0.11 |
| 1.3616E-06 | 1.3858E-05 | 8.744E-07  | NA | NA | 2.09  | 0.10 |
| 1.3388E-06 | 1.4538E-05 | 1.0021E-06 | NA | NA | 2.23  | 0.11 |
| 1.3076E-06 | 1.0488E-05 | 1.1636E-06 | NA | NA | 1.47  | 0.11 |
| 9.7467E-07 | 9.1196E-06 | 7.5324E-07 | NA | NA | 1.27  | 0.08 |
| 1.9207E-06 | 1.4593E-05 | 1.018E-06  | NA | NA | 2.21  | 0.13 |
| 1.2045E-06 | 1.363E-05  | 9.757E-07  | NA | NA | 1.91  | 0.10 |
| 1.352E-06  | 1.3325E-05 | 1.2868E-06 | NA | NA | 1.85  | 0.12 |
| 1.6668E-06 | 1.7023E-05 | 9.6135E-07 | NA | NA | 2.52  | 0.12 |
| 1.6515E-06 | 1.5574E-05 | 1.0339E-06 | NA | NA | 2.31  | 0.12 |
| 1.1462E-06 | 1.6093E-05 | 8.6578E-07 | NA | NA | 2.23  | 0.09 |
| 1.5619E-06 | 1.5355E-05 | 1.1884E-06 | NA | NA | 2.13  | 0.12 |
| 1.4751E-06 | 1.918E-05  | 1.537E-06  | NA | NA | 2.68  | 0.14 |
| 1.3221E-06 | 1.9176E-05 | 1.092E-06  | NA | NA | 2.66  | 0.11 |
| 2.624E-06  | 3.2301E-05 | 1.7854E-06 | NA | NA | 4.47  | 0.20 |
| 1.3102E-06 | 1.5707E-05 | 9.668E-07  | NA | NA | 2.38  | 0.11 |
| 1.1028E-06 | 1.6407E-05 | 9.5349E-07 | NA | NA | 2.34  | 0.10 |
| 1.9989E-06 | 2.9698E-05 | 2.3646E-06 | NA | NA | 4.26  | 0.21 |
| 1.2274E-06 | 2.5924E-05 | 8.3947E-07 | NA | NA | 3.51  | 0.11 |



|            |            |            |    |    |       |      |
|------------|------------|------------|----|----|-------|------|
| 1.0496E-06 | 2.3223E-05 | 1.1912E-06 | NA | NA | 3.23  | 0.12 |
| 1.1978E-06 | 2.1487E-05 | 1.5686E-06 | NA | NA | 2.91  | 0.14 |
| 5.7695E-06 | 0.00010001 | 4.4764E-06 | NA | NA | 13.78 | 0.50 |
| 5.6786E-06 | 0.00011522 | 4.9195E-06 | NA | NA | 16.08 | 0.54 |
| 2.3204E-06 | 2.462E-05  | 1.4336E-06 | NA | NA | 3.31  | 0.17 |
| 9.5483E-07 | 1.7211E-05 | 1.5219E-06 | NA | NA | 2.44  | 0.13 |
| 8.5692E-07 | 1.7629E-05 | 1.279E-06  | NA | NA | 2.46  | 0.11 |
| 7.9795E-07 | 1.6614E-05 | 7.9425E-07 | NA | NA | 2.25  | 0.08 |
| 1.4857E-06 | 1.6516E-05 | 1.6929E-06 | NA | NA | 2.25  | 0.15 |
| 1.4698E-06 | 1.8E-05    | 9.9701E-07 | NA | NA | 2.53  | 0.11 |
| 1.0519E-06 | 1.8279E-05 | 8.0304E-07 | NA | NA | 2.44  | 0.09 |
| 1.534E-06  | 2.4262E-05 | 1.8003E-06 | NA | NA | 3.30  | 0.16 |
| 2.0376E-06 | 4.3271E-05 | 1.7029E-06 | NA | NA | 5.80  | 0.19 |
| 2.9614E-06 | 3.3687E-05 | 1.7717E-06 | NA | NA | 4.82  | 0.22 |
| 1.1744E-06 | 1.9281E-05 | 1.0697E-06 | NA | NA | 2.73  | 0.11 |
| 1.2657E-06 | 2.2017E-05 | 1.1158E-06 | NA | NA | 2.94  | 0.12 |
| 1.4157E-06 | 1.8363E-05 | 8.8396E-07 | NA | NA | 2.74  | 0.11 |
| 1.1425E-06 | 1.6312E-05 | 8.9633E-07 | NA | NA | 2.49  | 0.10 |
| 1.1559E-06 | 1.5542E-05 | 1.2983E-06 | NA | NA | 2.30  | 0.12 |
| 4.2601E-06 | 2.7742E-05 | 2.6797E-06 | NA | NA | 3.69  | 0.30 |
| 8.0466E-07 | 9.7597E-06 | 5.4482E-07 | NA | NA | 1.41  | 0.06 |
| 1.1254E-06 | 1.3549E-05 | 1.1792E-06 | NA | NA | 1.70  | 0.11 |
| 1.4589E-06 | 1.1943E-05 | 7.4392E-07 | NA | NA | 1.70  | 0.10 |
| 8.7952E-07 | 1.4165E-05 | 6.4894E-07 | NA | NA | 2.11  | 0.07 |
| 1.1492E-06 | 1.3941E-05 | 1.0749E-06 | NA | NA | 2.02  | 0.10 |
| 3.8011E-06 | 2.9451E-05 | 3.9412E-06 | NA | NA | 3.96  | 0.35 |
| 1.3488E-06 | 1.6849E-05 | 1.0489E-06 | NA | NA | 2.39  | 0.11 |
| 1.4406E-06 | 1.7766E-05 | 1.5359E-06 | NA | NA | 2.57  | 0.14 |
| 1.572E-06  | 2.2669E-05 | 1.5434E-06 | NA | NA | 3.10  | 0.15 |
| 1.1933E-06 | 9.7635E-06 | 7.1575E-07 | NA | NA | 1.28  | 0.08 |
| 7.1845E-06 | 8.705E-05  | 3.1724E-06 | NA | NA | 12.07 | 0.48 |
| 9.9092E-07 | 1.8108E-05 | 1.1889E-06 | NA | NA | 2.43  | 0.11 |
| 1.3963E-06 | 1.7686E-05 | 1.1586E-06 | NA | NA | 2.40  | 0.12 |
| 1.444E-06  | 2.3671E-05 | 1.4368E-06 | NA | NA | 3.26  | 0.14 |
| 1.6265E-06 | 1.9597E-05 | 1.9655E-06 | NA | NA | 2.65  | 0.17 |
| 1.9257E-06 | 2.0577E-05 | 1.1838E-06 | NA | NA | 2.90  | 0.14 |
| 1.2716E-06 | 2.0699E-05 | 1.3366E-06 | NA | NA | 2.94  | 0.13 |
| 9.5639E-07 | 4.7392E-06 | 5.2424E-07 | NA | NA | 0.78  | 0.06 |
| 8.59E-07   | 8.2601E-06 | 1.4374E-06 | NA | NA | 1.16  | 0.11 |
| 1.4037E-06 | 1.1886E-05 | 8.601E-07  | NA | NA | 1.70  | 0.10 |
| 2.6531E-06 | 1.4622E-05 | 1.1706E-06 | NA | NA | 2.09  | 0.16 |
| 1.3773E-06 | 1.9178E-05 | 1.3056E-06 | NA | NA | 2.63  | 0.13 |

|            |            |            |    |    |       |      |
|------------|------------|------------|----|----|-------|------|
| 1.1039E-05 | 3.6896E-05 | 8.3097E-06 | NA | NA | 5.29  | 0.82 |
| 6.3978E-07 | 5.6867E-06 | 7.2654E-07 | NA | NA | 0.78  | 0.06 |
| 7.7529E-07 | 7.098E-06  | 8.1315E-07 | NA | NA | 1.03  | 0.07 |
| 6.8608E-07 | 4.6675E-06 | 4.4809E-07 | NA | NA | 0.74  | 0.05 |
| 7.1942E-07 | 4.5372E-06 | 5.3336E-07 | NA | NA | 0.67  | 0.05 |
| 8.6491E-07 | 3.6703E-06 | 5.5617E-07 | NA | NA | 0.49  | 0.06 |
| 1.1509E-06 | 1.6296E-05 | 1.4011E-06 | NA | NA | 2.29  | 0.12 |
| 3.9061E-05 | 0.00013811 | 2.7938E-05 | NA | NA | 19.48 | 2.84 |
| 1.4127E-06 | 2.048E-05  | 1.1744E-06 | NA | NA | 3.06  | 0.12 |
| 9.589E-06  | 4.9356E-05 | 7.0263E-06 | NA | NA | 6.94  | 0.71 |
| 7.2373E-07 | 1.857E-05  | 9.7573E-07 | NA | NA | 2.44  | 0.09 |
| 1.5051E-06 | 1.9996E-05 | 9.3229E-07 | NA | NA | 2.82  | 0.11 |
| 1.7356E-06 | 2.2462E-05 | 9.3252E-07 | NA | NA | 3.00  | 0.12 |
| 7.1829E-07 | 1.4025E-05 | 1.1823E-06 | NA | NA | 1.86  | 0.10 |
| 1.018E-06  | 1.8861E-05 | 1.6022E-06 | NA | NA | 2.58  | 0.13 |
| 1.2049E-06 | 1.5216E-05 | 1.1226E-06 | NA | NA | 2.10  | 0.11 |
| 9.541E-07  | 1.2382E-05 | 9.0615E-07 | NA | NA | 1.65  | 0.09 |
| 8.1624E-06 | 4.0485E-05 | 4.7867E-06 | NA | NA | 5.94  | 0.55 |
| 9.2176E-06 | 3.7145E-05 | 6.7053E-06 | NA | NA | 5.46  | 0.68 |
| 2.6611E-05 | 7.9961E-05 | 1.9656E-05 | NA | NA | 11.67 | 1.97 |
| 2.0095E-06 | 2.1037E-05 | 1.9747E-06 | NA | NA | 2.90  | 0.18 |
| 1.2098E-06 | 1.2899E-05 | 1.1088E-06 | NA | NA | 1.99  | 0.11 |
| 7.7115E-07 | 1.5442E-05 | 1.3134E-06 | NA | NA | 2.07  | 0.11 |
| 1.2567E-06 | 1.635E-05  | 1.2648E-06 | NA | NA | 2.40  | 0.12 |
| 1.2586E-06 | 1.1003E-05 | 9.5728E-07 | NA | NA | 1.43  | 0.10 |
| 7.6104E-07 | 1.4957E-05 | 1.13E-06   | NA | NA | 2.10  | 0.10 |
| 1.6694E-06 | 2.1353E-05 | 8.7587E-07 | NA | NA | 3.07  | 0.12 |
| 1.1446E-06 | 1.5297E-05 | 1.0786E-06 | NA | NA | 2.01  | 0.10 |
| 8.8308E-07 | 2.5737E-05 | 9.6303E-07 | NA | NA | 3.23  | 0.10 |
| 8.6345E-07 | 1.4924E-05 | 8.2554E-07 | NA | NA | 2.23  | 0.08 |
| 5.6234E-06 | 2.3569E-05 | 3.3955E-06 | NA | NA | 3.32  | 0.38 |
| 1.4217E-06 | 2.1171E-05 | 7.1119E-07 | NA | NA | 2.93  | 0.10 |
| 1.2598E-06 | 2.0818E-05 | 1.0521E-06 | NA | NA | 2.85  | 0.11 |
| 1.2537E-06 | 2.2653E-05 | 8.6737E-07 | NA | NA | 3.09  | 0.10 |
| 1.4613E-06 | 2.272E-05  | 1.0393E-06 | NA | NA | 3.14  | 0.12 |
| 1.8241E-06 | 2.0005E-05 | 6.1469E-07 | NA | NA | 2.87  | 0.12 |
| 1.4293E-06 | 2.0292E-05 | 1.0435E-06 | NA | NA | 2.98  | 0.12 |
| 1.9799E-06 | 2.0081E-05 | 1.1557E-06 | NA | NA | 2.97  | 0.14 |
| 1.3882E-06 | 2.1002E-05 | 1.3071E-06 | NA | NA | 2.86  | 0.13 |
| 1.4043E-06 | 1.9682E-05 | 1.0813E-06 | NA | NA | 2.77  | 0.12 |
| 1.0785E-06 | 2.0532E-05 | 1.8396E-06 | NA | NA | 2.81  | 0.15 |
| 1.2227E-06 | 2.1274E-05 | 1.6748E-06 | NA | NA | 3.02  | 0.14 |

|            |            |            |    |    |      |      |
|------------|------------|------------|----|----|------|------|
| 5.7437E-07 | 2.187E-05  | 1.6078E-06 | NA | NA | 2.95 | 0.13 |
| 1.0171E-06 | 2.2515E-05 | 1.6427E-06 | NA | NA | 3.04 | 0.14 |
| 1.4385E-06 | 2.165E-05  | 1.4178E-06 | NA | NA | 3.01 | 0.14 |
| 1.9244E-06 | 2.2726E-05 | 9.4676E-07 | NA | NA | 3.14 | 0.13 |
| 1.3491E-06 | 1.8271E-05 | 1.5459E-06 | NA | NA | 2.55 | 0.14 |
| 1.8333E-06 | 2.1269E-05 | 1.4095E-06 | NA | NA | 2.81 | 0.15 |
| 9.8029E-07 | 2.0151E-05 | 2.1233E-06 | NA | NA | 2.71 | 0.17 |
| 1.8403E-06 | 1.7329E-05 | 1.0297E-06 | NA | NA | 2.39 | 0.13 |
| 1.2317E-06 | 1.795E-05  | 1.1553E-06 | NA | NA | 2.51 | 0.11 |
| 1.3986E-06 | 1.9834E-05 | 1.2856E-06 | NA | NA | 2.65 | 0.13 |
| 2.0603E-06 | 1.8749E-05 | 1.0971E-06 | NA | NA | 2.64 | 0.14 |
| 4.963E-07  | 3.6287E-06 | 4.1567E-07 | NA | NA | 0.54 | 0.04 |
| 5.7928E-07 | 4.6434E-06 | 7.9045E-07 | NA | NA | 0.60 | 0.06 |
| 3.2803E-06 | 3.6108E-05 | 4.5057E-06 | NA | NA | 5.12 | 0.37 |
| 1.2878E-06 | 1.2585E-05 | 1.1245E-06 | NA | NA | 1.83 | 0.11 |
| 2.0789E-06 | 2.8486E-05 | 1.501E-06  | NA | NA | 4.03 | 0.17 |
| 1.9663E-06 | 2.1276E-05 | 1.1568E-06 | NA | NA | 3.10 | 0.14 |
| 8.105E-06  | 2.5344E-05 | 5.8704E-06 | NA | NA | 3.71 | 0.59 |
| 1.0014E-06 | 8.9734E-06 | 7.2801E-07 | NA | NA | 1.30 | 0.08 |
| 5.0365E-07 | 1.08E-05   | 9.825E-07  | NA | NA | 1.50 | 0.08 |
| 6.9924E-07 | 1.2168E-05 | 4.6163E-07 | NA | NA | 1.63 | 0.06 |
| 5.872E-07  | 4.8158E-06 | 5.4194E-07 | NA | NA | 0.68 | 0.05 |
| 1.501E-06  | 2.4654E-05 | 9.6853E-07 | NA | NA | 3.40 | 0.12 |
| 1.4743E-06 | 2.1806E-05 | 1.1786E-06 | NA | NA | 3.07 | 0.13 |
| 1.2988E-06 | 2.3907E-05 | 1.4127E-06 | NA | NA | 3.17 | 0.13 |
| 1.5439E-06 | 2.1028E-05 | 1.8084E-06 | NA | NA | 3.10 | 0.16 |
| 1.3535E-06 | 1.9128E-05 | 1.6547E-06 | NA | NA | 2.64 | 0.14 |
| 1.7189E-06 | 2.0959E-05 | 9.285E-07  | NA | NA | 2.98 | 0.12 |
| 1.5455E-06 | 2.1752E-05 | 7.5127E-07 | NA | NA | 2.94 | 0.11 |
| 1.4865E-06 | 2.2094E-05 | 1.0519E-06 | NA | NA | 3.19 | 0.12 |
| 1.8404E-06 | 1.9779E-05 | 1.8018E-06 | NA | NA | 2.88 | 0.17 |
| 8.5438E-07 | 2.0581E-05 | 1.3497E-06 | NA | NA | 2.77 | 0.12 |
| 1.4597E-06 | 2.0008E-05 | 2.1224E-06 | NA | NA | 2.75 | 0.18 |
| 1.7155E-06 | 2.0409E-05 | 1.9555E-06 | NA | NA | 2.85 | 0.17 |
| 1.4052E-06 | 1.8531E-05 | 9.2624E-07 | NA | NA | 2.63 | 0.11 |
| 2.0656E-06 | 1.9008E-05 | 1.213E-06  | NA | NA | 2.69 | 0.14 |
| 1.5235E-06 | 2.2859E-05 | 9.1004E-07 | NA | NA | 2.91 | 0.11 |
| 1.0746E-06 | 1.7315E-05 | 1.326E-06  | NA | NA | 2.37 | 0.12 |
| 1.6079E-06 | 1.995E-05  | 2.0284E-06 | NA | NA | 2.75 | 0.17 |
| 8.1234E-07 | 1.6861E-05 | 1.4144E-06 | NA | NA | 2.62 | 0.12 |
| 1.7736E-06 | 2.0241E-05 | 1.8167E-06 | NA | NA | 2.89 | 0.17 |
| 1.6304E-06 | 2.3734E-05 | 1.3856E-06 | NA | NA | 3.15 | 0.14 |

|            |            |            |    |    |      |      |
|------------|------------|------------|----|----|------|------|
| 1.3606E-06 | 1.8242E-05 | 1.3285E-06 | NA | NA | 2.52 | 0.13 |
| 1.7961E-06 | 1.5865E-05 | 1.0091E-06 | NA | NA | 2.17 | 0.12 |
| 1.2736E-06 | 1.8538E-05 | 1.603E-06  | NA | NA | 2.61 | 0.14 |
| 2.7646E-06 | 2.6272E-05 | 2.0198E-06 | NA | NA | 3.46 | 0.21 |
| 1.887E-06  | 1.4679E-05 | 7.5974E-07 | NA | NA | 2.06 | 0.12 |
| 1.7849E-06 | 1.7973E-05 | 9.9068E-07 | NA | NA | 2.28 | 0.12 |
| 1.2272E-06 | 1.7783E-05 | 1.6195E-06 | NA | NA | 2.61 | 0.14 |
