# Supplementary material for: Constraints on Alpine Fault (New Zealand) mylonitization temperatures and the geothermal gradient from Ti-in-quartz thermobarometry
Source: Copernicus journal article supplement (doi:10.5194/se-9-1123-2018), 2018-09-25
Supplement: Supplementary file 2 [file se-9-1123-2018-supplement.zip]

**Supplement Table 1.** Analyses of NIST glasses and low-Ti Herkimer "Diamond" blank

|          | $^{47}\text{Ti}/^{30}\text{Si}$ | $\sigma_{\text{mean}}$ | $^{49}\text{Ti}/^{30}\text{Si}$ | $\sigma_{\text{mean}}$ | Ti (ppm) | $1\sigma$ |
|----------|---------------------------------|------------------------|---------------------------------|------------------------|----------|-----------|
| NIST 610 | 9.05E-03                        | 5.40E-05               | 6.72E-03                        | 3.40E-05               | 434      | 15        |
|          | 9.11E-03                        | 3.70E-05               | 6.73E-03                        | 3.90E-05               | 434      | 15        |
|          | 9.18E-03                        | 3.20E-05               | 6.77E-03                        | 3.00E-05               | 434      | 15        |
|          | 9.18E-03                        | 8.40E-05               | 6.56E-03                        | 8.25E-05               | 434      | 15        |
| NIST 612 | 7.25E-04                        | 7.00E-06               | 5.30E-04                        | 8.00E-06               | 44       | 5         |
|          | 7.50E-04                        | 1.00E-05               | 5.45E-04                        | 7.00E-06               | 44       | 5         |
|          | 7.49E-04                        | 1.12E-05               | 5.57E-04                        | 1.05E-05               | 44       | 5         |
|          | 7.45E-04                        | 1.38E-05               | 5.45E-04                        | 1.08E-05               | 44       | 5         |
|          | 7.69E-04                        | 2.24E-05               | 5.69E-04                        | 1.19E-05               | 44       | 5         |
|          | 7.68E-04                        | 2.10E-05               | 5.66E-04                        | 1.61E-05               | 44       | 5         |
|          | 7.71E-04                        | 1.59E-05               | 5.73E-04                        | 1.24E-05               | 44       | 5         |
|          | 7.77E-04                        | 1.37E-05               | 5.52E-04                        | 1.46E-05               | 44       | 5         |
| Herkimer | 1.60E-07                        | 0.00E+00               | 8.00E-08                        | 0.00E+00               | 0.0045   | 2.00E-03  |
|          | 4.72E-07                        | 2.53E-07               | 5.61E-07                        | 2.84E-07               | 0.0045   | 2.00E-03  |
|          | 1.53E-06                        | 8.67E-07               | 1.54E-06                        | 6.83E-07               | 0.0045   | 2.00E-03  |
|          | 1.23E-06                        | 3.80E-07               | 1.09E-06                        | 3.96E-07               | 0.0045   | 2.00E-03  |
|          | 2.52E-07                        | 1.68E-07               | 2.52E-07                        | 1.68E-07               | 0.0045   | 2.00E-03  |
|          | 2.51E-07                        | 2.51E-07               | 2.52E-07                        | 1.68E-07               | 0.0045   | 2.00E-03  |

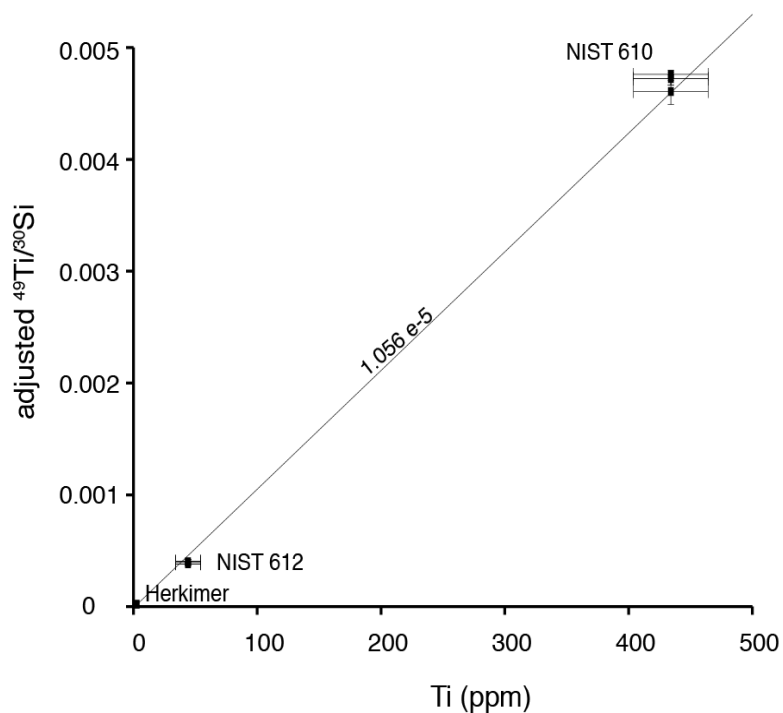

Figure. Ti content of standards vs. adjusted  $^{49}\text{Ti}/^{30}\text{Si}$  ratios. Measured  $^{49}\text{Ti}/^{30}\text{Si}$  ratios for NIST glasses are corrected for Si concentration (multiplied by factors of 0.7 and 0.72 for NIST 610 and 612 respectively to account for differences in silica content between quartz and NIST glass) then divided by a correction factor of 0.67 (Behr et al., 2010) to enable direct comparison with quartz standards. The plotted regression line is constrained by the origin and data for NIST glasses only. Error bars for  $^{49}\text{Ti}/^{30}\text{Si}$  ratios and Ti concentrations are 2 standard deviations.
