# Supplementary material for: Constraints on Alpine Fault (New Zealand) mylonitization temperatures and the geothermal gradient from Ti-in-quartz thermobarometry
Source: Copernicus journal article supplement (doi:10.5194/se-9-1123-2018), 2018-09-25
Supplement: Supplementary file 3 [file se-9-1123-2018-supplement.zip]

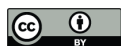

## *Supplement of*

# **Constraints on Alpine Fault (New Zealand) mylonitization temperatures and the geothermal gradient from Ti-in-quartz thermobarometry**

**Steven B. Kidder et al.**

*Correspondence to:* Steven B. Kidder ([skidder@ccny.cuny.edu](mailto:skidder@ccny.cuny.edu))

- [se-9-1123-2018-supplement-title-page.pdf](#)
- [Supplement Table 1 - Standards.pdf](#)
- [Supplement Table 2.pdf](#)
- [Supplement Table 3.pdf](#)
- [Table 2 and 3 data.txt](#)

The copyright of individual parts of the supplement might differ from the CC BY 4.0 License.
