# Supplementary material for: Constraints on Alpine Fault (New Zealand) mylonitization temperatures and the geothermal gradient from Ti-in-quartz thermobarometry
Source: Copernicus journal article supplement (doi:10.5194/se-9-1123-2018), 2018-09-25
Supplement: Supplementary file 4 [file se-9-1123-2018-supplement.zip]

## Supplemental Table 2. Microstructural observations for each analysis point

Note that the data provided in tables 2 and 3 below is also duplicated as a .txt file

Values in the columns have the following table meanings based on petrographic analysis:

ID. Individual analysis identifier

sample. Rock sample ("OU") samples are catalogued in the Otago University collection.

comp. composition of analyzed area

loc. 1 = Gaunt, 3 = Stony

rt. Rutile observed in the rock? (0=no, 1 = yes).

chl. Chlorite observed in the rock? (0=no, 1 = yes).

D2AF. Structural distance to Alpine Fault (measured perpendicular to foliation)

bnd. analysis does not touch a grain boundary (0); if an analysis is on a boundary (<5 um from center, or is too close to call), then: (1) if the grains touching the boundary are generally similar in size (within a factor of ~3-4 of one another) or (2) If the grains are very different in size.

dst. distance, in microns, from the center of the analysis to the nearest grain boundary. Values of 1 micron or less are entered as 1.

gsl. length (in microns) of the long axis of the analyzed grain

gss. length (in microns) of the short axis of the analyzed grain

und. 0-3 scale of undulose extinction. 0=none,1=mild/moderate, 2=heavy, 3=severe

sub. subgrain character of analyzed spot: 0 = no subgrains, 1 = subgrains barely visible to moderate, 2 = heavy, 3 = maybe actually real grains.

sgl. length (in microns), of the long axis of the subgrain (if the analysis lies within a subgrain)

sgs. length (in microns), of the short axis of the subgrain (if the analysis lies within a subgrain)

sgd. if the measurement lies within a subgrain, the distance (in microns) from the center of the analysis to the nearest subgrain or grain boundary. Will either be the same as "distance" if the closest thing to a grain boundary, or, if a subgrain boundary is closer, it'll be a number less than what is in the "distance" column. If <5, the analysis is on a subgrain boundary. If there is a significant difference between the subgrains on both side of the boundaries (greater than a factor of 3 or 4), then the columns sgsLong and sgsShort distance should be left blank.

crk. if the analysis is on a visible crack (1), if not (0)

Hole. If the analysis includes a small hole, e.g. due to imperfect polish (1), if not (0)

cls. large grain compared to surroundings (NA), otherwise measured grain is in contact with only quartz that is significantly different in size: "1" if contact with one or 2 other similar size grains, but still isolated; "2" if in the majority surrounded by other small grains, but also contacts one or more large grains; "3" if grain is completely surrounded by similar sized grains

nq. "1" if the analysis maybe hit some mineral phase besides quartz, enter "2" if it did for sure

fi. "1" if the analysis probably intercepted an array of fluid inclusions, "2" if it did for sure

d2n. Distance from the center of the analysis to nearest edge of a dark mineral (in microns). Tiny dark specks of uncertain origin are not

Gs. calculated total grain size (diameter of a circle with the same area as the ellipse indicated by the measurements)

| ID                   | sample   | comp | loc | rt | chl | D2AF | bnd | dst | gsl | gss | und | sub | sgl | sgs | sgd | crk | hole | cls | nq | fi | d2nq | gs  |
|----------------------|----------|------|-----|----|-----|------|-----|-----|-----|-----|-----|-----|-----|-----|-----|-----|------|-----|----|----|------|-----|
| 77925and52111@1.asc  | 5.2.1.11 | qfs  | 1   | 0  | 1   | 541  | 0   | 10  | 475 | 150 | 1   | 0   | NA  | NA  | NA  | 0   | 0    | NA  | 0  | 0  | 10   | 267 |
| 77925and52111@2.asc  | 5.2.1.11 | qfs  | 1   | 0  | 1   | 541  | 0   | 30  | 475 | 150 | 1   | 0   | NA  | NA  | NA  | 0   | 0    | NA  | 0  | 0  | 30   | 267 |
| 77925and52111@3.asc  | 5.2.1.11 | qfs  | 1   | 0  | 1   | 541  | 0   | 50  | 475 | 150 | 1   | 0   | NA  | NA  | NA  | 0   | 0    | NA  | 0  | 0  | 50   | 267 |
| 77925and52111@4.asc  | 5.2.1.11 | qfs  | 1   | 0  | 1   | 541  | 0   | 32  | 475 | 150 | 1   | 0   | NA  | NA  | NA  | 0   | 0    | NA  | 0  | 0  | 32   | 267 |
| 77925and52111@5.asc  | 5.2.1.11 | qfs  | 1   | 0  | 1   | 541  | 0   | 18  | 475 | 150 | 1   | 0   | NA  | NA  | NA  | 0   | 0    | NA  | 0  | 0  | 18   | 267 |
| 77925and52111@7.asc  | 5.2.1.11 | qfs  | 1   | 0  | 1   | 541  | 0   | 20  | 225 | 150 | 0   | 2   | 120 | 22  | 0   | 0   | 0    | NA  | 0  | 0  | 22   | 184 |
| 77925and52111@8.asc  | 5.2.1.11 | qfs  | 1   | 0  | 1   | 541  | 0   | 50  | 225 | 151 | 0   | 2   | 150 | 30  | 14  | 0   | 0    | NA  | 0  | 0  | 50   | 184 |
| 77925and52111@9.asc  | 5.2.1.11 | qfs  | 1   | 0  | 1   | 541  | 0   | 64  | 225 | 152 | 0   | 2   | 180 | 55  | 0   | 0   | 0    | NA  | 0  | 0  | 70   | 185 |
| 77925and52111@10.asc | 5.2.1.11 | qfs  | 1   | 0  | 1   | 541  | 0   | 46  | 225 | 153 | 0   | 2   | 200 | 75  | 20  | 1   | 0    | NA  | 0  | 0  | 74   | 186 |
| 77925and52111@11.asc | 5.2.1.11 | qfs  | 1   | 0  | 1   | 541  | 0   | 40  | 250 | 75  | 1   | 0   | NA  | NA  | NA  | 0   | 0    | 1   | 0  | 0  | 40   | 137 |
| 77925and52111@12.asc | 5.2.1.11 | qfs  | 1   | 0  | 1   | 541  | 0   | 14  | 235 | 125 | 1   | 0   | NA  | NA  | NA  | 0   | 0    | 2   | 0  | 0  | 14   | 171 |
| 77925and52111@13.asc | 5.2.1.11 | qfs  | 1   | 0  | 1   | 541  | 1   | 2   | 60  | 30  | 0   | 0   | NA  | NA  | NA  | 0   | 0    | 3   | 0  | 0  | 24   | 42  |
| 77925and52111@14.asc | 5.2.1.11 | qfs  | 1   | 0  | 1   | 541  | 0   | 16  | 40  | 30  | 0   | 0   | NA  | NA  | NA  | 0   | 0    | 3   | 0  | 0  | 18   | 35  |
| 77925and52111@15.asc | 5.2.1.11 | qfs  | 1   | 0  | 1   | 541  | 0   | 12  | 50  | 50  | 0   | 0   | NA  | NA  | NA  | 0   | 0    | 3   | 0  | 0  | 18   | 50  |
| 77925and52111@16.asc | 5.2.1.11 | qfs  | 1   | 0  | 1   | 541  | 1   | 1   | 48  | 30  | 0   | 0   | NA  | NA  | NA  | 0   | 0    | 3   | 0  | 0  | 14   | 38  |
| 77925and52111@18.asc | 5.2.1.11 | qfs  | 1   | 0  | 1   | 541  | 1   | 2   | 30  | 20  | 0   | 0   | NA  | NA  | NA  | 0   | 0    | 2   | 0  | 0  | 10   | 24  |
| 77925and52111@19.asc | 5.2.1.11 | qfs  | 1   | 0  | 1   | 541  | 1   | 2   | 30  | 18  | 0   | 0   | NA  | NA  | NA  | 0   | 0    | 2   | 0  | 0  | 12   | 23  |
| 77925and52111@20.asc | 5.2.1.11 | qfs  | 1   | 0  | 1   | 541  | 0   | 14  | 30  | 30  | 0   | 0   | NA  | NA  | NA  | 0   | 0    | 2   | 0  | 0  | 16   | 30  |
| 77925and52111@21.asc | 5.2.1.11 | qfs  | 1   | 0  | 1   | 541  | 0   | 6   | 36  | 20  | 0   | 0   | NA  | NA  | NA  | 0   | 0    | 3   | 0  | 0  | 20   | 27  |
| 77925and52111@22.asc | 5.2.1.11 | qfs  | 1   | 0  | 1   | 541  | 0   | 36  | 250 | 50  | 0   | 2   | 76  | 28  | 0   | 0   | 0    | 1   | 0  | 0  | 32   | 112 |
| 77925and52111@23.asc | 5.2.1.11 | qfs  | 1   | 0  | 1   | 541  | 1   | 1   | 40  | 30  | 0   | 0   | NA  | NA  | NA  | 0   | 0    | 2   | 0  | 0  | 18   | 35  |
| 77925and52111@24.asc | 5.2.1.11 | qfs  | 1   | 0  | 1   | 541  | 0   | 20  | 50  | 42  | 0   | 0   | NA  | NA  | NA  | 0   | 0    | 2   | 0  | 0  | 26   | 46  |
| 77925and52111@25.asc | 5.2.1.11 | qfs  | 1   | 0  | 1   | 541  | 1   | 1   | 16  | 10  | 0   | 0   | NA  | NA  | NA  | 0   | 0    | 3   | 0  | 0  | 52   | 13  |
| 77925and52111@26.asc | 5.2.1.11 | qfs  | 1   | 0  | 1   | 541  | 1   | 2   | 45  | 32  | 0   | 0   | NA  | NA  | NA  | 0   | 0    | 3   | 0  | 0  | 16   | 38  |
| 77925and52111@27.asc | 5.2.1.11 | qfs  | 1   | 0  | 1   | 541  | 1   | 2   | 40  | 20  | 0   | 0   | NA  | NA  | NA  | 0   | 0    | 3   | 0  | 0  | 14   | 28  |

|                      |           |       |   |   |   |     |   |     |     |     |   |   |     |     |    |   |   |    |   |   |     |     |
|----------------------|-----------|-------|---|---|---|-----|---|-----|-----|-----|---|---|-----|-----|----|---|---|----|---|---|-----|-----|
| 77925and52111@28.asc | 5.2.1.11  | qfs   | 1 | 0 | 1 | 541 | 0 | 6   | 28  | 20  | 0 | 0 | NA  | NA  | NA | 0 | 0 | 3  | 0 | 0 | 34  | 24  |
| 77925and52111@29.asc | 5.2.1.11  | qfs   | 1 | 0 | 1 | 541 | 0 | 10  | 68  | 30  | 0 | 0 | NA  | NA  | NA | 0 | 0 | 3  | 0 | 0 | 40  | 45  |
| 77925and52111@30.asc | 5.2.1.11  | qfs   | 1 | 0 | 1 | 541 | 1 | 4   | 110 | 40  | 0 | 0 | NA  | NA  | NA | 0 | 0 | 3  | 0 | 0 | 30  | 66  |
| 77925and52111@31.asc | 5.2.1.11  | qfs   | 1 | 0 | 1 | 541 | 0 | 12  | 80  | 40  | 0 | 0 | NA  | NA  | NA | 0 | 0 | 3  | 0 | 0 | 16  | 57  |
| 77925and52111@32.asc | 5.2.1.11  | qfs   | 1 | 0 | 1 | 541 | 1 | 1   | 34  | 15  | 0 | 0 | NA  | NA  | NA | 0 | 0 | 3  | 0 | 0 | 28  | 23  |
| 77925and52111@33.asc | 5.2.1.11  | qfs   | 1 | 0 | 1 | 541 | 1 | 1   | 70  | 35  | 0 | 0 | NA  | NA  | NA | 0 | 0 | 3  | 0 | 0 | 10  | 49  |
| 77875and52113@38.asc | 5.2.1.13  | qfs   | 1 | 0 | 0 | 461 | 1 | 4   | 30  | 12  | 0 | 0 | NA  | NA  | NA | 0 | 0 | 3  | 0 | 0 | 22  | 19  |
| 77875and52113@39.asc | 5.2.1.13  | qfs   | 1 | 0 | 0 | 461 | 0 | 5   | 80  | 40  | 0 | 0 | NA  | NA  | NA | 0 | 0 | 3  | 0 | 0 | 60  | 57  |
| 77875and52113@40.asc | 5.2.1.13  | qfs   | 1 | 0 | 0 | 461 | 1 | 1   | 30  | 20  | 0 | 0 | NA  | NA  | NA | 0 | 0 | 1  | 0 | 0 | 44  | 24  |
| 77875and52113@41.asc | 5.2.1.13  | qfs   | 1 | 0 | 0 | 461 | 0 | 16  | 100 | 30  | 0 | 1 | 70  | 26  | 4  | 0 | 0 | 2  | 0 | 0 | 16  | 55  |
| 77875and52113@42.asc | 5.2.1.13  | qfs   | 1 | 0 | 0 | 461 | 1 | 1   | 24  | 24  | 0 | 0 | NA  | NA  | NA | 0 | 0 | 3  | 0 | 0 | 24  | 24  |
| 77875and52113@43.asc | 5.2.1.13  | qfs   | 1 | 0 | 0 | 461 | 0 | 8   | 105 | 30  | 0 | 0 | NA  | NA  | NA | 0 | 0 | 2  | 0 | 0 | 50  | 56  |
| 77875and52113@44.asc | 5.2.1.13  | qfs   | 1 | 0 | 0 | 461 | 1 | 1   | 75  | 20  | 0 | 0 | NA  | NA  | NA | 0 | 0 | 3  | 0 | 0 | 24  | 39  |
| 77875and52113@45.asc | 5.2.1.13  | qfs   | 1 | 0 | 0 | 461 | 0 | 6   | 128 | 40  | 0 | 0 | NA  | NA  | NA | 0 | 0 | NA | 0 | 0 | 54  | 72  |
| 77875and52113@46.asc | 5.2.1.13  | qfs   | 1 | 0 | 0 | 461 | 0 | 8   | 62  | 38  | 0 | 0 | NA  | NA  | NA | 0 | 0 | 3  | 0 | 0 | 24  | 49  |
| 77875and52113@47.asc | 5.2.1.13  | qfs   | 1 | 0 | 0 | 461 | 0 | 6   | 50  | 20  | 0 | 0 | NA  | NA  | NA | 0 | 0 | 3  | 0 | 0 | 8   | 32  |
| 77875and52113@48.asc | 5.2.1.13  | qfs   | 1 | 0 | 0 | 461 | 1 | 4   | 40  | 20  | 0 | 0 | NA  | NA  | NA | 0 | 0 | 3  | 0 | 0 | 10  | 28  |
| 77875and52113@49.asc | 5.2.1.13  | qfs   | 1 | 0 | 0 | 461 | 0 | 6   | 325 | 80  | 0 | 1 | 315 | 75  | 6  | 0 | 0 | NA | 0 | 0 | 46  | 161 |
| 77875and52113@50.asc | 5.2.1.13  | qfs   | 1 | 0 | 0 | 461 | 0 | 10  | 175 | 90  | 0 | 0 | NA  | NA  | NA | 0 | 0 | 1  | 0 | 0 | 20  | 125 |
| 77875and52113@52.asc | 5.2.1.13  | qfs   | 1 | 0 | 0 | 461 | 0 | 18  | 450 | 90  | 0 | 0 | NA  | NA  | NA | 0 | 0 | 1  | 0 | 0 | 100 | 201 |
| 77875and52113@53.asc | 5.2.1.13  | qfs   | 1 | 0 | 0 | 461 | 0 | 20  | 850 | 200 | 2 | 3 | 360 | 120 | 20 | 0 | 0 | NA | 0 | 0 | 20  | 412 |
| 77875and52113@54.asc | 5.2.1.13  | qfs   | 1 | 0 | 0 | 461 | 0 | 8   | 850 | 200 | 2 | 3 | 174 | 70  | 8  | 0 | 0 | NA | 0 | 0 | 80  | 412 |
| 77875and52113@55.asc | 5.2.1.13  | qfs   | 1 | 0 | 0 | 461 | 1 | 2   | 30  | 20  | 0 | 0 | NA  | NA  | NA | 0 | 0 | 3  | 0 | 0 | 150 | 24  |
| 77875and52113@56.asc | 5.2.1.13  | qfs   | 1 | 0 | 0 | 461 | 0 | 8   | 100 | 34  | 0 | 1 | 50  | 34  | 0  | 0 | 0 | 3  | 0 | 0 | 148 | 58  |
| 77875and52113@57.asc | 5.2.1.13  | qfs   | 1 | 0 | 0 | 461 | 0 | 16  | 90  | 60  | 0 | 1 | 70  | 45  | 6  | 0 | 0 | 3  | 0 | 0 | 60  | 73  |
| 77875and52113@58.asc | 5.2.1.13  | qfs   | 1 | 0 | 0 | 461 | 0 | 30  | 150 | 80  | 0 | 0 | NA  | NA  | NA | 1 | 0 | 3  | 0 | 0 | 40  | 110 |
| 77875and52113@59.asc | 5.2.1.13  | qfs   | 1 | 0 | 0 | 461 | 0 | 20  | 160 | 70  | 0 | 2 | 90  | 50  | 0  | 0 | 0 | 2  | 0 | 0 | 76  | 106 |
| 77875and52113@60.asc | 5.2.1.13  | qfs   | 1 | 0 | 0 | 461 | 0 | 25  | 820 | 150 | 0 | 0 | NA  | NA  | NA | 0 | 0 | NA | 0 | 0 | 55  | 351 |
| 77875and52113@61.asc | 5.2.1.13  | qfs   | 1 | 0 | 0 | 461 | 1 | 4   | 125 | 30  | 0 | 0 | NA  | NA  | NA | 0 | 0 | 2  | 0 | 0 | 150 | 61  |
| 77875and52113@62.asc | 5.2.1.13  | qfs   | 1 | 0 | 0 | 461 | 0 | 20  | 850 | 200 | 1 | 3 | 400 | 100 | 20 | 0 | 0 | NA | 0 | 0 | 55  | 412 |
| 77875and52113@63.asc | 5.2.1.13  | qfs   | 1 | 0 | 0 | 461 | 0 | 20  | 190 | 95  | 0 | 0 | NA  | NA  | NA | 0 | 0 | 1  | 0 | 0 | 20  | 134 |
| 77982and52618@13.asc | 5.26.1.18 | mafic | 1 | 0 | 0 | 461 | 0 | 60  | 670 | 205 | 1 | 2 | 50  | 50  | 6  | 0 | 0 | 0  | 0 | 0 | 150 | 371 |
| 77982and52618@14.asc | 5.26.1.18 | mafic | 1 | 0 | 0 | 461 | 0 | 50  | 670 | 205 | 1 | 2 | 60  | 55  | 0  | 0 | 0 | 0  | 0 | 1 | 125 | 371 |
| 77982and52618@15.asc | 5.26.1.18 | mafic | 1 | 0 | 0 | 461 | 1 | 1   | 120 | 60  | 0 | 0 | NA  | NA  | NA | 0 | 0 | 0  | 0 | 0 | 210 | 85  |
| 77982and52618@16.asc | 5.26.1.18 | mafic | 1 | 0 | 0 | 461 | 1 | 1   | 32  | 28  | 0 | 0 | NA  | NA  | NA | 0 | 0 | 1  | 0 | 1 | 50  | 30  |
| 77982and52618@17.asc | 5.26.1.18 | mafic | 1 | 0 | 0 | 461 | 0 | 5   | 135 | 15  | 0 | 0 | NA  | NA  | NA | 0 | 0 | 3  | 0 | 0 | 82  | 45  |
| 77982and52618@18.asc | 5.26.1.18 | mafic | 1 | 0 | 0 | 461 | 1 | 4   | 30  | 10  | 0 | 0 | NA  | NA  | NA | 0 | 0 | 0  | 0 | 0 | 38  | 17  |
| 77982and52618@20.asc | 5.26.1.18 | mafic | 1 | 0 | 0 | 461 | 0 | 8   | 52  | 28  | 0 | 0 | NA  | NA  | NA | 0 | 0 | 3  | 0 | 0 | 56  | 38  |
| 77982and52618@21.asc | 5.26.1.18 | mafic | 1 | 0 | 0 | 461 | 0 | 10  | 40  | 20  | 1 | 0 | NA  | NA  | NA | 0 | 0 | 1  | 0 | 0 | 28  | 28  |
| 77982and52618@22.asc | 5.26.1.18 | mafic | 1 | 0 | 0 | 461 | 0 | 20  | 670 | 205 | 2 | 1 | NA  | NA  | 0  | 0 | 0 | 1  | 0 | 0 | 20  | 371 |
| 77982and52618@24.asc | 5.26.1.18 | mafic | 1 | 0 | 0 | 461 | 0 | 7   | 90  | 54  | 0 | 0 | NA  | NA  | NA | 0 | 0 | 3  | 0 | 0 | 75  | 70  |
| 77982and52618@25.asc | 5.26.1.18 | mafic | 1 | 0 | 0 | 461 | 0 | 10  | 210 | 35  | 0 | 0 | NA  | NA  | NA | 0 | 0 | 2  | 0 | 0 | 50  | 86  |
| 77982and52618@26.asc | 5.26.1.18 | mafic | 1 | 0 | 0 | 461 | 0 | 20  | 400 | 95  | 0 | 0 | NA  | NA  | NA | 0 | 0 | 2  | 0 | 0 | 100 | 195 |
| 77982and52618@27.asc | 5.26.1.18 | mafic | 1 | 0 | 0 | 461 | 1 | 4   | 150 | 75  | 0 | 0 | NA  | NA  | NA | 0 | 1 | 3  | 0 | 0 | 150 | 106 |
| 77982and52618@28.asc | 5.26.1.18 | mafic | 1 | 0 | 0 | 461 | 0 | 7   | 175 | 30  | 0 | 0 | NA  | NA  | NA | 1 | 0 | 3  | 0 | 0 | 130 | 72  |
| 77982and52618@29.asc | 5.26.1.18 | mafic | 1 | 0 | 0 | 461 | 1 | 1   | 50  | 50  | 0 | 0 | NA  | NA  | NA | 0 | 1 | 2  | 0 | 0 | 95  | 50  |
| 77982and52618@30.asc | 5.26.1.18 | mafic | 1 | 0 | 0 | 461 | 0 | 12  | 150 | 65  | 0 | 0 | NA  | NA  | NA | 0 | 0 | 3  | 0 | 0 | 90  | 99  |
| 77821@2.asc          | OU77821   | qfs   | 1 | 1 | 1 | 135 | 1 | 1   | 37  | 12  | 0 | 0 | NA  | NA  | NA | 0 | 0 | 3  | 0 | 0 | 40  | 21  |
| 77821@3.asc          | OU77821   | qfs   | 1 | 1 | 1 | 135 | 0 | 6   | 16  | 12  | 0 | 0 | NA  | NA  | NA | 0 | 0 | 3  | 0 | 0 | 42  | 14  |
| 77821@4.asc          | OU77821   | qfs   | 1 | 1 | 1 | 135 | 1 | 1   | 30  | 10  | 0 | 0 | NA  | NA  | NA | 0 | 0 | 3  | 0 | 0 | 14  | 17  |
| 77821@5.asc          | OU77821   | qfs   | 1 | 1 | 1 | 135 | 1 | 3   | 70  | 20  | 2 | 0 | NA  | NA  | NA | 0 | 0 | 3  | 0 | 0 | 16  | 37  |
| 77821@6.asc          | OU77821   | qfs   | 1 | 1 | 1 | 135 | 1 | 1   | 30  | 20  | 0 | 0 | NA  | NA  | NA | 0 | 0 | 3  | 0 | 0 | 20  | 24  |
| 77821@7.asc          | OU77821   | qfs   | 1 | 1 | 1 | 135 | 1 | 1   | 25  | 10  | 0 | 0 | NA  | NA  | NA | 0 | 0 | 3  | 0 | 0 | 32  | 16  |
| 77821@8.asc          | OU77821   | qfs   | 1 | 1 | 1 | 135 | 1 | 2   | 28  | 12  | 0 | 0 | NA  | NA  | NA | 0 | 0 | 3  | 0 | 0 | 78  | 18  |
| 77821@10.asc         | OU77821   | qfs   | 1 | 1 | 1 | 135 | 0 | 10  | 365 | 110 | 3 | 2 | 110 | 24  | 4  | 0 | 0 | NA | 0 | 0 | 68  | 200 |
| 77821@11.asc         | OU77821   | qfs   | 1 | 1 | 1 | 135 | 0 | 5   | 46  | 14  | 0 | 0 | NA  | NA  | NA | 0 | 0 | 3  | 0 | 0 | 40  | 25  |
| 77821and77878@2.asc  | OU77821   | qfs   | 1 | 1 | 1 | 135 | 0 | 8   | 70  | 24  | 0 | 0 | NA  | NA  | NA | 0 | 0 | 3  | 0 | 0 | 24  | 41  |
| 77821and77878@3.asc  | OU77821   | qfs   | 1 | 1 | 1 | 135 | 1 | 1   | 34  | 8   | 0 | 0 | NA  | NA  | NA | 0 | 0 | 3  | 0 | 0 | 16  | 16  |
| 77821and77878@4.asc  | OU77821   | qfs   | 1 | 1 | 1 | 135 | 0 | 6   | 70  | 40  | 0 | 0 | NA  | NA  | NA | 0 | 0 | 3  | 0 | 0 | 8   | 53  |
| 77875and52113@1.asc  | OU77875   | qfs   | 1 | 0 | 1 | 869 | 0 | 35  | 950 | 150 | 3 | 2 | 200 | 75  | 15 | 0 | 0 | 2  | 0 | 0 | 60  | 377 |
| 77875and52113@2.asc  | OU77875   | qfs   | 1 | 0 | 1 | 869 | 0 | 40  | 950 | 150 | 3 | 2 | 600 | 150 | 40 | 0 | 0 | 2  | 0 | 0 | 55  | 377 |
| 77875and52113@3.asc  | OU77875   | qfs   | 1 | 0 | 1 | 869 | 0 | 60  | 520 | 490 | 2 | 0 | NA  | NA  | NA | 0 | 0 | 2  | 0 | 0 | 145 | 505 |
| 77875and52113@4.asc  | OU77875   | qfs   | 1 | 0 | 1 | 869 | 0 | 120 | 520 | 490 | 2 | 0 | NA  | NA  | NA | 0 | 0 | 2  | 0 | 0 | 240 | 505 |
| 77875and52113@5.asc  | OU77875   | qfs   | 1 | 0 | 1 | 869 | 0 | 85  | 850 | 330 | 3 | 2 | 330 | 130 | 40 | 0 | 0 | 1  | 0 | 0 | 120 | 530 |
| 77875and52113@6.asc  | OU77875   | qfs   | 1 | 0 | 1 | 869 | 0 | 105 | 850 | 330 | 3 | 2 | 350 | 145 | 0  | 0 | 0 | 1  | 0 | 0 | 110 | 530 |
| 77875and52113@7.asc  | OU77875   | qfs   | 1 | 0 | 1 | 869 | 0 | 16  | 380 | 100 | 0 | 0 | NA  | NA  | NA | 0 | 0 | 2  | 0 | 0 | 70  | 195 |
| 77875and52113@8.asc  | OU77875   | qfs   | 1 | 0 | 1 | 869 | 0 | 55  | 470 | 110 | 0 | 0 | NA  | NA  | NA | 0 | 0 | 1  | 0 | 0 | 52  | 227 |
| 77875and52113@9.asc  | OU77875   | qfs   | 1 | 0 | 1 | 869 | 0 | 44  | 470 | 110 | 0 | 0 | NA  | NA  | NA | 0 | 1 | 1  | 0 | 0 | 36  | 227 |
| 77875and52113@10.asc | OU77875   | qfs   | 1 | 0 | 1 | 869 | 0 | 20  | 135 | 70  | 0 | 0 | NA  | NA  | NA | 0 | 0 | 3  | 0 | 0 | 20  | 97  |
| 77875and52113@11.asc | OU77875   | qfs   | 1 | 0 | 1 | 869 | 0 | 14  | 375 | 75  | 0 | 0 | NA  | NA  | NA | 0 | 0 | NA | 0 | 0 | 140 | 168 |
| 77875and52113@12.asc | OU77875   | qfs   | 1 | 0 | 1 | 869 | 1 | 1   | 24  | 12  | 0 | 0 | NA  | NA  | NA | 0 | 0 | 3  | 0 | 0 | 95  | 17  |
| 77875and52113@13.asc | OU77875   | qfs   | 1 | 0 | 1 | 869 | 0 | 45  | 360 | 110 | 0 | 0 | NA  | NA  | NA | 0 | 0 | 1  |   |   |     |     |

|                      |         |     |   |   |   |     |   |    |      |     |    |    |     |     |    |   |   |    |   |   |     |     |
|----------------------|---------|-----|---|---|---|-----|---|----|------|-----|----|----|-----|-----|----|---|---|----|---|---|-----|-----|
| 77875and52113@15.asc | OU77875 | qfs | 1 | 0 | 1 | 869 | 0 | 35 | 1360 | 100 | 3  | 0  | NA  | NA  | NA | 0 | 0 | 1  | 0 | 0 | 400 | 369 |
| 77875and52113@16.asc | OU77875 | qfs | 1 | 0 | 1 | 869 | 1 | 2  | 40   | 30  | 0  | 0  | NA  | NA  | NA | 0 | 0 | 3  | 0 | 0 | 22  | 35  |
| 77875and52113@17.asc | OU77875 | qfs | 1 | 0 | 1 | 869 | 1 | 2  | 40   | 30  | 0  | 0  | NA  | NA  | NA | 0 | 0 | 3  | 0 | 0 | 20  | 35  |
| 77875and52113@18.asc | OU77875 | qfs | 1 | 0 | 1 | 869 | 1 | 2  | 40   | 30  | 0  | 0  | NA  | NA  | NA | 1 | 0 | 3  | 0 | 0 | 24  | 35  |
| 77875and52113@19.asc | OU77875 | qfs | 1 | 0 | 1 | 869 | 1 | 2  | 40   | 40  | 0  | 0  | NA  | NA  | NA | 0 | 0 | 3  | 0 | 0 | 18  | 40  |
| 77875and52113@20.asc | OU77875 | qfs | 1 | 0 | 1 | 869 | 1 | 3  | 48   | 25  | 0  | 0  | NA  | NA  | NA | 0 | 0 | 3  | 0 | 0 | 34  | 35  |
| 77875and52113@21.asc | OU77875 | qfs | 1 | 0 | 1 | 869 | 0 | 10 | 325  | 100 | 0  | 0  | NA  | NA  | NA | 0 | 0 | 2  | 0 | 0 | 78  | 180 |
| 77875and52113@22.asc | OU77875 | qfs | 1 | 0 | 1 | 869 | 0 | 28 | 185  | 80  | 0  | 0  | NA  | NA  | NA | 0 | 0 | 1  | 0 | 0 | 28  | 122 |
| 77875and52113@23.asc | OU77875 | qfs | 1 | 0 | 1 | 869 | 1 | 2  | 100  | 60  | 0  | 0  | NA  | NA  | NA | 0 | 1 | 2  | 0 | 0 | 70  | 77  |
| 77875and52113@24.asc | OU77875 | qfs | 1 | 0 | 1 | 869 | 1 | 2  | 70   | 50  | 0  | 0  | NA  | NA  | NA | 0 | 0 | 3  | 0 | 0 | 66  | 59  |
| 77875and52113@25.asc | OU77875 | qfs | 1 | 0 | 1 | 869 | 1 | 2  | 90   | 50  | 0  | 0  | NA  | NA  | NA | 0 | 0 | 3  | 0 | 0 | 80  | 67  |
| 77875and52113@26.asc | OU77875 | qfs | 1 | 0 | 1 | 869 | 0 | 6  | 114  | 20  | 0  | 0  | NA  | NA  | NA | 0 | 0 | 3  | 0 | 0 | 50  | 48  |
| 77875and52113@27.asc | OU77875 | qfs | 1 | 0 | 1 | 869 | 0 | 6  | 75   | 60  | 0  | 0  | NA  | NA  | NA | 0 | 0 | 3  | 0 | 0 | 18  | 67  |
| 77875and52113@28.asc | OU77875 | qfs | 1 | 0 | 1 | 869 | 1 | 1  | 70   | 50  | 0  | 0  | NA  | NA  | NA | 0 | 0 | 3  | 0 | 0 | 140 | 59  |
| 77875and52113@29.asc | OU77875 | qfs | 1 | 0 | 1 | 869 | 1 | 1  | 34   | 20  | 0  | 0  | NA  | NA  | NA | 0 | 0 | 3  | 0 | 0 | 136 | 26  |
| 77875and52113@30.asc | OU77875 | qfs | 1 | 0 | 1 | 869 | 1 | 2  | 45   | 26  | 0  | 0  | NA  | NA  | NA | 0 | 0 | 3  | 0 | 0 | 125 | 34  |
| 77875and52113@31.asc | OU77875 | qfs | 1 | 0 | 1 | 869 | 0 | 8  | 50   | 20  | 0  | 0  | NA  | NA  | NA | 0 | 0 | 3  | 0 | 0 | 170 | 32  |
| 77875and52113@32.asc | OU77875 | qfs | 1 | 0 | 1 | 869 | 0 | 25 | 140  | 110 | 0  | 0  | NA  | NA  | NA | 0 | 0 | 2  | 0 | 0 | 50  | 124 |
| 77875and52113@33.asc | OU77875 | qfs | 1 | 0 | 1 | 869 | 0 | 25 | 175  | 70  | 0  | 0  | NA  | NA  | NA | 0 | 0 | 2  | 0 | 0 | 60  | 111 |
| 77875and52113@34.asc | OU77875 | qfs | 1 | 0 | 1 | 869 | 0 | 30 | 114  | 90  | 0  | 0  | NA  | NA  | NA | 0 | 0 | 1  | 0 | 0 | 30  | 101 |
| 77875and52113@35.asc | OU77875 | qfs | 1 | 0 | 1 | 869 | 0 | 14 | 210  | 55  | 0  | 0  | NA  | NA  | NA | 0 | 0 | 1  | 0 | 0 | 14  | 107 |
| 77875and52113@36.asc | OU77875 | qfs | 1 | 0 | 1 | 869 | 0 | 65 | 500  | 150 | 2  | 1  | 160 | 110 | 30 | 0 | 0 | 1  | 0 | 0 | 65  | 274 |
| 77875and52113@37.asc | OU77875 | qfs | 1 | 0 | 1 | 869 | 0 | 50 | 500  | 130 | 1  | 0  | NA  | NA  | NA | 0 | 0 | 1  | 0 | 0 | 450 | 255 |
| 77821and77878@7.asc  | OU77878 | qfs | 1 | 1 | 1 | 741 | 0 | 70 | 950  | 190 | 1  | 3  | 200 | 175 | 30 | 0 | 0 | NA | 0 | 0 | 80  | 425 |
| 77821and77878@8.asc  | OU77878 | qfs | 1 | 1 | 1 | 741 | 0 | 80 | 950  | 190 | 1  | 3  | 200 | 75  | 4  | 0 | 0 | NA | 0 | 0 | 90  | 425 |
| 77821and77878@9.asc  | OU77878 | qfs | 1 | 1 | 1 | 741 | 0 | 56 | 950  | 190 | 1  | 3  | 200 | 75  | 34 | 0 | 0 | NA | 0 | 1 | 110 | 425 |
| 77821and77878@10.asc | OU77878 | qfs | 1 | 1 | 1 | 741 | 0 | 76 | 950  | 190 | 1  | 3  | 375 | 125 | 14 | 0 | 0 | NA | 0 | 0 | 76  | 425 |
| 77821and77878@11.asc | OU77878 | qfs | 1 | 1 | 1 | 741 | 0 | 30 | 950  | 190 | 1  | 3  | 375 | 126 | 30 | 0 | 0 | NA | 0 | 0 | 30  | 425 |
| 77821and77878@12.asc | OU77878 | qfs | 1 | 1 | 1 | 741 | 0 | 8  | 315  | 70  | 0  | 0  | NA  | NA  | NA | 0 | 0 | 2  | 0 | 0 | 20  | 148 |
| 77821and77878@13.asc | OU77878 | qfs | 1 | 1 | 1 | 741 | 0 | 14 | 200  | 76  | 0  | 0  | NA  | NA  | NA | 0 | 0 | 3  | 0 | 0 | 14  | 123 |
| 77821and77878@14.asc | OU77878 | qfs | 1 | 1 | 1 | 741 | 0 | 10 | 60   | 44  | 0  | 0  | NA  | NA  | NA | 0 | 0 | 2  | 0 | 0 | 26  | 51  |
| 77821and77878@15.asc | OU77878 | qfs | 1 | 1 | 1 | 741 | 0 | 12 | 90   | 40  | 0  | 0  | NA  | NA  | NA | 0 | 0 | 2  | 0 | 0 | 16  | 60  |
| 77821and77878@16.asc | OU77878 | qfs | 1 | 1 | 1 | 741 | 2 | 1  | NA   | NA  | NA | NA | NA  | NA  | NA | 0 | 0 | NA | 0 | 0 | 10  | NA  |
| 77821and77878@17.asc | OU77878 | qfs | 1 | 1 | 1 | 741 | 0 | 30 | 175  | 100 | 1  | 0  | NA  | NA  | NA | 0 | 0 | 1  | 0 | 0 | 60  | 132 |
| 77821and77878@18.asc | OU77878 | qfs | 1 | 1 | 1 | 741 | 0 | 34 | 175  | 100 | 1  | 0  | NA  | NA  | NA | 0 | 0 | 1  | 0 | 0 | 70  | 132 |
| 77821and77878@19.asc | OU77878 | qfs | 1 | 1 | 1 | 741 | 0 | 42 | 200  | 125 | 1  | 0  | NA  | NA  | NA | 0 | 0 | 1  | 0 | 1 | 42  | 158 |
| 77821and77878@20.asc | OU77878 | qfs | 1 | 1 | 1 | 741 | 0 | 24 | 200  | 125 | 1  | 0  | NA  | NA  | NA | 0 | 0 | 1  | 0 | 0 | 60  | 158 |
| 77821and77878@21.asc | OU77878 | qfs | 1 | 1 | 1 | 741 | 0 | 6  | 50   | 28  | 0  | 0  | NA  | NA  | NA | 0 | 0 | 2  | 0 | 0 | 22  | 37  |
| 77821and77878@24.asc | OU77878 | qfs | 1 | 1 | 1 | 741 | 1 | 4  | 24   | 14  | 0  | 0  | NA  | NA  | NA | 0 | 0 | 3  | 0 | 0 | 20  | 18  |
| 77821and77878@25.asc | OU77878 | qfs | 1 | 1 | 1 | 741 | 0 | 10 | 50   | 28  | 0  | 0  | NA  | NA  | NA | 0 | 0 | 3  | 0 | 0 | 10  | 37  |
| 77821and77878@26.asc | OU77878 | qfs | 1 | 1 | 1 | 741 | 1 | 2  | 32   | 12  | 0  | 0  | NA  | NA  | NA | 0 | 0 | 3  | 0 | 0 | 6   | 20  |
| 77821and77878@27.asc | OU77878 | qfs | 1 | 1 | 1 | 741 | 1 | 2  | 40   | 24  | 0  | 0  | NA  | NA  | NA | 0 | 0 | 3  | 0 | 0 | 30  | 31  |
| 77821and77878@28.asc | OU77878 | qfs | 1 | 1 | 1 | 741 | 0 | 10 | 70   | 50  | 0  | 0  | NA  | NA  | NA | 0 | 0 | 3  | 0 | 0 | 36  | 59  |
| 77821and77878@29.asc | OU77878 | qfs | 1 | 1 | 1 | 741 | 0 | 10 | 144  | 90  | 0  | 0  | NA  | NA  | NA | 0 | 0 | 1  | 0 | 0 | 50  | 114 |
| 77821and77878@30.asc | OU77878 | qfs | 1 | 1 | 1 | 741 | 0 | 6  | 300  | 90  | 0  | 0  | NA  | NA  | NA | 0 | 0 | 1  | 0 | 0 | 90  | 164 |
| 77821and77878@31.asc | OU77878 | qfs | 1 | 1 | 1 | 741 | 0 | 38 | 300  | 90  | 0  | 0  | NA  | NA  | NA | 0 | 0 | 1  | 0 | 0 | 70  | 164 |
| 77821and77878@32.asc | OU77878 | qfs | 1 | 1 | 1 | 741 | 0 | 20 | 1000 | 220 | 0  | 0  | NA  | NA  | NA | 0 | 0 | 1  | 0 | 0 | 20  | 469 |
| 77821and77878@33.asc | OU77878 | qfs | 1 | 1 | 1 | 741 | 0 | 24 | 235  | 110 | 0  | 0  | NA  | NA  | NA | 0 | 0 | 2  | 0 | 0 | 24  | 161 |
| 77821and77878@34.asc | OU77878 | qfs | 1 | 1 | 1 | 741 | 0 | 18 | 100  | 40  | 0  | 0  | NA  | NA  | NA | 0 | 0 | 2  | 0 | 1 | 42  | 63  |
| 77821and77878@35.asc | OU77878 | qfs | 1 | 1 | 1 | 741 | 0 | 10 | 100  | 40  | 0  | 0  | NA  | NA  | NA | 0 | 0 | 2  | 0 | 0 | 16  | 63  |
| 77821and77878@36.asc | OU77878 | qfs | 1 | 1 | 1 | 741 | 1 | 4  | 30   | 20  | 0  | 0  | NA  | NA  | NA | 0 | 0 | 2  | 0 | 0 | 26  | 24  |
| 77821and77878@37.asc | OU77878 | qfs | 1 | 1 | 1 | 741 | 1 | 1  | 12   | 12  | 0  | 0  | NA  | NA  | NA | 0 | 0 | 2  | 0 | 0 | 12  | 12  |
| 77821and77878@38.asc | OU77878 | qfs | 1 | 1 | 1 | 741 | 0 | 12 | 455  | 100 | 0  | 1  | 355 | 100 | 12 | 0 | 0 | 1  | 0 | 0 | 12  | 213 |
| 77821and77878@39.asc | OU77878 | qfs | 1 | 1 | 1 | 741 | 0 | 12 | 60   | 24  | 0  | 0  | NA  | NA  | NA | 0 | 0 | 2  | 0 | 0 | 24  | 38  |
| 77821and77878@40.asc | OU77878 | qfs | 1 | 1 | 1 | 741 | 0 | 14 | 156  | 64  | 0  | 0  | NA  | NA  | NA | 0 | 0 | 1  | 0 | 0 | 44  | 100 |
| 77821and77878@42.asc | OU77878 | qfs | 1 | 1 | 1 | 741 | 1 | 1  | 50   | 20  | 0  | 0  | NA  | NA  | NA | 0 | 0 | 3  | 0 | 0 | 16  | 32  |
| 77821and77878@44.asc | OU77878 | qfs | 1 | 1 | 1 | 741 | 0 | 10 | 76   | 32  | 0  | 0  | NA  | NA  | NA | 0 | 0 | 3  | 0 | 0 | 10  | 49  |
| 77821and77878@45.asc | OU77878 | qfs | 1 | 1 | 1 | 741 | 0 | 12 | 225  | 60  | 0  | 0  | NA  | NA  | NA | 0 | 0 | 2  | 0 | 0 | 36  | 116 |
| 77821and77878@46.asc | OU77878 | qfs | 1 | 1 | 1 | 741 | 0 | 16 | 225  | 61  | 0  | 0  | NA  | NA  | NA | 0 | 0 | 2  | 0 | 0 | 24  | 117 |
| 77821and77878@47.asc | OU77878 | qfs | 1 | 1 | 1 | 741 | 1 | 2  | 150  | 50  | 0  | 0  | NA  | NA  | NA | 0 | 0 | 2  | 0 | 0 | 22  | 87  |
| 77821and77878@48.asc | OU77878 | qfs | 1 | 1 | 1 | 741 | 0 | 12 | 98   | 40  | 0  | 0  | NA  | NA  | NA | 0 | 0 | 3  | 0 | 0 | 12  | 63  |
| 77821and77878@49.asc | OU77878 | qfs | 1 | 1 | 1 | 741 | 0 | 8  | 98   | 40  | 0  | 0  | NA  | NA  | NA | 0 | 0 | 3  | 0 | 0 | 8   | 63  |
| 77821and77878@50.asc | OU77878 | qfs | 1 | 1 | 1 | 741 | 0 | 16 | 66   | 40  | 0  | 0  | NA  | NA  | NA | 0 | 0 | 3  | 0 | 0 | 16  | 51  |
| 77821and77878@51.asc | OU77878 | qfs | 1 | 1 | 1 | 741 | 0 | 5  | 225  | 180 | 0  | 0  | NA  | NA  | NA | 0 | 0 | 2  | 0 | 0 | 10  | 201 |
| 77821and77878@52.asc | OU77878 | qfs | 1 | 1 | 1 | 741 | 0 | 18 | 225  | 181 | 0  | 0  | NA  | NA  | NA | 0 | 0 | 2  | 0 | 0 | 44  | 202 |
| 77821and77878@53.asc | OU77878 | qfs | 1 | 1 | 1 | 741 | 0 | 10 | 130  | 70  | 0  | 0  | NA  | NA  | NA | 0 | 0 | 2  | 0 | 0 | 44  | 95  |
| 77821and77878@54.asc | OU77878 | qfs | 1 | 1 | 1 | 741 | 0 | 22 | 130  | 70  | 0  | 0  | NA  | NA  | NA | 0 | 0 | 2  | 0 | 0 | 22  | 95  |
| 77821and77878@55.asc | OU77878 | qfs | 1 | 1 | 1 | 741 | 0 | 10 | 80   | 32  | 0  | 0  | NA  | NA  | NA | 0 | 0 | 3  | 0 | 0 | 10  | 51  |
| 77821and77878@56.asc | OU77878 | qfs | 1 | 1 | 1 | 741 | 1 | 1  | 20   | 20  | 0  | 0  | NA  | NA  | NA | 0 | 0 | 3  | 0 | 0 | 6   | 20  |
| 77821and77878@57.asc | OU77878 | qfs | 1 | 1 | 1 | 741 | 1 | 1  | 25   | 25  | 0  | 0  | NA  | NA  | NA | 0 | 0 | 3  | 0 | 0 | 20  | 25  |
| 77821and77878@58.asc | OU77878 | qfs | 1 | 1 | 1 | 741 | 2 | 1  | NA   | NA  | NA | NA | NA  | NA  | NA | 0 | 0 | NA | 0 | 0 | 16  | NA  |
| 77913and77886@22.asc | OU77886 | qfs | 1 | 1 | 1 | 292 | 0 | 6  | 50   | 16  | 0  | 0  | NA  | NA  | NA | 0 | 0 | 3  | 0 | 0 | 16  | 28  |
| 77913and77886@23.asc | OU77886 |     |   |   |   |     |   |    |      |     |    |    |     |     |    |   |   |    |   |   |     |     |

|                      |         |       |   |   |   |     |   |    |     |      |    |    |     |     |    |   |   |    |   |   |     |     |
|----------------------|---------|-------|---|---|---|-----|---|----|-----|------|----|----|-----|-----|----|---|---|----|---|---|-----|-----|
| 77913and77886@24.asc | OU77886 | qfs   | 1 | 1 | 1 | 292 | 1 | 1  | 14  | 8    | 0  | 0  | NA  | NA  | NA | 0 | 0 | 3  | 0 | 0 | 20  | 11  |
| 77913and77886@25.asc | OU77886 | qfs   | 1 | 1 | 1 | 292 | 1 | 4  | 20  | 8    | 0  | 0  | NA  | NA  | NA | 0 | 0 | 3  | 0 | 0 | 24  | 13  |
| 77913and77886@26.asc | OU77886 | qfs   | 1 | 1 | 1 | 292 | 0 | 8  | 60  | 18   | 0  | 0  | NA  | NA  | NA | 0 | 0 | 3  | 0 | 0 | 20  | 33  |
| 77913and77886@27.asc | OU77886 | qfs   | 1 | 1 | 1 | 292 | 0 | 8  | 110 | 32   | 0  | 0  | NA  | NA  | NA | 0 | 0 | 3  | 0 | 0 | 56  | 59  |
| 77913and77886@28.asc | OU77886 | qfs   | 1 | 1 | 1 | 292 | 0 | 6  | 50  | 30   | 0  | 0  | NA  | NA  | NA | 0 | 0 | 3  | 0 | 0 | 36  | 39  |
| 77913and77886@29.asc | OU77886 | qfs   | 1 | 1 | 1 | 292 | 1 | 1  | 40  | 25   | 0  | 0  | NA  | NA  | NA | 0 | 0 | 3  | 0 | 0 | 36  | 32  |
| 77913and77886@30.asc | OU77886 | qfs   | 1 | 1 | 1 | 292 | 0 | 8  | 80  | 52   | 0  | 0  | NA  | NA  | NA | 0 | 0 | 3  | 0 | 0 | 34  | 64  |
| 77913and77886@31.asc | OU77886 | qfs   | 1 | 1 | 1 | 292 | 1 | 4  | 60  | 16   | 0  | 0  | NA  | NA  | NA | 0 | 0 | 3  | 0 | 0 | 150 | 31  |
| 77913and77886@32.asc | OU77886 | qfs   | 1 | 1 | 1 | 292 | 0 | 8  | 80  | 28   | 0  | 0  | NA  | NA  | NA | 0 | 0 | 3  | 0 | 0 | 35  | 47  |
| 77913and77886@33.asc | OU77886 | qfs   | 1 | 1 | 1 | 292 | 0 | 30 | 255 | 80   | 0  | 1  | 225 | 80  | 16 | 0 | 0 | 2  | 0 | 0 | 58  | 143 |
| 77913and77886@34.asc | OU77886 | qfs   | 1 | 1 | 1 | 292 | 0 | 8  | 130 | 25   | 0  | 0  | NA  | NA  | NA | 0 | 0 | 3  | 0 | 0 | 70  | 57  |
| 77913and77886@35.asc | OU77886 | qfs   | 1 | 1 | 1 | 292 | 0 | 36 | 400 | 125  | 0  | 1  | 225 | 90  | 0  | 0 | 0 | 2  | 0 | 0 | 78  | 224 |
| 77913and77886@36.asc | OU77886 | qfs   | 1 | 1 | 1 | 292 | 1 | 2  | 125 | 70   | 0  | 0  | NA  | NA  | NA | 0 | 0 | 3  | 0 | 0 | 92  | 94  |
| 77913and77886@37.asc | OU77886 | qfs   | 1 | 1 | 1 | 292 | 1 | 1  | 14  | 10   | 0  | 0  | NA  | NA  | NA | 0 | 0 | 3  | 0 | 0 | 70  | 12  |
| 77913and77886@38.asc | OU77886 | qfs   | 1 | 1 | 1 | 292 | 0 | 6  | 120 | 26   | 0  | 0  | NA  | NA  | NA | 0 | 0 | 3  | 0 | 0 | 20  | 56  |
| 77913and77886@39.asc | OU77886 | qfs   | 1 | 1 | 1 | 292 | 1 | 2  | 20  | 12   | 0  | 0  | NA  | NA  | NA | 0 | 0 | 2  | 0 | 0 | 26  | 15  |
| 77913and77886@40.asc | OU77886 | qfs   | 1 | 1 | 1 | 292 | 0 | 6  | 112 | 44   | 0  | 0  | NA  | NA  | NA | 0 | 0 | 2  | 0 | 0 | 40  | 70  |
| 77913and77886@41.asc | OU77886 | qfs   | 1 | 1 | 1 | 292 | 1 | 4  | 350 | 75   | 0  | 1  | 60  | 15  | 4  | 0 | 0 | 1  | 0 | 0 | 44  | 162 |
| 77913and77886@42.asc | OU77886 | qfs   | 1 | 1 | 1 | 292 | 0 | 8  | 60  | 40   | 0  | 0  | NA  | NA  | NA | 0 | 0 | 2  | 0 | 0 | 34  | 49  |
| 77913and77886@43.asc | OU77886 | qfs   | 1 | 1 | 1 | 292 | 0 | 6  | 160 | 75   | 0  | 2  | 115 | 50  | 0  | 0 | 0 | 2  | 0 | 0 | 66  | 110 |
| 77913and77886@44.asc | OU77886 | qfs   | 1 | 1 | 1 | 292 | 0 | 22 | 375 | 100  | 1  | 0  | NA  | NA  | NA | 0 | 0 | 1  | 0 | 0 | 210 | 194 |
| 77913and77886@45.asc | OU77886 | qfs   | 1 | 1 | 1 | 292 | 0 | 44 | 275 | 160  | 1  | 0  | NA  | NA  | NA | 0 | 0 | 1  | 0 | 0 | 270 | 210 |
| 77913and77886@46.asc | OU77886 | qfs   | 1 | 1 | 1 | 292 | 1 | 2  | 80  | 45   | 0  | 0  | NA  | NA  | NA | 0 | 0 | 2  | 0 | 0 | 30  | 60  |
| 77913and77886@47.asc | OU77886 | qfs   | 1 | 1 | 1 | 292 | 0 | 18 | 100 | 50   | 0  | 0  | NA  | NA  | NA | 0 | 0 | 2  | 0 | 0 | 62  | 71  |
| 77913and77886@48.asc | OU77886 | qfs   | 1 | 1 | 1 | 292 | 0 | 8  | 40  | 24   | 0  | 0  | NA  | NA  | NA | 0 | 0 | 2  | 0 | 0 | 60  | 31  |
| 77913and77886@49.asc | OU77886 | qfs   | 1 | 1 | 1 | 292 | 1 | 2  | 60  | 26   | 0  | 0  | NA  | NA  | NA | 0 | 0 | 2  | 0 | 0 | 64  | 39  |
| 77913and77886@50.asc | OU77886 | qfs   | 1 | 1 | 1 | 292 | 0 | 22 | 140 | 60   | 1  | 0  | NA  | NA  | NA | 0 | 0 | 3  | 0 | 0 | 22  | 92  |
| 77913and77886@51.asc | OU77886 | qfs   | 1 | 1 | 1 | 292 | 0 | 20 | 275 | 40   | 0  | 0  | NA  | NA  | NA | 0 | 0 | 3  | 0 | 0 | 94  | 105 |
| 77913and77886@52.asc | OU77886 | qfs   | 1 | 1 | 1 | 292 | 1 | 1  | 50  | 20   | 0  | 0  | NA  | NA  | NA | 0 | 0 | 2  | 0 | 0 | 40  | 32  |
| 77913and77886@54.asc | OU77886 | qfs   | 1 | 1 | 1 | 292 | 1 | 1  | 35  | 15   | 0  | 0  | NA  | NA  | NA | 0 | 0 | 3  | 0 | 0 | 28  | 23  |
| 77913and77886@55.asc | OU77886 | qfs   | 1 | 1 | 1 | 292 | 0 | 10 | 54  | 20   | 0  | 0  | NA  | NA  | NA | 0 | 0 | 3  | 0 | 0 | 26  | 33  |
| 77913and77886@56.asc | OU77886 | qfs   | 1 | 1 | 1 | 292 | 0 | 16 | 70  | 24   | 0  | 0  | NA  | NA  | NA | 0 | 0 | 3  | 0 | 0 | 44  | 41  |
| 77913and77886@57.asc | OU77886 | qfs   | 1 | 1 | 1 | 292 | 0 | 12 | 60  | 46   | 0  | 0  | NA  | NA  | NA | 0 | 0 | 3  | 0 | 0 | 26  | 53  |
| 78171and77887@37.asc | OU77887 | chert | 1 | 1 | 1 | 293 | 0 | 50 | 225 | 165  | 0  | 1  | 225 | 90  | 0  | 0 | 0 | 2  | 0 | 0 | 50  | 193 |
| 78171and77887@38.asc | OU77887 | mafic | 1 | 0 | 1 | 293 | 0 | 12 | 225 | 55   | 0  | 0  | NA  | NA  | NA | 1 | 0 | 2  | 0 | 0 | 175 | 111 |
| 78171and77887@39.asc | OU77887 | mafic | 1 | 0 | 1 | 293 | 2 | 2  | NA  | NA   | 0  | NA | NA  | NA  | NA | 0 | 0 | NA | 0 | 0 | 180 | NA  |
| 78171and77887@40.asc | OU77887 | mafic | 1 | 0 | 1 | 293 | 1 | 3  | 375 | 125  | 2  | 2  | 160 | 45  | 3  | 0 | 0 | 2  | 0 | 0 | 210 | 217 |
| 78171and77887@41.asc | OU77887 | mafic | 1 | 0 | 1 | 293 | 0 | 14 | 175 | 40   | 0  | 0  | NA  | NA  | NA | 0 | 0 | 2  | 0 | 0 | 115 | 84  |
| 78171and77887@42.asc | OU77887 | mafic | 1 | 0 | 1 | 293 | 0 | 20 | 350 | 70   | 0  | 0  | NA  | NA  | NA | 0 | 0 | 1  | 0 | 0 | 40  | 157 |
| 78171and77887@43.asc | OU77887 | chert | 1 | 1 | 1 | 293 | 0 | 20 | 225 | 165  | 0  | 1  | 115 | 115 | 20 | 0 | 0 | 2  | 0 | 0 | 86  | 193 |
| 78171and77887@44.asc | OU77887 | chert | 1 | 1 | 1 | 293 | 0 | 5  | 350 | 100  | 0  | 0  | NA  | NA  | NA | 0 | 0 | 2  | 0 | 0 | 60  | 187 |
| 78171and77887@45.asc | OU77887 | chert | 1 | 1 | 1 | 293 | 0 | 14 | 350 | 100  | 0  | 0  | NA  | NA  | NA | 0 | 0 | 2  | 0 | 0 | 64  | 187 |
| 78171and77887@46.asc | OU77887 | chert | 1 | 1 | 1 | 293 | 0 | 16 | 175 | 25   | 0  | 0  | NA  | NA  | NA | 0 | 0 | 2  | 0 | 0 | 20  | 66  |
| 78171and77887@47.asc | OU77887 | chert | 1 | 1 | 1 | 293 | 0 | 12 | 70  | 40   | 0  | 0  | NA  | NA  | NA | 0 | 0 | 3  | 0 | 0 | 26  | 53  |
| 78171and77887@48.asc | OU77887 | chert | 1 | 1 | 1 | 293 | 1 | 2  | 125 | 60   | 0  | 0  | NA  | NA  | NA | 0 | 0 | 3  | 0 | 0 | 6   | 87  |
| 78171and77887@49.asc | OU77887 | chert | 1 | 1 | 1 | 293 | 1 | 3  | 42  | 22   | 0  | 0  | NA  | NA  | NA | 0 | 0 | 3  | 0 | 0 | 30  | 30  |
| 78171and77887@50.asc | OU77887 | chert | 1 | 1 | 1 | 293 | 0 | 35 | 165 | 110  | 0  | 0  | NA  | NA  | NA | 0 | 0 | 3  | 0 | 0 | 50  | 135 |
| 78171and77887@51.asc | OU77887 | chert | 1 | 1 | 1 | 293 | 1 | 2  | 50  | 30   | 0  | 0  | NA  | NA  | NA | 0 | 0 | 3  | 0 | 0 | 70  | 39  |
| 78171and77887@52.asc | OU77887 | chert | 1 | 1 | 1 | 293 | 1 | 2  | 130 | 60   | 0  | 0  | NA  | NA  | NA | 0 | 0 | 3  | 0 | 0 | 50  | 88  |
| 78171and77887@53.asc | OU77887 | chert | 1 | 1 | 1 | 293 | 0 | 40 | 510 | 140  | 1  | 0  | NA  | NA  | NA | 0 | 0 | NA | 0 | 0 | 40  | 267 |
| 78171and77887@54.asc | OU77887 | chert | 1 | 1 | 1 | 293 | 0 | 14 | 510 | 140  | 1  | 0  | NA  | NA  | NA | 0 | 0 | NA | 0 | 0 | 34  | 267 |
| 78171and77887@56.asc | OU77887 | mafic | 1 | 1 | 1 | 293 | 0 | 25 | 175 | 75   | 0  | 0  | NA  | NA  | NA | 0 | 0 | 3  | 0 | 0 | 40  | 115 |
| 78171and77887@57.asc | OU77887 | mafic | 1 | 1 | 1 | 293 | 0 | 28 | 710 | 75   | 0  | 0  | NA  | NA  | NA | 0 | 0 | NA | 0 | 0 | 28  | 231 |
| 78171and77887@58.asc | OU77887 | mafic | 1 | 1 | 1 | 293 | 0 | 6  | 710 | 75   | 0  | 0  | NA  | NA  | NA | 0 | 0 | NA | 0 | 0 | 6   | 231 |
| 78171and77887@59.asc | OU77887 | mafic | 1 | 1 | 1 | 293 | 0 | 32 | 135 | 85   | 0  | 0  | NA  | NA  | NA | 0 | 0 | 3  | 0 | 0 | 32  | 107 |
| 78171and77887@60.asc | OU77887 | mafic | 1 | 1 | 1 | 293 | 0 | 14 | 122 | 32   | 0  | 0  | NA  | NA  | NA | 0 | 0 | 3  | 0 | 0 | 60  | 62  |
| 78171and77887@61.asc | OU77887 | mafic | 1 | 1 | 1 | 293 | 0 | 6  | 122 | 32   | 0  | 0  | NA  | NA  | NA | 0 | 0 | 3  | 0 | 0 | 50  | 62  |
| 78171and77887@63.asc | OU77887 | mafic | 1 | 1 | 1 | 293 | 1 | 1  | 40  | 30   | 0  | 0  | NA  | NA  | NA | 0 | 0 | 2  | 0 | 0 | 12  | 35  |
| 78171and77887@64.asc | OU77887 | mafic | 1 | 1 | 1 | 293 | 0 | 9  | 150 | 95   | 1  | 0  | NA  | NA  | NA | 0 | 0 | 2  | 0 | 0 | 42  | 119 |
| 78171and77887@65.asc | OU77887 | mafic | 1 | 1 | 1 | 293 | 0 | 56 | 150 | 95   | 1  | 0  | NA  | NA  | NA | 0 | 0 | 2  | 0 | 0 | 48  | 119 |
| 78171and77887@66.asc | OU77887 | mafic | 1 | 1 | 1 | 293 | 0 | 20 | 114 | 75   | 2  | 0  | NA  | NA  | NA | 0 | 0 | 1  | 0 | 0 | 24  | 92  |
| 78171and77887@67.asc | OU77887 | mafic | 1 | 1 | 1 | 293 | 2 | 1  | NA  | NA   | NA | NA | NA  | NA  | NA | 0 | 0 | NA | 0 | 0 | 20  | NA  |
| 78171and77887@68.asc | OU77887 | mafic | 1 | 1 | 1 | 293 | 0 | 20 | 200 | 175  | 0  | 0  | NA  | NA  | NA | 0 | 0 | 1  | 0 | 0 | 26  | 187 |
| 78171and77887@69.asc | OU77887 | mafic | 1 | 1 | 1 | 293 | 1 | 1  | 22  | 14   | 0  | 0  | NA  | NA  | NA | 0 | 0 | 3  | 0 | 0 | 16  | 18  |
| 78171and77887@70.asc | OU77887 | mafic | 1 | 1 | 1 | 293 | 0 | 6  | 105 | 25   | 0  | 0  | NA  | NA  | NA | 0 | 0 | 3  | 0 | 0 | 85  | 51  |
| 78171and77887@71.asc | OU77887 | mafic | 1 | 1 | 1 | 293 | 0 | 12 | 60  | 40   | 0  | 0  | NA  | NA  | NA | 0 | 0 | 3  | 0 | 0 | 148 | 49  |
| 78171and77887@72.asc | OU77887 | mafic | 1 | 1 | 1 | 293 | 0 | 16 | 200 | 175  | 0  | 0  | NA  | NA  | NA | 0 | 0 | 1  | 0 | 0 | 140 | 187 |
| 77900@1.asc          | OU77900 | chert | 1 | 1 | 0 | 461 | 1 | 1  | 18  | 16   | 0  | 0  | NA  | NA  | NA | 0 | 0 | 2  | 0 | 0 | 18  | 17  |
| 77900@2.asc          | OU77900 | chert | 1 | 1 | 0 | 461 | 0 | 12 | 325 | 50   | 0  | 0  | NA  | NA  | NA | 0 | 0 | 2  | 0 | 0 | 20  | 127 |
| 77900@4.asc          | OU77900 | chert | 1 | 1 | 0 | 461 | 0 | 26 | 60  | 50   | 0  | 0  | NA  | NA  | NA | 0 | 0 | 3  | 0 | 0 | 26  | 55  |
| 77900@5.asc          | OU77900 | chert | 1 | 1 | 0 | 461 | 0 | 12 | 60  | 60   | 0  | 0  | NA  | NA  | NA | 0 | 0 | 3  | 0 | 0 | 46  | 60  |
| 77900@6.asc          | OU77900 | chert | 1 | 1 | 0 | 461 | 0 | 14 | 225 | 55   | 0  | 0  | NA  | NA  | NA | 0 | 0 | 3  | 0 | 0 | 42  | 111 |
| 77900@7.asc          | OU77900 | chert | 1 | 1 | 0 | 461 | 0 | 16 | 225 | 55</ |    |    |     |     |    |   |   |    |   |   |     |     |

|                      |         |       |   |   |   |     |   |    |      |     |    |    |     |     |    |   |   |    |   |   |     |     |
|----------------------|---------|-------|---|---|---|-----|---|----|------|-----|----|----|-----|-----|----|---|---|----|---|---|-----|-----|
| 77900@9.asc          | OU77900 | chert | 1 | 1 | 0 | 461 | 0 | 10 | 85   | 55  | 0  | 0  | NA  | NA  | NA | 0 | 0 | 3  | 0 | 0 | 24  | 68  |
| 77900@10.asc         | OU77900 | chert | 1 | 1 | 0 | 461 | 0 | 12 | 85   | 55  | 0  | 0  | NA  | NA  | NA | 0 | 1 | 3  | 0 | 0 | 22  | 68  |
| 77900@11.asc         | OU77900 | chert | 1 | 1 | 0 | 461 | 0 | 10 | 195  | 50  | 0  | 0  | NA  | NA  | NA | 0 | 0 | 3  | 0 | 0 | 28  | 99  |
| 77900@12.asc         | OU77900 | chert | 1 | 1 | 0 | 461 | 0 | 10 | 195  | 50  | 0  | 0  | NA  | NA  | NA | 0 | 0 | 3  | 0 | 0 | 38  | 99  |
| 77900@13.asc         | OU77900 | chert | 1 | 1 | 0 | 461 | 0 | 12 | 225  | 75  | 0  | 0  | NA  | NA  | NA | 0 | 0 | 3  | 0 | 0 | 60  | 130 |
| 77900@14.asc         | OU77900 | chert | 1 | 1 | 0 | 461 | 0 | 36 | 225  | 75  | 0  | 0  | NA  | NA  | NA | 0 | 0 | 3  | 0 | 0 | 50  | 130 |
| 77900@15.asc         | OU77900 | chert | 1 | 1 | 0 | 461 | 0 | 20 | 225  | 75  | 0  | 0  | NA  | NA  | NA | 0 | 0 | 3  | 0 | 0 | 20  | 130 |
| 77900@16.asc         | OU77900 | chert | 1 | 1 | 0 | 461 | 1 | 4  | 45   | 18  | 0  | 0  | NA  | NA  | NA | 0 | 0 | 2  | 0 | 0 | 18  | 28  |
| 77900@17.asc         | OU77900 | chert | 1 | 1 | 0 | 461 | 0 | 8  | 50   | 50  | 0  | 0  | NA  | NA  | NA | 0 | 0 | 3  | 0 | 0 | 26  | 50  |
| 77900@18.asc         | OU77900 | chert | 1 | 1 | 0 | 461 | 1 | 3  | 190  | 70  | 0  | 0  | NA  | NA  | NA | 0 | 0 | 3  | 0 | 0 | 50  | 115 |
| 77900@19.asc         | OU77900 | chert | 1 | 1 | 0 | 461 | 1 | 1  | 250  | 60  | 0  | 0  | NA  | NA  | NA | 0 | 0 | 3  | 0 | 0 | 80  | 122 |
| 77900@20.asc         | OU77900 | chert | 1 | 1 | 0 | 461 | 0 | 6  | 175  | 35  | 0  | 0  | NA  | NA  | NA | 0 | 0 | 3  | 0 | 0 | 62  | 78  |
| 77900@21.asc         | OU77900 | chert | 1 | 1 | 0 | 461 | 0 | 18 | 200  | 65  | 0  | 2  | 125 | 20  | 10 | 0 | 1 | 3  | 0 | 0 | 38  | 114 |
| 77900@22.asc         | OU77900 | chert | 1 | 1 | 0 | 461 | 1 | 4  | 40   | 20  | 0  | 0  | NA  | NA  | NA | 0 | 0 | 1  | 0 | 0 | 14  | 28  |
| 77900@23.asc         | OU77900 | chert | 1 | 1 | 0 | 461 | 0 | 12 | 60   | 60  | 0  | 0  | NA  | NA  | NA | 0 | 0 | 3  | 0 | 0 | 28  | 60  |
| 77900@24.asc         | OU77900 | chert | 1 | 1 | 0 | 461 | 0 | 6  | 80   | 24  | 0  | 0  | NA  | NA  | NA | 0 | 0 | 3  | 0 | 0 | 40  | 44  |
| 77900@25.asc         | OU77900 | chert | 1 | 1 | 0 | 461 | 1 | 4  | 60   | 27  | 0  | 0  | NA  | NA  | NA | 0 | 0 | 3  | 0 | 0 | 54  | 40  |
| 77900@26.asc         | OU77900 | chert | 1 | 1 | 0 | 461 | 1 | 4  | 30   | 14  | 0  | 0  | NA  | NA  | NA | 0 | 1 | 3  | 0 | 0 | 14  | 20  |
| 77900@27.asc         | OU77900 | chert | 1 | 1 | 0 | 461 | 0 | 14 | 1020 | 120 | 0  | 1  | 800 | 120 | 14 | 0 | 1 | NA | 0 | 0 | 14  | 350 |
| 77900@28.asc         | OU77900 | chert | 1 | 1 | 0 | 461 | 0 | 36 | 1020 | 121 | 0  | 1  | 800 | 120 | 36 | 0 | 1 | NA | 0 | 0 | 36  | 351 |
| 77900@29.asc         | OU77900 | chert | 1 | 1 | 0 | 461 | 0 | 8  | 1020 | 122 | 0  | 1  | 800 | 120 | 36 | 0 | 1 | NA | 0 | 0 | 8   | 353 |
| 77900@30.asc         | OU77900 | chert | 1 | 1 | 0 | 461 | 0 | 20 | 1020 | 123 | 0  | 1  | 800 | 120 | 36 | 0 | 1 | NA | 0 | 0 | 20  | 354 |
| 77900@31.asc         | OU77900 | chert | 1 | 1 | 0 | 461 | 2 | 2  | NA   | NA  | NA | NA | NA  | NA  | NA | 0 | 1 | NA | 0 | 0 | 46  | NA  |
| 77900@32.asc         | OU77900 | chert | 1 | 1 | 0 | 461 | 1 | 1  | 62   | 20  | 0  | 0  | NA  | NA  | NA | 0 | 1 | 2  | 0 | 0 | 22  | 35  |
| 77900@33.asc         | OU77900 | chert | 1 | 1 | 0 | 461 | 1 | 4  | 16   | 5   | 0  | 0  | NA  | NA  | NA | 0 | 1 | 1  | 0 | 0 | 16  | 9   |
| 77900@34.asc         | OU77900 | chert | 1 | 1 | 0 | 461 | 0 | 12 | 110  | 110 | 0  | 0  | NA  | NA  | NA | 0 | 0 | 2  | 0 | 0 | 40  | 110 |
| 77900@35.asc         | OU77900 | chert | 1 | 1 | 0 | 461 | 0 | 16 | 111  | 110 | 0  | 0  | NA  | NA  | NA | 0 | 0 | 2  | 0 | 0 | 60  | 110 |
| 77900@36.asc         | OU77900 | chert | 1 | 1 | 0 | 461 | 1 | 2  | 85   | 60  | 0  | 0  | NA  | NA  | NA | 0 | 0 | 2  | 0 | 0 | 84  | 71  |
| 77900@37.asc         | OU77900 | chert | 1 | 1 | 0 | 461 | 0 | 10 | 100  | 30  | 0  | 0  | NA  | NA  | NA | 0 | 1 | 3  | 0 | 0 | 94  | 55  |
| 77900@38.asc         | OU77900 | chert | 1 | 1 | 0 | 461 | 1 | 1  | 100  | 40  | 0  | 0  | NA  | NA  | NA | 0 | 1 | 3  | 0 | 0 | 86  | 63  |
| 77900@39.asc         | OU77900 | chert | 1 | 1 | 0 | 461 | 0 | 24 | 74   | 68  | 0  | 0  | NA  | NA  | NA | 0 | 1 | 3  | 0 | 0 | 64  | 71  |
| 77900@40.asc         | OU77900 | chert | 1 | 1 | 0 | 461 | 1 | 2  | 72   | 40  | 0  | 0  | NA  | NA  | NA | 0 | 0 | 3  | 0 | 0 | 40  | 54  |
| 77900@41.asc         | OU77900 | chert | 1 | 1 | 0 | 461 | 0 | 8  | 70   | 22  | 0  | 0  | NA  | NA  | NA | 0 | 0 | 3  | 0 | 0 | 30  | 39  |
| 77900@42.asc         | OU77900 | chert | 1 | 1 | 0 | 461 | 1 | 1  | 80   | 85  | 0  | 0  | NA  | NA  | NA | 0 | 0 | 3  | 0 | 0 | 32  | 82  |
| 77900@43.asc         | OU77900 | chert | 1 | 1 | 0 | 461 | 0 | 6  | 60   | 28  | 0  | 0  | NA  | NA  | NA | 0 | 0 | 3  | 0 | 0 | 28  | 41  |
| 77900@44.asc         | OU77900 | chert | 1 | 1 | 0 | 461 | 1 | 2  | 44   | 25  | 0  | 0  | NA  | NA  | NA | 0 | 0 | 3  | 0 | 0 | 28  | 33  |
| 77900@45.asc         | OU77900 | chert | 1 | 1 | 0 | 461 | 0 | 8  | 75   | 70  | 0  | 0  | NA  | NA  | NA | 0 | 0 | 3  | 0 | 0 | 64  | 72  |
| 77900@46.asc         | OU77900 | chert | 1 | 1 | 0 | 461 | 0 | 6  | 75   | 70  | 0  | 0  | NA  | NA  | NA | 0 | 0 | 3  | 0 | 0 | 60  | 72  |
| 77900@47.asc         | OU77900 | chert | 1 | 1 | 0 | 461 | 1 | 1  | 75   | 50  | 0  | 0  | NA  | NA  | NA | 0 | 1 | 3  | 0 | 0 | 60  | 61  |
| 77900@48.asc         | OU77900 | chert | 1 | 1 | 0 | 461 | 0 | 6  | 60   | 30  | 0  | 0  | NA  | NA  | NA | 0 | 1 | 3  | 0 | 0 | 40  | 42  |
| 77900@49.asc         | OU77900 | chert | 1 | 1 | 0 | 461 | 0 | 20 | 60   | 30  | 0  | 0  | NA  | NA  | NA | 0 | 1 | 3  | 0 | 0 | 10  | 42  |
| 77900@50.asc         | OU77900 | chert | 1 | 1 | 0 | 461 | 0 | 8  | 125  | 50  | 0  | 0  | NA  | NA  | NA | 0 | 0 | 3  | 0 | 0 | 8   | 79  |
| 77900@51.asc         | OU77900 | chert | 1 | 1 | 0 | 461 | 0 | 12 | 125  | 50  | 0  | 0  | NA  | NA  | NA | 0 | 0 | 3  | 0 | 0 | 36  | 79  |
| 77900@52.asc         | OU77900 | chert | 1 | 1 | 0 | 461 | 0 | 10 | 100  | 40  | 0  | 0  | NA  | NA  | NA | 0 | 0 | 3  | 0 | 0 | 14  | 63  |
| 77900@56.asc         | OU77900 | chert | 1 | 1 | 0 | 461 | 0 | 12 | 60   | 60  | 0  | 0  | NA  | NA  | NA | 0 | 0 | 3  | 0 | 0 | 44  | 60  |
| 77900@57.asc         | OU77900 | chert | 1 | 1 | 0 | 461 | 0 | 6  | 60   | 60  | 0  | 0  | NA  | NA  | NA | 0 | 1 | 3  | 0 | 0 | 80  | 60  |
| 77900@58.asc         | OU77900 | chert | 1 | 1 | 0 | 461 | 0 | 8  | 110  | 30  | 0  | 0  | NA  | NA  | NA | 0 | 0 | 3  | 0 | 0 | 34  | 57  |
| 77900@59.asc         | OU77900 | chert | 1 | 1 | 0 | 461 | 0 | 6  | 50   | 30  | 0  | 0  | NA  | NA  | NA | 0 | 0 | 1  | 0 | 0 | 8   | 39  |
| 77900@60.asc         | OU77900 | chert | 1 | 1 | 0 | 461 | 0 | 12 | 260  | 45  | 0  | 0  | NA  | NA  | NA | 0 | 0 | 3  | 0 | 0 | 38  | 108 |
| 77900@62.asc         | OU77900 | chert | 1 | 1 | 0 | 461 | 0 | 22 | 225  | 30  | 0  | 0  | NA  | NA  | NA | 0 | 0 | 3  | 0 | 0 | 22  | 82  |
| 77900@65.asc         | OU77900 | chert | 1 | 1 | 0 | 461 | 0 | 8  | 80   | 26  | 0  | 0  | NA  | NA  | NA | 0 | 0 | 2  | 0 | 0 | 26  | 46  |
| 77900@66.asc         | OU77900 | chert | 1 | 1 | 0 | 461 | 0 | 6  | 80   | 26  | 0  | 0  | NA  | NA  | NA | 0 | 0 | 2  | 0 | 0 | 30  | 46  |
| 77900@67.asc         | OU77900 | chert | 1 | 1 | 0 | 461 | 0 | 7  | 80   | 26  | 0  | 0  | NA  | NA  | NA | 0 | 0 | 2  | 0 | 0 | 14  | 46  |
| 77900@68.asc         | OU77900 | chert | 1 | 1 | 0 | 461 | 0 | 8  | 360  | 175 | 0  | 1  | 190 | 140 | 8  | 0 | 0 | 1  | 0 | 0 | 12  | 251 |
| 77900@69.asc         | OU77900 | chert | 1 | 1 | 0 | 461 | 0 | 26 | 360  | 175 | 0  | 1  | 190 | 140 | 26 | 0 | 0 | 1  | 0 | 0 | 26  | 251 |
| 77900@70.asc         | OU77900 | chert | 1 | 1 | 0 | 461 | 0 | 20 | 410  | 115 | 0  | 0  | NA  | NA  | NA | 0 | 0 | 2  | 0 | 0 | 20  | 217 |
| 77900@71.asc         | OU77900 | chert | 1 | 1 | 0 | 461 | 0 | 48 | 410  | 115 | 0  | 0  | NA  | NA  | NA | 0 | 1 | 2  | 0 | 0 | 48  | 217 |
| 77900@72.asc         | OU77900 | chert | 1 | 1 | 0 | 461 | 0 | 42 | 410  | 115 | 0  | 0  | NA  | NA  | NA | 0 | 1 | 2  | 0 | 0 | 42  | 217 |
| 77900@75.asc         | OU77900 | chert | 1 | 1 | 0 | 461 | 0 | 22 | 350  | 115 | 0  | 0  | NA  | NA  | NA | 0 | 0 | 2  | 0 | 0 | 22  | 201 |
| 77900@76.asc         | OU77900 | chert | 1 | 1 | 0 | 461 | 0 | 12 | 350  | 115 | 0  | 0  | NA  | NA  | NA | 0 | 0 | 2  | 0 | 0 | 12  | 201 |
| 77911and78169@47.asc | OU77911 | qfs   | 1 | 0 | 0 | 118 | 0 | 6  | 120  | 46  | 0  | 0  | NA  | NA  | NA | 0 | 0 | 3  | 0 | 0 | 40  | 74  |
| 77911and78169@48.asc | OU77911 | qfs   | 1 | 0 | 0 | 118 | 0 | 16 | 74   | 24  | 0  | 0  | NA  | NA  | NA | 0 | 0 | 3  | 0 | 0 | 92  | 42  |
| 77911and78169@49.asc | OU77911 | qfs   | 1 | 0 | 0 | 118 | 1 | 4  | 32   | 12  | 0  | 0  | NA  | NA  | NA | 0 | 0 | 2  | 0 | 0 | 140 | 20  |
| 77911and78169@50.asc | OU77911 | qfs   | 1 | 0 | 0 | 118 | 0 | 30 | 350  | 175 | 0  | 1  | 200 | 40  | 8  | 0 | 0 | NA | 0 | 0 | 106 | 247 |
| 77911and78169@51.asc | OU77911 | qfs   | 1 | 0 | 0 | 118 | 2 | 2  | NA   | NA  | NA | NA | NA  | NA  | NA | 0 | 0 | NA | 0 | 0 | 58  | NA  |
| 77911test1.asc       | OU77911 | qfs   | 1 | 0 | 0 | 118 | 0 | 8  | 90   | 40  | 1  | 0  | NA  | NA  | NA | 0 | 0 | 2  | 0 | 0 | 48  | 60  |
| 77911and78169@1.asc  | OU77911 | qfs   | 1 | 0 | 0 | 118 | 1 | 2  | 80   | 40  | 0  | 0  | NA  | NA  | NA | 0 | 1 | 3  | 0 | 0 | 64  | 57  |
| 77911and78169@2.asc  | OU77911 | qfs   | 1 | 0 | 0 | 118 | 1 | 4  | 60   | 30  | 0  | 0  | NA  | NA  | NA | 0 | 0 | 3  | 0 | 0 | 40  | 42  |
| 77911and78169@3.asc  | OU77911 | qfs   | 1 | 0 | 0 | 118 | 1 | 1  | 80   | 40  | 0  | 0  | NA  | NA  | NA | 0 | 0 | 3  | 0 | 0 | 96  | 57  |
| 77911and78169@5.asc  | OU77911 | qfs   | 1 | 0 | 0 | 118 | 0 | 6  | 30   | 20  | 0  | 0  | NA  | NA  | NA | 0 | 1 | 3  | 0 | 0 | 64  | 24  |
| 77911and78169@6.asc  | OU77911 | qfs   | 1 | 0 | 0 | 118 | 1 | 1  | 105  | 40  | 0  | 0  | NA  | NA  | NA | 0 | 0 | 3  | 0 | 0 | 6   | 65  |
| 77911and78169@7.asc  | OU77911 | qfs   | 1 | 0 | 0 | 118 | 1 | 2  | 160  | 55  | 0  | 0  | NA  | NA  | NA | 0 | 0 | 3  | 0 | 0 | 44  | 94  |
| 78182and77912@1.asc  | OU77912 | mafic | 1 | 0 | 1 | 159 | 1 | 2  | 26   | 16  | 0  | 0  | NA  | NA  | NA | 0 | 0 | 3  | 0 | 0 | 14  | 20  |

|                      |         |       |   |   |   |     |   |    |      |     |    |    |    |    |    |   |   |    |   |   |     |     |
|----------------------|---------|-------|---|---|---|-----|---|----|------|-----|----|----|----|----|----|---|---|----|---|---|-----|-----|
| 78182and77912@2.asc  | OU77912 | mafic | 1 | 0 | 1 | 159 | 1 | 1  | 20   | 20  | 0  | 0  | NA | NA | NA | 0 | 0 | 3  | 0 | 0 | 76  | 20  |
| 78182and77912@4.asc  | OU77912 | mafic | 1 | 0 | 1 | 159 | 1 | 2  | 14   | 12  | 0  | 0  | NA | NA | NA | 0 | 0 | 3  | 0 | 0 | 96  | 13  |
| 78182and77912@5.asc  | OU77912 | mafic | 1 | 0 | 1 | 159 | 1 | 2  | 30   | 16  | 0  | 0  | NA | NA | NA | 0 | 0 | 3  | 0 | 0 | 68  | 22  |
| 78182and77912@6.asc  | OU77912 | mafic | 1 | 0 | 1 | 159 | 1 | 1  | 30   | 20  | 0  | 0  | NA | NA | NA | 0 | 0 | 3  | 0 | 0 | 10  | 24  |
| 78182and77912@7.asc  | OU77912 | mafic | 1 | 0 | 1 | 159 | 1 | 4  | 24   | 18  | 0  | 0  | NA | NA | NA | 0 | 0 | 3  | 0 | 0 | 28  | 21  |
| 78182and77912@8.asc  | OU77912 | mafic | 1 | 0 | 1 | 159 | 0 | 14 | 120  | 24  | 0  | 0  | NA | NA | NA | 0 | 0 | 2  | 0 | 0 | 40  | 54  |
| 78182and77912@9.asc  | OU77912 | mafic | 1 | 0 | 1 | 159 | 1 | 1  | 16   | 10  | 0  | 0  | NA | NA | NA | 0 | 0 | 3  | 0 | 0 | 120 | 13  |
| 78182and77912@10.asc | OU77912 | mafic | 1 | 0 | 1 | 159 | 1 | 1  | 18   | 10  | 0  | 0  | NA | NA | NA | 0 | 0 | 3  | 0 | 0 | 56  | 13  |
| 78182and77912@12.asc | OU77912 | mafic | 1 | 0 | 1 | 159 | 1 | 1  | 18   | 12  | 0  | 0  | NA | NA | NA | 0 | 0 | 3  | 0 | 0 | 10  | 15  |
| 78182and77912@13.asc | OU77912 | mafic | 1 | 0 | 1 | 159 | 1 | 1  | 10   | 5   | 0  | 0  | NA | NA | NA | 0 | 0 | 3  | 0 | 0 | 130 | 7   |
| 78182and77912@14.asc | OU77912 | mafic | 1 | 0 | 1 | 159 | 1 | 1  | 10   | 5   | 0  | 0  | NA | NA | NA | 0 | 0 | 3  | 0 | 0 | 24  | 7   |
| 78182and77912@15.asc | OU77912 | mafic | 1 | 0 | 1 | 159 | 0 | 6  | 450  | 70  | 3  | 1  | NA | NA | NA | 0 | 0 | NA | 0 | 0 | 8   | 177 |
| 78182and77912@18.asc | OU77912 | mafic | 1 | 0 | 1 | 159 | 1 | 2  | 24   | 10  | 0  | 0  | NA | NA | NA | 0 | 0 | 3  | 0 | 0 | 6   | 15  |
| 78182and77912@19.asc | OU77912 | mafic | 1 | 0 | 1 | 159 | 1 | 1  | 8    | 16  | 0  | 0  | NA | NA | NA | 0 | 0 | 3  | 0 | 0 | 7   | 11  |
| 78182and77912@20.asc | OU77912 | mafic | 1 | 0 | 1 | 159 | 1 | 1  | 12   | 10  | 0  | 0  | NA | NA | NA | 0 | 0 | 3  | 0 | 0 | 7   | 11  |
| 78182and77912@21.asc | OU77912 | mafic | 1 | 0 | 1 | 159 | 0 | 14 | 1600 | 100 | 0  | 0  | NA | NA | NA | 0 | 0 | NA | 0 | 0 | 14  | 400 |
| 78182and77912@22.asc | OU77912 | mafic | 1 | 0 | 1 | 159 | 0 | 46 | 1600 | 100 | 0  | 0  | NA | NA | NA | 0 | 0 | NA | 0 | 0 | 46  | 400 |
| 78182and77912@23.asc | OU77912 | mafic | 1 | 0 | 1 | 159 | 0 | 8  | 32   | 32  | 0  | 0  | NA | NA | NA | 0 | 0 | 3  | 0 | 0 | 26  | 32  |
| 78182and77912@24.asc | OU77912 | mafic | 1 | 0 | 1 | 159 | 1 | 2  | 14   | 14  | 0  | 0  | NA | NA | NA | 0 | 0 | 3  | 0 | 0 | 30  | 14  |
| 78182and77912@25.asc | OU77912 | mafic | 1 | 0 | 1 | 159 | 0 | 8  | 80   | 30  | 0  | 0  | NA | NA | NA | 0 | 0 | 2  | 0 | 0 | 36  | 49  |
| 78182and77912@26.asc | OU77912 | mafic | 1 | 0 | 1 | 159 | 1 | 1  | 24   | 15  | 0  | 0  | NA | NA | NA | 0 | 0 | 3  | 0 | 0 | 42  | 19  |
| 78182and77912@27.asc | OU77912 | mafic | 1 | 0 | 1 | 159 | 1 | 1  | 36   | 10  | 0  | 0  | NA | NA | NA | 0 | 0 | 3  | 0 | 0 | 34  | 19  |
| 78182and77912@28.asc | OU77912 | mafic | 1 | 0 | 1 | 159 | 1 | 1  | 24   | 8   | 0  | 0  | NA | NA | NA | 0 | 0 | 3  | 0 | 0 | 58  | 14  |
| 78182and77912@30.asc | OU77912 | mafic | 1 | 0 | 1 | 159 | 1 | 2  | 24   | 8   | 0  | 0  | NA | NA | NA | 0 | 0 | 3  | 0 | 0 | 20  | 14  |
| 77913and77886@8.asc  | OU77913 | chert | 1 | 1 | 0 | 137 | 0 | 8  | 64   | 22  | 0  | 0  | NA | NA | NA | 0 | 0 | 3  | 0 | 0 | 12  | 38  |
| 77913and77886@9.asc  | OU77913 | chert | 1 | 1 | 0 | 137 | 1 | 2  | 58   | 20  | 0  | 0  | NA | NA | NA | 0 | 0 | 3  | 0 | 0 | 26  | 34  |
| 77913and77886@10.asc | OU77913 | chert | 1 | 1 | 0 | 137 | 1 | 2  | 50   | 24  | 0  | 0  | NA | NA | NA | 0 | 0 | 3  | 0 | 0 | 34  | 35  |
| 77913and77886@11.asc | OU77913 | chert | 1 | 1 | 0 | 137 | 1 | 1  | 65   | 22  | 0  | 0  | NA | NA | NA | 0 | 0 | 3  | 0 | 0 | 50  | 38  |
| 77913and77886@12.asc | OU77913 | chert | 1 | 1 | 0 | 137 | 1 | 2  | 75   | 20  | 0  | 0  | NA | NA | NA | 0 | 1 | 3  | 0 | 0 | 46  | 39  |
| 77913and77886@13.asc | OU77913 | chert | 1 | 1 | 0 | 137 | 0 | 6  | 74   | 32  | 0  | 0  | NA | NA | NA | 0 | 0 | 3  | 0 | 0 | 44  | 49  |
| 77913and77886@14.asc | OU77913 | chert | 1 | 1 | 0 | 137 | 0 | 16 | 160  | 44  | 0  | 0  | NA | NA | NA | 0 | 1 | 3  | 0 | 0 | 22  | 84  |
| 77913and77886@15.asc | OU77913 | chert | 1 | 1 | 0 | 137 | 0 | 5  | 60   | 18  | 0  | 0  | NA | NA | NA | 0 | 0 | 3  | 0 | 0 | 12  | 33  |
| 77913and77886@16.asc | OU77913 | chert | 1 | 1 | 0 | 137 | 1 | 1  | 20   | 8   | 0  | 0  | NA | NA | NA | 0 | 0 | 3  | 0 | 0 | 12  | 13  |
| 77913and77886@17.asc | OU77913 | chert | 1 | 1 | 0 | 137 | 1 | 1  | 30   | 14  | 0  | 0  | NA | NA | NA | 0 | 0 | 3  | 0 | 0 | 26  | 20  |
| 77913and77886@18.asc | OU77913 | chert | 1 | 1 | 0 | 137 | 0 | 12 | 120  | 44  | 0  | 1  | 60 | 18 | 0  | 0 | 1 | 3  | 0 | 0 | 36  | 73  |
| 77913and77886@19.asc | OU77913 | chert | 1 | 1 | 0 | 137 | 0 | 6  | 30   | 16  | 0  | 0  | NA | NA | NA | 0 | 0 | 2  | 0 | 0 | 26  | 22  |
| 77913and77886@20.asc | OU77913 | chert | 1 | 1 | 0 | 137 | 0 | 16 | 180  | 70  | 0  | 0  | NA | NA | NA | 0 | 0 | 1  | 0 | 0 | 28  | 112 |
| 77913and77886@21.asc | OU77913 | chert | 1 | 1 | 0 | 137 | 2 | 1  | NA   | NA  | NA | NA | NA | NA | NA | 0 | 0 | NA | 0 | 0 | 26  | NA  |
| 77915area2@1.asc     | OU77915 | mafic | 1 | 1 | 1 | 137 | 0 | 10 | 110  | 50  | 0  | 0  | NA | NA | NA | 0 | 0 | 3  | 0 | 0 | 30  | 74  |
| 77915area2@2.asc     | OU77915 | mafic | 1 | 1 | 1 | 137 | 1 | 1  | 125  | 50  | 0  | 0  | NA | NA | NA | 0 | 0 | 3  | 0 | 0 | 34  | 79  |
| 77915area2@3.asc     | OU77915 | mafic | 1 | 1 | 1 | 137 | 0 | 5  | 75   | 40  | 0  | 0  | NA | NA | NA | 0 | 0 | 3  | 0 | 0 | 10  | 55  |
| 77915area2@5.asc     | OU77915 | mafic | 1 | 1 | 1 | 137 | 1 | 1  | 60   | 15  | 0  | 0  | NA | NA | NA | 0 | 0 | 3  | 0 | 0 | 54  | 30  |
| 77915area2@6.asc     | OU77915 | mafic | 1 | 1 | 1 | 137 | 0 | 6  | 140  | 45  | 0  | 0  | NA | NA | NA | 0 | 0 | 3  | 0 | 0 | 8   | 79  |
| 77915area2@7.asc     | OU77915 | mafic | 1 | 1 | 1 | 137 | 1 | 1  | 45   | 25  | 0  | 0  | NA | NA | NA | 0 | 0 | 3  | 0 | 0 | 12  | 34  |
| 77915area2@8.asc     | OU77915 | mafic | 1 | 1 | 1 | 137 | 1 | 1  | 20   | 10  | 0  | 0  | NA | NA | NA | 0 | 0 | 3  | 0 | 0 | 16  | 14  |
| 77915and77921@1.asc  | OU77915 | mafic | 1 | 1 | 1 | 137 | 1 | 2  | 12   | 10  | 0  | 0  | NA | NA | NA | 0 | 0 | 3  | 0 | 0 | 24  | 11  |
| 77915and77921@2.asc  | OU77915 | mafic | 1 | 1 | 1 | 137 | 1 | 1  | 14   | 12  | 0  | 0  | NA | NA | NA | 0 | 0 | 3  | 0 | 0 | 100 | 13  |
| 77915and77921@3.asc  | OU77915 | mafic | 1 | 1 | 1 | 137 | 1 | 1  | 20   | 10  | 0  | 0  | NA | NA | NA | 0 | 0 | 3  | 0 | 0 | 24  | 14  |
| 77915and77921@4.asc  | OU77915 | mafic | 1 | 1 | 1 | 137 | 1 | 1  | 28   | 20  | 0  | 0  | NA | NA | NA | 0 | 0 | 2  | 0 | 0 | 28  | 24  |
| 77915and77921@5.asc  | OU77915 | mafic | 1 | 1 | 1 | 137 | 1 | 2  | 20   | 10  | 0  | 0  | NA | NA | NA | 0 | 0 | 3  | 0 | 0 | 50  | 14  |
| 77915and77921@6.asc  | OU77915 | mafic | 1 | 1 | 1 | 137 | 1 | 1  | 24   | 12  | 0  | 0  | NA | NA | NA | 0 | 0 | 3  | 0 | 0 | 62  | 17  |
| 77915and77921@7.asc  | OU77915 | mafic | 1 | 1 | 1 | 137 | 1 | 1  | 40   | 20  | 0  | 0  | NA | NA | NA | 0 | 0 | 3  | 0 | 0 | 50  | 28  |
| 77915and77921@8.asc  | OU77915 | mafic | 1 | 1 | 1 | 137 | 0 | 6  | 40   | 20  | 0  | 0  | NA | NA | NA | 0 | 0 | 3  | 0 | 0 | 62  | 28  |
| 77915and77921@9.asc  | OU77915 | mafic | 1 | 1 | 1 | 137 | 1 | 1  | 16   | 10  | 0  | 0  | NA | NA | NA | 0 | 0 | 3  | 0 | 0 | 70  | 13  |
| 77915and77921@10.asc | OU77915 | mafic | 1 | 1 | 1 | 137 | 1 | 1  | 18   | 12  | 0  | 0  | NA | NA | NA | 0 | 0 | 3  | 0 | 0 | 56  | 15  |
| 77915and77921@11.asc | OU77915 | mafic | 1 | 1 | 1 | 137 | 0 | 8  | 50   | 16  | 0  | 0  | NA | NA | NA | 0 | 0 | 3  | 0 | 0 | 42  | 28  |
| 77915and77921@12.asc | OU77915 | mafic | 1 | 1 | 1 | 137 | 2 | 2  | NA   | NA  | NA | NA | NA | NA | NA | 0 | 0 | NA | 0 | 0 | 56  | NA  |
| 77915and77921@13.asc | OU77915 | mafic | 1 | 1 | 1 | 137 | 0 | 6  | 30   | 16  | 0  | 0  | NA | NA | NA | 0 | 0 | 2  | 0 | 0 | 26  | 22  |
| 77915and77921@14.asc | OU77915 | mafic | 1 | 1 | 1 | 137 | 1 | 4  | 87   | 60  | 0  | 0  | NA | NA | NA | 0 | 0 | 2  | 0 | 0 | 16  | 72  |
| 77915and77921@15.asc | OU77915 | mafic | 1 | 1 | 1 | 137 | 1 | 4  | 40   | 13  | 0  | 0  | NA | NA | NA | 0 | 0 | 3  | 0 | 0 | 70  | 23  |
| 77915and77921@16.asc | OU77915 | mafic | 1 | 1 | 1 | 137 | 1 | 2  | 40   | 16  | 0  | 0  | NA | NA | NA | 0 | 0 | 2  | 0 | 0 | 104 | 25  |
| 77915and77921@17.asc | OU77915 | mafic | 1 | 1 | 1 | 137 | 0 | 8  | 250  | 40  | 0  | 1  | 50 | 40 | 8  | 0 | 0 | 2  | 0 | 0 | 48  | 100 |
| 77920and77930@22.asc | OU77920 | mafic | 1 | 1 | 1 | 133 | 0 | 10 | 80   | 40  | 0  | 0  | NA | NA | NA | 0 | 0 | 3  | 0 | 0 | 24  | 57  |
| 77920and77930@23.asc | OU77920 | mafic | 1 | 1 | 1 | 133 | 0 | 6  | 80   | 40  | 0  | 0  | NA | NA | NA | 0 | 0 | 3  | 0 | 0 | 38  | 57  |
| 77920and77930@24.asc | OU77920 | mafic | 1 | 1 | 1 | 133 | 1 | 1  | 36   | 18  | 0  | 0  | NA | NA | NA | 0 | 0 | 3  | 0 | 0 | 44  | 25  |
| 77920and77930@25.asc | OU77920 | mafic | 1 | 1 | 1 | 133 | 0 | 6  | 44   | 14  | 0  | 0  | NA | NA | NA | 0 | 0 | 3  | 0 | 0 | 80  | 25  |
| 77920and77930@26.asc | OU77920 | mafic | 1 | 1 | 1 | 133 | 0 | 14 | 50   | 30  | 0  | 0  | NA | NA | NA | 0 | 0 | 3  | 0 | 0 | 90  | 39  |
| 77920and77930@27.asc | OU77920 | mafic | 1 | 1 | 1 | 133 | 1 | 1  | 80   | 45  | 0  | 0  | NA | NA | NA | 0 | 0 | 3  | 0 | 0 | 70  | 60  |
| 77920and77930@28.asc | OU77920 | mafic | 1 | 1 | 1 | 133 | 0 | 8  | 44   | 30  | 0  | 0  | NA | NA | NA | 0 | 0 | 3  | 0 | 0 | 42  | 36  |
| 77920and77930@29.asc | OU77920 | mafic | 1 | 1 | 1 | 133 | 0 | 10 | 120  | 60  | 0  | 0  | NA | NA | NA | 0 | 0 | 2  | 0 | 0 | 34  | 85  |
| 77920and77930@30.asc | OU77920 | mafic | 1 | 1 | 1 | 133 | 0 | 24 | 120  | 60  | 0  | 0  | NA | NA | NA | 0 | 0 | 2  | 0 | 0 | 64  | 85  |
| 77920and77930@31.asc | OU77920 | mafic | 1 | 1 | 1 | 133 | 1 | 1  | 80   | 40  | 0  | 0  | NA | NA | NA | 1 | 0 | 2  | 0 | 0 | 44  | 57  |
| 77920and77930@33.asc | OU77920 | mafic | 1 | 1 | 1 | 133 | 1 | 1  | 60   | 40  | 0  | 0  | NA | NA | NA | 0 | 0 | 3  | 0 | 0 | 58  | 49  |

|                      |         |       |   |   |   |     |   |    |     |     |    |    |     |     |    |   |   |    |   |   |     |     |
|----------------------|---------|-------|---|---|---|-----|---|----|-----|-----|----|----|-----|-----|----|---|---|----|---|---|-----|-----|
| 77920and77930@34.asc | OU77920 | mafic | 1 | 1 | 1 | 133 | 0 | 12 | 50  | 50  | 0  | 0  | NA  | NA  | NA | 0 | 0 | 3  | 0 | 0 | 76  | 50  |
| 77920and77930@35.asc | OU77920 | mafic | 1 | 1 | 1 | 133 | 0 | 10 | 100 | 36  | 0  | 0  | NA  | NA  | NA | 0 | 0 | 3  | 0 | 1 | 34  | 60  |
| 77920and77930@1.asc  | OU77920 | chert | 1 | 1 | 1 | 133 | 0 | 16 | 90  | 40  | 0  | 0  | NA  | NA  | NA | 0 | 0 | 2  | 0 | 0 | 16  | 60  |
| 77920and77930@2.asc  | OU77920 | chert | 1 | 1 | 1 | 133 | 1 | 2  | 55  | 30  | 0  | 0  | NA  | NA  | NA | 0 | 0 | 2  | 0 | 0 | 22  | 41  |
| 77920and77930@3.asc  | OU77920 | chert | 1 | 1 | 1 | 133 | 0 | 20 | 110 | 52  | 1  | 0  | NA  | NA  | NA | 0 | 0 | 2  | 0 | 0 | 46  | 76  |
| 77920and77930@4.asc  | OU77920 | chert | 1 | 1 | 1 | 133 | 2 | 1  | NA  | NA  | NA | NA | NA  | NA  | NA | 0 | 0 | NA | 0 | 0 | 62  | NA  |
| 77920and77930@5.asc  | OU77920 | chert | 1 | 1 | 1 | 133 | 0 | 32 | 200 | 90  | 0  | 0  | NA  | NA  | NA | 0 | 0 | 3  | 0 | 0 | 32  | 134 |
| 77920and77930@6.asc  | OU77920 | chert | 1 | 1 | 1 | 133 | 0 | 22 | 200 | 90  | 0  | 0  | NA  | NA  | NA | 0 | 0 | 3  | 0 | 0 | 24  | 134 |
| 77920and77930@7.asc  | OU77920 | chert | 1 | 1 | 1 | 133 | 2 | 2  | NA  | NA  | NA | NA | NA  | NA  | NA | 0 | 0 | NA | 0 | 0 | 80  | NA  |
| 77920and77930@8.asc  | OU77920 | chert | 1 | 1 | 1 | 133 | 0 | 6  | 115 | 55  | 0  | 0  | NA  | NA  | NA | 0 | 0 | 3  | 0 | 0 | 62  | 80  |
| 77920and77930@10.asc | OU77920 | chert | 1 | 1 | 1 | 133 | 0 | 20 | 150 | 60  | 0  | 0  | NA  | NA  | NA | 0 | 1 | 3  | 0 | 0 | 26  | 95  |
| 77920and77930@11.asc | OU77920 | chert | 1 | 1 | 1 | 133 | 0 | 6  | 325 | 70  | 0  | 0  | NA  | NA  | NA | 0 | 0 | 2  | 0 | 0 | 14  | 151 |
| 77920and77930@12.asc | OU77920 | chert | 1 | 1 | 1 | 133 | 0 | 42 | 325 | 70  | 0  | 0  | NA  | NA  | NA | 0 | 0 | 2  | 0 | 0 | 46  | 151 |
| 77920and77930@13.asc | OU77920 | chert | 1 | 1 | 1 | 133 | 0 | 14 | 325 | 70  | 0  | 0  | NA  | NA  | NA | 0 | 0 | 2  | 0 | 0 | 50  | 151 |
| 77920and77930@15.asc | OU77920 | chert | 1 | 1 | 1 | 133 | 0 | 6  | 175 | 110 | 1  | 0  | NA  | NA  | NA | 0 | 0 | 2  | 0 | 0 | 68  | 139 |
| 77920and77930@16.asc | OU77920 | chert | 1 | 1 | 1 | 133 | 0 | 8  | 100 | 80  | 0  | 0  | NA  | NA  | NA | 0 | 0 | 2  | 0 | 0 | 64  | 89  |
| 77920and77930@17.asc | OU77920 | chert | 1 | 1 | 1 | 133 | 0 | 18 | 100 | 80  | 0  | 0  | NA  | NA  | NA | 0 | 0 | 2  | 0 | 0 | 54  | 89  |
| 77920and77930@18.asc | OU77920 | chert | 1 | 1 | 1 | 133 | 0 | 10 | 90  | 34  | 0  | 0  | NA  | NA  | NA | 0 | 0 | 2  | 0 | 0 | 56  | 55  |
| 77920and77930@62.asc | OU77920 | chert | 1 | 1 | 1 | 133 | 0 | 14 | 120 | 35  | 0  | 0  | NA  | NA  | NA | 1 | 0 | 2  | 0 | 0 | 14  | 65  |
| 77920and77930@63.asc | OU77920 | chert | 1 | 1 | 1 | 133 | 1 | 4  | 20  | 15  | 0  | 0  | NA  | NA  | NA | 0 | 1 | 1  | 0 | 0 | 58  | 17  |
| 77920and77930@64.asc | OU77920 | chert | 1 | 1 | 1 | 133 | 0 | 12 | 80  | 30  | 0  | 0  | NA  | NA  | NA | 0 | 0 | 3  | 0 | 0 | 84  | 49  |
| 77920and77930@65.asc | OU77920 | chert | 1 | 1 | 1 | 133 | 0 | 6  | 74  | 44  | 0  | 0  | NA  | NA  | NA | 0 | 0 | 3  | 0 | 0 | 44  | 57  |
| 77915and77921@18.asc | OU77921 | qfs   | 1 | 1 | 0 | 83  | 1 | 1  | 195 | 105 | 0  | 0  | NA  | NA  | NA | 0 | 0 | 3  | 0 | 0 | 42  | 143 |
| 77915and77921@19.asc | OU77921 | qfs   | 1 | 1 | 0 | 83  | 1 | 1  | 195 | 105 | 0  | 0  | NA  | NA  | NA | 0 | 0 | 3  | 0 | 0 | 60  | 143 |
| 77915and77921@20.asc | OU77921 | qfs   | 1 | 1 | 0 | 83  | 1 | 2  | 195 | 105 | 0  | 0  | NA  | NA  | NA | 0 | 0 | 3  | 0 | 0 | 62  | 143 |
| 77915and77921@21.asc | OU77921 | qfs   | 1 | 1 | 0 | 83  | 1 | 2  | 195 | 105 | 0  | 0  | NA  | NA  | NA | 0 | 0 | 3  | 0 | 0 | 60  | 143 |
| 77915and77921@22.asc | OU77921 | qfs   | 1 | 1 | 0 | 83  | 1 | 3  | 195 | 105 | 0  | 0  | NA  | NA  | NA | 1 | 0 | 3  | 0 | 0 | 72  | 143 |
| 77915and77921@23.asc | OU77921 | qfs   | 1 | 1 | 0 | 83  | 0 | 8  | 275 | 115 | 0  | 1  | 125 | 50  | 8  | 0 | 0 | 3  | 0 | 0 | 90  | 178 |
| 77915and77921@24.asc | OU77921 | qfs   | 1 | 1 | 0 | 83  | 0 | 10 | 275 | 115 | 0  | 1  | 125 | 50  | 10 | 0 | 0 | 3  | 0 | 0 | 52  | 178 |
| 77915and77921@25.asc | OU77921 | qfs   | 1 | 1 | 0 | 83  | 0 | 24 | 275 | 115 | 0  | 1  | 125 | 50  | 4  | 0 | 0 | 3  | 0 | 0 | 40  | 178 |
| 77915and77921@26.asc | OU77921 | qfs   | 1 | 1 | 0 | 83  | 0 | 36 | 275 | 115 | 0  | 1  | 25  | 20  | 0  | 0 | 0 | 3  | 0 | 0 | 18  | 178 |
| 77915and77921@27.asc | OU77921 | qfs   | 1 | 1 | 0 | 83  | 0 | 10 | 60  | 30  | 0  | 0  | NA  | NA  | NA | 0 | 0 | 2  | 0 | 0 | 20  | 42  |
| 77915and77921@28.asc | OU77921 | qfs   | 1 | 1 | 0 | 83  | 0 | 20 | 130 | 75  | 0  | 3  | 80  | 36  | 10 | 0 | 0 | 2  | 0 | 0 | 50  | 99  |
| 77915and77921@29.asc | OU77921 | qfs   | 1 | 1 | 0 | 83  | 1 | 2  | 20  | 16  | 0  | 0  | NA  | NA  | NA | 0 | 0 | 1  | 0 | 0 | 58  | 18  |
| 77915and77921@30.asc | OU77921 | qfs   | 1 | 1 | 0 | 83  | 0 | 6  | 150 | 100 | 0  | 3  | 125 | 100 | 6  | 0 | 0 | 1  | 0 | 0 | 120 | 122 |
| 77915and77921@31.asc | OU77921 | qfs   | 1 | 1 | 0 | 83  | 0 | 8  | 150 | 100 | 0  | 3  | 125 | 100 | 6  | 0 | 0 | 1  | 0 | 0 | 86  | 122 |
| 77915and77921@32.asc | OU77921 | qfs   | 1 | 1 | 0 | 83  | 0 | 6  | 150 | 90  | 0  | 0  | NA  | NA  | NA | 0 | 1 | 2  | 0 | 0 | 130 | 116 |
| 77915and77921@33.asc | OU77921 | qfs   | 1 | 1 | 0 | 83  | 0 | 10 | 100 | 36  | 0  | 2  | 55  | 20  | 10 | 0 | 0 | 3  | 0 | 0 | 34  | 60  |
| 77915and77921@34.asc | OU77921 | qfs   | 1 | 1 | 0 | 83  | 0 | 6  | 140 | 40  | 1  | 0  | NA  | NA  | NA | 0 | 0 | 3  | 0 | 0 | 48  | 75  |
| 77915and77921@35.asc | OU77921 | qfs   | 1 | 1 | 0 | 83  | 0 | 6  | 40  | 28  | 1  | 0  | NA  | NA  | NA | 0 | 1 | 2  | 0 | 0 | 42  | 33  |
| 77915and77921@36.asc | OU77921 | qfs   | 1 | 1 | 0 | 83  | 0 | 12 | 82  | 42  | 0  | 0  | NA  | NA  | NA | 0 | 0 | 3  | 0 | 0 | 24  | 59  |
| 78176and77923@29.asc | OU77923 | chert | 1 | 1 | 1 | 149 | 0 | 18 | 100 | 75  | 0  | 0  | NA  | NA  | NA | 0 | 0 | 3  | 0 | 0 | 35  | 87  |
| 78176and77923@30.asc | OU77923 | chert | 1 | 1 | 1 | 149 | 1 | 2  | 150 | 60  | 0  | 0  | NA  | NA  | NA | 0 | 0 | 3  | 0 | 0 | 50  | 95  |
| 78176and77923@31.asc | OU77923 | chert | 1 | 1 | 1 | 149 | 0 | 15 | 150 | 50  | 0  | 0  | NA  | NA  | NA | 0 | 0 | 2  | 0 | 0 | 15  | 87  |
| 78176and77923@33.asc | OU77923 | chert | 1 | 1 | 1 | 149 | 1 | 2  | 800 | 75  | 3  | 3  | 40  | 10  | 4  | 0 | 0 | 0  | 0 | 0 | 25  | 245 |
| 78176and77923@34.asc | OU77923 | chert | 1 | 1 | 1 | 149 | 0 | 5  | 275 | 25  | 0  | 0  | NA  | NA  | NA | 0 | 0 | 3  | 0 | 0 | 50  | 83  |
| 78176and77923@35.asc | OU77923 | chert | 1 | 1 | 1 | 149 | 1 | 2  | 120 | 35  | 1  | 0  | NA  | NA  | NA | 0 | 0 | 2  | 0 | 0 | 110 | 65  |
| 78176and77923@36.asc | OU77923 | chert | 1 | 1 | 1 | 149 | 0 | 8  | 350 | 35  | 1  | 0  | NA  | NA  | NA | 0 | 0 | 2  | 0 | 0 | 140 | 111 |
| 78176and77923@37.asc | OU77923 | chert | 1 | 1 | 1 | 149 | 0 | 15 | 350 | 35  | 1  | 0  | NA  | NA  | NA | 0 | 0 | 2  | 0 | 0 | 125 | 111 |
| 78176and77923@38.asc | OU77923 | chert | 1 | 1 | 1 | 149 | 0 | 10 | 370 | 100 | 1  | 0  | NA  | NA  | NA | 0 | 0 | 2  | 0 | 0 | 160 | 192 |
| 78176and77923@39.asc | OU77923 | chert | 1 | 1 | 1 | 149 | 0 | 5  | 370 | 100 | 1  | 0  | NA  | NA  | NA | 0 | 0 | 2  | 0 | 0 | 105 | 192 |
| 78176and77923@40.asc | OU77923 | chert | 1 | 1 | 1 | 149 | 0 | 12 | 125 | 35  | 0  | 0  | NA  | NA  | NA | 0 | 0 | 1  | 0 | 0 | 175 | 66  |
| 78176and77923@41.asc | OU77923 | chert | 1 | 1 | 1 | 149 | 0 | 20 | 370 | 75  | 0  | 0  | NA  | NA  | NA | 0 | 0 | 2  | 0 | 0 | 175 | 167 |
| 78176and77923@42.asc | OU77923 | chert | 1 | 1 | 1 | 149 | 0 | 10 | 370 | 75  | 0  | 0  | NA  | NA  | NA | 0 | 0 | 2  | 0 | 0 | 135 | 167 |
| 78176and77923@43.asc | OU77923 | chert | 1 | 1 | 1 | 149 | 0 | 5  | 70  | 40  | 1  | 0  | NA  | NA  | NA | 0 | 0 | 2  | 0 | 0 | 40  | 53  |
| 78176and77923@44.asc | OU77923 | mafic | 1 | 1 | 1 | 149 | 0 | 20 | 200 | 50  | 0  | 0  | NA  | NA  | NA | 0 | 0 | 3  | 0 | 0 | 30  | 100 |
| 78176and77923@45.asc | OU77923 | mafic | 1 | 1 | 1 | 149 | 0 | 5  | 70  | 60  | 0  | 0  | NA  | NA  | NA | 0 | 0 | 3  | 0 | 0 | 70  | 65  |
| 78176and77923@46.asc | OU77923 | mafic | 1 | 1 | 1 | 149 | 0 | 25 | 140 | 75  | 0  | 0  | NA  | NA  | NA | 0 | 0 | 3  | 0 | 0 | 35  | 102 |
| 78176and77923@47.asc | OU77923 | mafic | 1 | 1 | 1 | 149 | 0 | 20 | 140 | 75  | 0  | 0  | NA  | NA  | NA | 0 | 0 | 3  | 0 | 0 | 40  | 102 |
| 78176and77923@48.asc | OU77923 | mafic | 1 | 1 | 1 | 149 | 0 | 5  | 100 | 35  | 1  | 0  | NA  | NA  | NA | 0 | 0 | 2  | 0 | 0 | 20  | 59  |
| 78176and77923@49.asc | OU77923 | mafic | 1 | 1 | 1 | 149 | 1 | 4  | 275 | 175 | 2  | 1  | NA  | NA  | 4  | 0 | 0 | 1  | 0 | 0 | 25  | 219 |
| 78176and77923@50.asc | OU77923 | mafic | 1 | 1 | 1 | 149 | 0 | 15 | 275 | 175 | 2  | 1  | NA  | NA  | 15 | 0 | 0 | 1  | 0 | 0 | 15  | 219 |
| 78176and77923@51.asc | OU77923 | mafic | 1 | 1 | 1 | 149 | 0 | 35 | 275 | 175 | 2  | 1  | NA  | NA  | 35 | 0 | 0 | 1  | 0 | 0 | 70  | 219 |
| 78176and77923@52.asc | OU77923 | mafic | 1 | 1 | 1 | 149 | 0 | 15 | 275 | 175 | 2  | 1  | NA  | NA  | 15 | 0 | 0 | 1  | 0 | 0 | 70  | 219 |
| 78176and77923@53.asc | OU77923 | mafic | 1 | 1 | 1 | 149 | 0 | 40 | 110 | 60  | 1  | 0  | NA  | NA  | NA | 0 | 0 | 2  | 0 | 0 | 35  | 81  |
| 77925and52111@34.asc | OU77925 | qfs   | 1 | 1 | 1 | 246 | 1 | 1  | 120 | 50  | 0  | 0  | NA  | NA  | NA | 0 | 1 | 2  | 0 | 0 | 34  | 77  |
| 77925and52111@35.asc | OU77925 | qfs   | 1 | 1 | 1 | 246 | 0 | 10 | 90  | 80  | 0  | 0  | NA  | NA  | NA | 0 | 0 | 3  | 0 | 0 | 56  | 85  |
| 77925and52111@37.asc | OU77925 | qfs   | 1 | 1 | 1 | 246 | 0 | 14 | 80  | 40  | 0  | 0  | NA  | NA  | NA | 0 | 0 | 3  | 0 | 0 | 52  | 57  |
| 77925and52111@38.asc | OU77925 | qfs   | 1 | 1 | 1 | 246 | 0 | 30 | 225 | 175 | 2  | 0  | NA  | NA  | NA | 0 | 0 | 1  | 0 | 1 | 100 | 198 |
| 77925and52111@39.asc | OU77925 | qfs   | 1 | 1 | 1 | 246 | 0 | 35 | 275 | 175 | 1  | 0  | NA  | NA  | NA | 0 | 0 | 2  | 0 | 1 | 56  | 219 |
| 77925and52111@40.asc | OU77925 | qfs   | 1 | 1 | 1 | 246 | 0 | 14 | 250 | 150 | 0  | 0  | NA  | NA  | NA | 0 | 0 | 2  | 0 | 1 | 80  | 194 |
| 77925and52111@41.asc | OU77925 | qfs   | 1 | 1 | 1 | 246 | 0 | 18 | 175 | 110 | 0  | 0  | NA  | NA  | NA | 0 | 0 | 2  | 0 | 1 | 74  | 139 |
| 77925and52111@42.asc |         |       |   |   |   |     |   |    |     |     |    |    |     |     |    |   |   |    |   |   |     |     |

|                      |         |       |   |   |   |     |   |    |     |     |    |    |     |     |    |   |   |    |   |   |     |     |
|----------------------|---------|-------|---|---|---|-----|---|----|-----|-----|----|----|-----|-----|----|---|---|----|---|---|-----|-----|
| 77925and52111@43.asc | OU77925 | qfs   | 1 | 1 | 1 | 246 | 0 | 6  | 60  | 20  | 0  | 0  | NA  | NA  | NA | 0 | 0 | 1  | 0 | 0 | 90  | 35  |
| 77925and52111@44.asc | OU77925 | qfs   | 1 | 1 | 1 | 246 | 0 | 10 | 60  | 30  | 0  | 0  | NA  | NA  | NA | 0 | 0 | 1  | 0 | 0 | 26  | 42  |
| 77925and52111@45.asc | OU77925 | qfs   | 1 | 1 | 1 | 246 | 0 | 8  | 60  | 40  | 0  | 0  | NA  | NA  | NA | 0 | 0 | 2  | 0 | 0 | 24  | 49  |
| 77925and52111@46.asc | OU77925 | qfs   | 1 | 1 | 1 | 246 | 1 | 1  | 40  | 20  | 0  | 0  | NA  | NA  | NA | 0 | 0 | 2  | 0 | 0 | 80  | 28  |
| 77925and52111@48.asc | OU77925 | qfs   | 1 | 1 | 1 | 246 | 0 | 30 | 325 | 100 | 0  | 0  | NA  | NA  | NA | 0 | 0 | 1  | 0 | 1 | 30  | 180 |
| 77925and52111@49.asc | OU77925 | qfs   | 1 | 1 | 1 | 246 | 0 | 26 | 200 | 65  | 0  | 0  | NA  | NA  | NA | 0 | 0 | 1  | 0 | 0 | 56  | 114 |
| 77925and52111@50.asc | OU77925 | qfs   | 1 | 1 | 1 | 246 | 0 | 20 | 200 | 65  | 0  | 0  | NA  | NA  | NA | 0 | 0 | 2  | 0 | 0 | 56  | 114 |
| 77925and52111@51.asc | OU77925 | qfs   | 1 | 1 | 1 | 246 | 0 | 22 | 120 | 60  | 0  | 0  | NA  | NA  | NA | 0 | 0 | 2  | 0 | 1 | 26  | 85  |
| 77925and52111@52.asc | OU77925 | qfs   | 1 | 1 | 1 | 246 | 0 | 20 | 120 | 30  | 0  | 0  | NA  | NA  | NA | 0 | 0 | 1  | 0 | 1 | 20  | 60  |
| 77925and52111@53.asc | OU77925 | qfs   | 1 | 1 | 1 | 246 | 0 | 10 | 120 | 30  | 0  | 0  | NA  | NA  | NA | 0 | 0 | 1  | 0 | 1 | 10  | 60  |
| 77925and52111@54.asc | OU77925 | qfs   | 1 | 1 | 1 | 246 | 2 | 1  | NA  | NA  | NA | NA | NA  | NA  | NA | 0 | 0 | NA | 0 | 0 | 32  | NA  |
| 77925and52111@55.asc | OU77925 | qfs   | 1 | 1 | 1 | 246 | 1 | 4  | 14  | 14  | 0  | 0  | NA  | NA  | NA | 0 | 0 | 3  | 0 | 0 | 26  | 14  |
| 77925and52111@56.asc | OU77925 | qfs   | 1 | 1 | 1 | 246 | 0 | 8  | 125 | 60  | 0  | 0  | NA  | NA  | NA | 0 | 0 | 3  | 0 | 0 | 42  | 87  |
| 77925and52111@57.asc | OU77925 | qfs   | 1 | 1 | 1 | 246 | 0 | 6  | 100 | 50  | 0  | 0  | NA  | NA  | NA | 0 | 0 | 3  | 0 | 0 | 16  | 71  |
| 77925and52111@58.asc | OU77925 | qfs   | 1 | 1 | 1 | 246 | 0 | 12 | 110 | 30  | 0  | 1  | 70  | 15  | 0  | 0 | 0 | 3  | 0 | 0 | 64  | 57  |
| 77925and52111@59.asc | OU77925 | qfs   | 1 | 1 | 1 | 246 | 1 | 1  | 90  | 35  | 0  | 0  | NA  | NA  | NA | 0 | 0 | 3  | 0 | 0 | 20  | 56  |
| 77925and52111@60.asc | OU77925 | qfs   | 1 | 1 | 1 | 246 | 0 | 56 | 410 | 185 | 0  | 2  | 150 | 65  | 4  | 0 | 0 | 2  | 0 | 1 | 80  | 275 |
| 77925and52111@61.asc | OU77925 | qfs   | 1 | 1 | 1 | 246 | 0 | 6  | 22  | 12  | 0  | 0  | NA  | NA  | NA | 0 | 0 | 3  | 0 | 0 | 144 | 16  |
| 77925and52111@62.asc | OU77925 | qfs   | 1 | 1 | 1 | 246 | 0 | 8  | 50  | 42  | 0  | 0  | NA  | NA  | NA | 0 | 0 | 3  | 0 | 0 | 70  | 46  |
| 77925and52111@63.asc | OU77925 | qfs   | 1 | 1 | 1 | 246 | 1 | 1  | 30  | 20  | 0  | 0  | NA  | NA  | NA | 0 | 0 | 1  | 0 | 0 | 52  | 24  |
| 77925and52111@64.asc | OU77925 | qfs   | 1 | 1 | 1 | 246 | 0 | 24 | 150 | 90  | 0  | 0  | NA  | NA  | NA | 0 | 0 | 3  | 0 | 1 | 24  | 116 |
| 77925and52111@65.asc | OU77925 | qfs   | 1 | 1 | 1 | 246 | 0 | 30 | 450 | 150 | 0  | 0  | NA  | NA  | NA | 0 | 0 | 1  | 0 | 1 | 110 | 260 |
| 77925and52111@66.asc | OU77925 | qfs   | 1 | 1 | 1 | 246 | 0 | 44 | 200 | 125 | 0  | 0  | NA  | NA  | NA | 0 | 0 | 3  | 0 | 0 | 70  | 158 |
| 77925and52111@67.asc | OU77925 | qfs   | 1 | 1 | 1 | 246 | 0 | 8  | 74  | 30  | 0  | 0  | NA  | NA  | NA | 0 | 0 | 2  | 0 | 0 | 30  | 47  |
| 77925and52111@68.asc | OU77925 | qfs   | 1 | 1 | 1 | 246 | 1 | 3  | 105 | 90  | 0  | 0  | NA  | NA  | NA | 0 | 0 | 3  | 0 | 0 | 6   | 97  |
| 77925and52111@69.asc | OU77925 | qfs   | 1 | 1 | 1 | 246 | 0 | 10 | 90  | 60  | 0  | 0  | NA  | NA  | NA | 0 | 0 | 3  | 0 | 0 | 70  | 73  |
| 77925and52111@72.asc | OU77925 | qfs   | 1 | 1 | 1 | 246 | 1 | 4  | 175 | 100 | 0  | 0  | NA  | NA  | NA | 0 | 0 | 3  | 0 | 1 | 96  | 132 |
| 77925and52111@73.asc | OU77925 | qfs   | 1 | 1 | 1 | 246 | 1 | 2  | 70  | 36  | 0  | 0  | NA  | NA  | NA | 0 | 0 | 3  | 0 | 0 | 58  | 50  |
| 77920and77930@37.asc | OU77930 | mafic | 1 | 1 | 1 | 515 | 1 | 4  | 60  | 35  | 0  | 0  | NA  | NA  | NA | 0 | 0 | 3  | 0 | 0 | 30  | 46  |
| 77920and77930@38.asc | OU77930 | mafic | 1 | 1 | 1 | 515 | 0 | 8  | 90  | 20  | 0  | 0  | NA  | NA  | NA | 0 | 0 | 3  | 0 | 0 | 14  | 42  |
| 77920and77930@39.asc | OU77930 | mafic | 1 | 1 | 1 | 515 | 1 | 1  | 45  | 20  | 0  | 0  | NA  | NA  | NA | 0 | 0 | 3  | 0 | 0 | 40  | 30  |
| 77920and77930@40.asc | OU77930 | mafic | 1 | 1 | 1 | 515 | 1 | 1  | 15  | 15  | 0  | 0  | NA  | NA  | NA | 0 | 0 | 2  | 0 | 0 | 12  | 15  |
| 77920and77930@41.asc | OU77930 | mafic | 1 | 1 | 1 | 515 | 0 | 22 | 200 | 50  | 0  | 0  | NA  | NA  | NA | 0 | 0 | 1  | 0 | 0 | 40  | 100 |
| 77920and77930@42.asc | OU77930 | mafic | 1 | 1 | 1 | 515 | 0 | 24 | 200 | 80  | 0  | 0  | NA  | NA  | NA | 0 | 0 | 2  | 0 | 0 | 80  | 126 |
| 77920and77930@43.asc | OU77930 | mafic | 1 | 1 | 1 | 515 | 0 | 8  | 100 | 52  | 0  | 0  | NA  | NA  | NA | 0 | 0 | 2  | 0 | 1 | 24  | 72  |
| 77920and77930@44.asc | OU77930 | mafic | 1 | 1 | 1 | 515 | 1 | 1  | 40  | 15  | 0  | 0  | NA  | NA  | NA | 0 | 0 | 3  | 0 | 0 | 6   | 24  |
| 77920and77930@47.asc | OU77930 | mafic | 1 | 1 | 1 | 515 | 0 | 6  | 50  | 20  | 0  | 0  | NA  | NA  | NA | 0 | 0 | 3  | 0 | 0 | 24  | 32  |
| 77920and77930@48.asc | OU77930 | mafic | 1 | 1 | 1 | 515 | 0 | 12 | 110 | 30  | 0  | 0  | NA  | NA  | NA | 0 | 0 | 3  | 0 | 0 | 30  | 57  |
| 77920and77930@49.asc | OU77930 | mafic | 1 | 1 | 1 | 515 | 1 | 1  | 100 | 35  | 0  | 0  | NA  | NA  | NA | 0 | 0 | 3  | 0 | 0 | 60  | 59  |
| 77920and77930@50.asc | OU77930 | mafic | 1 | 1 | 1 | 515 | 0 | 12 | 125 | 50  | 0  | 0  | NA  | NA  | NA | 0 | 0 | 3  | 0 | 0 | 64  | 79  |
| 77920and77930@51.asc | OU77930 | mafic | 1 | 1 | 1 | 515 | 0 | 20 | 74  | 64  | 0  | 0  | NA  | NA  | NA | 0 | 0 | 3  | 0 | 0 | 30  | 69  |
| 77920and77930@53.asc | OU77930 | mafic | 1 | 1 | 1 | 515 | 1 | 1  | 95  | 70  | 0  | 0  | NA  | NA  | NA | 0 | 0 | 3  | 0 | 0 | 64  | 82  |
| 77920and77930@54.asc | OU77930 | mafic | 1 | 1 | 1 | 515 | 0 | 12 | 140 | 54  | 0  | 0  | NA  | NA  | NA | 0 | 0 | 3  | 0 | 0 | 78  | 87  |
| 77920and77930@55.asc | OU77930 | mafic | 1 | 1 | 1 | 515 | 0 | 20 | 140 | 54  | 0  | 0  | NA  | NA  | NA | 0 | 0 | 3  | 0 | 0 | 66  | 87  |
| 77920and77930@56.asc | OU77930 | mafic | 1 | 1 | 1 | 515 | 0 | 10 | 140 | 54  | 0  | 0  | NA  | NA  | NA | 0 | 0 | 3  | 0 | 0 | 50  | 87  |
| 77920and77930@57.asc | OU77930 | mafic | 1 | 1 | 1 | 515 | 1 | 4  | 45  | 32  | 0  | 0  | NA  | NA  | NA | 0 | 0 | 3  | 0 | 0 | 30  | 38  |
| 77920and77930@58.asc | OU77930 | mafic | 1 | 1 | 1 | 515 | 1 | 1  | 46  | 35  | 0  | 0  | NA  | NA  | NA | 0 | 0 | 3  | 0 | 0 | 20  | 40  |
| 77920and77930@59.asc | OU77930 | mafic | 1 | 1 | 1 | 515 | 0 | 14 | 52  | 50  | 0  | 0  | NA  | NA  | NA | 0 | 0 | 3  | 0 | 0 | 16  | 51  |
| 77920and77930@60.asc | OU77930 | mafic | 1 | 1 | 1 | 515 | 0 | 10 | 52  | 50  | 0  | 0  | NA  | NA  | NA | 0 | 0 | 3  | 0 | 0 | 20  | 51  |
| 77932and77980@1.asc  | OU77932 | chert | 1 | 1 | 0 | 541 | 0 | 15 | 325 | 170 | 1  | 0  | NA  | NA  | NA | 0 | 0 | NA | 0 | 0 | 12  | 235 |
| 77932and77980@2.asc  | OU77932 | chert | 1 | 1 | 0 | 541 | 0 | 45 | 325 | 170 | 1  | 0  | NA  | NA  | NA | 0 | 0 | NA | 0 | 0 | 50  | 235 |
| 77932and77980@3.asc  | OU77932 | chert | 1 | 1 | 0 | 541 | 0 | 16 | 325 | 170 | 1  | 0  | NA  | NA  | NA | 0 | 0 | NA | 0 | 0 | 56  | 235 |
| 77932and77980@4.asc  | OU77932 | chert | 1 | 1 | 0 | 541 | 2 | 2  | NA  | NA  | NA | NA | NA  | NA  | NA | 0 | 0 | NA | 0 | 0 | 28  | NA  |
| 77932and77980@5.asc  | OU77932 | chert | 1 | 1 | 0 | 541 | 0 | 6  | 50  | 20  | 0  | 0  | NA  | NA  | NA | 0 | 0 | 2  | 0 | 0 | 8   | 32  |
| 77932and77980@6.asc  | OU77932 | chert | 1 | 1 | 0 | 541 | 0 | 10 | 50  | 32  | 0  | 0  | NA  | NA  | NA | 0 | 0 | 1  | 0 | 0 | 16  | 40  |
| 77932and77980@7.asc  | OU77932 | chert | 1 | 1 | 0 | 541 | 1 | 1  | 40  | 16  | 0  | 0  | NA  | NA  | NA | 0 | 0 | 3  | 0 | 0 | 16  | 25  |
| 77932and77980@8.asc  | OU77932 | chert | 1 | 1 | 0 | 541 | 1 | 1  | 100 | 20  | 0  | 0  | NA  | NA  | NA | 0 | 0 | 2  | 0 | 0 | 5   | 45  |
| 77932and77980@10.asc | OU77932 | chert | 1 | 1 | 0 | 541 | 0 | 14 | 125 | 65  | 0  | 0  | NA  | NA  | NA | 0 | 0 | 2  | 0 | 0 | 22  | 90  |
| 77932and77980@11.asc | OU77932 | chert | 1 | 1 | 0 | 541 | 1 | 1  | 44  | 20  | 0  | 0  | NA  | NA  | NA | 0 | 0 | 1  | 0 | 0 | 20  | 30  |
| 77932and77980@12.asc | OU77932 | chert | 1 | 1 | 0 | 541 | 0 | 12 | 410 | 150 | 0  | 1  | 275 | 100 | 12 | 0 | 0 | NA | 0 | 0 | 20  | 248 |
| 77932and77980@13.asc | OU77932 | chert | 1 | 1 | 0 | 541 | 0 | 12 | 410 | 151 | 0  | 1  | 275 | 100 | 12 | 0 | 0 | NA | 0 | 0 | 22  | 249 |
| 77932and77980@14.asc | OU77932 | mafic | 1 | 1 | 0 | 541 | 0 | 22 | 130 | 58  | 1  | 0  | NA  | NA  | NA | 0 | 0 | 1  | 0 | 0 | 22  | 87  |
| 77932and77980@15.asc | OU77932 | mafic | 1 | 1 | 0 | 541 | 1 | 4  | 190 | 35  | 1  | 0  | NA  | NA  | NA | 0 | 0 | 1  | 0 | 0 | 60  | 82  |
| 77932and77980@16.asc | OU77932 | mafic | 1 | 1 | 0 | 541 | 1 | 1  | 125 | 25  | 0  | 0  | NA  | NA  | NA | 0 | 0 | 2  | 0 | 0 | 56  | 56  |
| 77932and77980@17.asc | OU77932 | mafic | 1 | 1 | 0 | 541 | 0 | 12 | 50  | 24  | 0  | 0  | NA  | NA  | NA | 0 | 0 | 3  | 0 | 0 | 52  | 35  |
| 77932and77980@18.asc | OU77932 | mafic | 1 | 1 | 0 | 541 | 1 | 2  | 50  | 20  | 0  | 0  | NA  | NA  | NA | 0 | 0 | 3  | 0 | 0 | 14  | 32  |
| 77932and77980@19.asc | OU77932 | mafic | 1 | 1 | 0 | 541 | 1 | 1  | 50  | 20  | 0  | 0  | NA  | NA  | NA | 0 | 0 | 2  | 0 | 0 | 54  | 32  |
| 77932and77980@20.asc | OU77932 | mafic | 1 | 1 | 0 | 541 | 0 | 10 | 70  | 25  | 0  | 0  | NA  | NA  | NA | 0 | 0 | 3  | 0 | 0 | 16  | 42  |
| 77932and77980@21.asc | OU77932 | mafic | 1 | 1 | 0 | 541 | 0 | 8  | 90  | 54  | 0  | 0  | NA  | NA  | NA | 0 | 0 | 3  | 0 | 0 | 14  | 70  |
| 77932and77980@22.asc | OU77932 | mafic | 1 | 1 | 0 | 541 | 0 | 6  | 245 | 45  | 0  | 0  | NA  | NA  | NA | 0 | 0 | 1  | 0 | 0 | 60  | 105 |
| 77932and77980@23.asc | OU77932 | mafic | 1 | 1 | 0 | 541 | 2 | 1  | NA  | NA  | NA | NA | NA  | NA  | NA | 0 | 0 | NA | 0 | 0 | 62  | NA  |
| 77932and77980@24.asc | OU77932 | mafic | 1 | 1 | 0 | 541 | 0 | 6  | 40  | 40  | 0  | 0  | NA  | NA  | NA | 0 | 0 | 1  | 0 | 1 | 18  | 40  |
| 77932and77980@25.asc | OU77932 | mafic | 1 | 1 | 0 | 541 | 1 | 2  | 30  | 22  | 0  |    |     |     |    |   |   |    |   |   |     |     |



|                      |         |       |   |    |    |      |   |     |      |      |    |    |     |     |    |   |   |    |   |   |     |     |
|----------------------|---------|-------|---|----|----|------|---|-----|------|------|----|----|-----|-----|----|---|---|----|---|---|-----|-----|
| 77932and77980@26.asc | OU77932 | mafic | 1 | 1  | 0  | 541  | 0 | 16  | 90   | 40   | 1  | 0  | NA  | NA  | NA | 0 | 0 | 1  | 0 | 0 | 64  | 60  |
| 77932and77980@27.asc | OU77932 | mafic | 1 | 1  | 0  | 541  | 1 | 8   | 90   | 40   | 1  | 0  | NA  | NA  | NA | 0 | 0 | 1  | 0 | 0 | 8   | 60  |
| 77932and77980@28.asc | OU77932 | mafic | 1 | 1  | 0  | 541  | 0 | 18  | 95   | 65   | 0  | 0  | NA  | NA  | NA | 0 | 0 | 1  | 0 | 0 | 56  | 79  |
| 77932and77980@29.asc | OU77932 | mafic | 1 | 1  | 0  | 541  | 0 | 8   | 130  | 26   | 0  | 0  | NA  | NA  | NA | 0 | 0 | 2  | 0 | 0 | 40  | 58  |
| 77932and77980@30.asc | OU77932 | mafic | 1 | 1  | 0  | 541  | 1 | 2   | 140  | 30   | 0  | 0  | NA  | NA  | NA | 0 | 0 | 2  | 0 | 0 | 38  | 65  |
| 77932and77980@31.asc | OU77932 | mafic | 1 | 1  | 0  | 541  | 1 | 1   | 90   | 30   | 0  | 0  | NA  | NA  | NA | 0 | 0 | 2  | 0 | 0 | 26  | 52  |
| 77932and77980@32.asc | OU77932 | mafic | 1 | 1  | 0  | 541  | 1 | 1   | 60   | 22   | 0  | 0  | NA  | NA  | NA | 0 | 0 | 3  | 0 | 0 | 40  | 36  |
| 77932and77980@33.asc | OU77932 | mafic | 1 | 1  | 0  | 541  | 1 | 1   | 30   | 20   | 0  | 0  | NA  | NA  | NA | 0 | 0 | 3  | 0 | 0 | 20  | 24  |
| 77932and77980@34.asc | OU77932 | mafic | 1 | 1  | 0  | 541  | 1 | 2   | 28   | 16   | 0  | 0  | NA  | NA  | NA | 0 | 0 | 3  | 0 | 0 | 28  | 21  |
| 77932and77980@36.asc | OU77932 | mafic | 1 | 1  | 0  | 541  | 0 | 8   | 52   | 16   | 0  | 0  | NA  | NA  | NA | 0 | 0 | 3  | 0 | 0 | 45  | 29  |
| 77932and77980@39.asc | OU77932 | mafic | 1 | 1  | 0  | 541  | 1 | 2   | 76   | 28   | 0  | 0  | NA  | NA  | NA | 0 | 0 | 3  | 0 | 0 | 10  | 46  |
| 77932and77980@40.asc | OU77980 | qfs   | 1 | 1  | 1  | 1090 | 0 | 16  | 175  | 75   | 1  | 0  | NA  | NA  | NA | 0 | 0 | 2  | 0 | 0 | 30  | 115 |
| 77932and77980@41.asc | OU77980 | qfs   | 1 | 1  | 1  | 1090 | 1 | 4   | 52   | 40   | 0  | 0  | NA  | NA  | NA | 0 | 0 | 2  | 0 | 0 | 30  | 46  |
| 77932and77980@42.asc | OU77980 | qfs   | 1 | 1  | 1  | 1090 | 0 | 7   | 1130 | 200  | 1  | 0  | NA  | NA  | NA | 0 | 0 | 2  | 0 | 0 | 70  | 475 |
| 77932and77980@43.asc | OU77980 | qfs   | 1 | 1  | 1  | 1090 | 0 | 55  | 1130 | 200  | 1  | 0  | NA  | NA  | NA | 0 | 0 | 2  | 0 | 0 | 60  | 475 |
| 77932and77980@44.asc | OU77980 | qfs   | 1 | 1  | 1  | 1090 | 0 | 102 | 1130 | 200  | 1  | 0  | NA  | NA  | NA | 0 | 0 | 2  | 0 | 0 | 102 | 475 |
| 77932and77980@45.asc | OU77980 | qfs   | 1 | 1  | 1  | 1090 | 0 | 80  | 1130 | 200  | 1  | 0  | NA  | NA  | NA | 0 | 0 | 2  | 0 | 0 | 56  | 475 |
| 77932and77980@46.asc | OU77980 | qfs   | 1 | 1  | 1  | 1090 | 0 | 20  | 1130 | 200  | 1  | 0  | NA  | NA  | NA | 0 | 0 | 2  | 0 | 0 | 36  | 475 |
| 77932and77980@47.asc | OU77980 | qfs   | 1 | 1  | 1  | 1090 | 0 | 6   | 48   | 32   | 0  | 0  | NA  | NA  | NA | 0 | 0 | NA | 0 | 0 | 46  | 39  |
| 77932and77980@48.asc | OU77980 | qfs   | 1 | 1  | 1  | 1090 | 0 | 26  | 510  | 90   | 1  | 0  | NA  | NA  | NA | 0 | 0 | 2  | 0 | 0 | 40  | 214 |
| 77932and77980@49.asc | OU77980 | qfs   | 1 | 1  | 1  | 1090 | 0 | 6   | 950  | 60   | 0  | 0  | NA  | NA  | NA | 0 | 0 | 2  | 0 | 0 | 60  | 239 |
| 77932and77980@50.asc | OU77980 | qfs   | 1 | 1  | 1  | 1090 | 0 | 16  | 245  | 50   | 2  | 1  | 110 | 44  | 10 | 0 | 0 | 2  | 0 | 1 | 16  | 111 |
| 77932and77980@51.asc | OU77980 | qfs   | 1 | 1  | 1  | 1090 | 1 | 1   | 190  | 40   | 0  | 0  | NA  | NA  | NA | 0 | 0 | 2  | 0 | 0 | 30  | 87  |
| 77932and77980@52.asc | OU77980 | qfs   | 1 | 1  | 1  | 1090 | 0 | 16  | 170  | 90   | 3  | 0  | NA  | NA  | NA | 0 | 0 | 2  | 0 | 1 | 46  | 124 |
| 77932and77980@53.asc | OU77980 | qfs   | 1 | 1  | 1  | 1090 | 0 | 26  | 170  | 90   | 3  | 0  | NA  | NA  | NA | 0 | 0 | 2  | 0 | 0 | 52  | 124 |
| 77932and77980@54.asc | OU77980 | qfs   | 1 | 1  | 1  | 1090 | 1 | 2   | 190  | 30   | 0  | 0  | NA  | NA  | NA | 0 | 0 | 2  | 0 | 0 | 80  | 75  |
| 77932and77980@55.asc | OU77980 | qfs   | 1 | 1  | 1  | 1090 | 0 | 30  | 450  | 325  | 3  | 3  | 425 | 85  | 30 | 0 | 0 | NA | 0 | 0 | 40  | 382 |
| 77932and77980@56.asc | OU77980 | qfs   | 1 | 1  | 1  | 1090 | 0 | 40  | 450  | 325  | 3  | 3  | 425 | 85  | 28 | 0 | 0 | NA | 0 | 1 | 110 | 382 |
| 77932and77980@57.asc | OU77980 | qfs   | 1 | 1  | 1  | 1090 | 0 | 68  | 450  | 325  | 3  | 3  | 235 | 130 | 64 | 0 | 0 | NA | 0 | 0 | 68  | 382 |
| 77932and77980@58.asc | OU77980 | qfs   | 1 | 1  | 1  | 1090 | 0 | 6   | 450  | 325  | 3  | 3  | 235 | 130 | 6  | 0 | 0 | NA | 0 | 0 | 50  | 382 |
| 77932and77980@59.asc | OU77980 | qfs   | 1 | 1  | 1  | 1090 | 1 | 2   | 32   | 26   | 0  | 0  | NA  | NA  | NA | 0 | 0 | 3  | 0 | 0 | 22  | 29  |
| 77932and77980@61.asc | OU77980 | qfs   | 1 | 1  | 1  | 1090 | 1 | 3   | 130  | 40   | 0  | 0  | NA  | NA  | NA | 0 | 0 | 1  | 0 | 0 | 6   | 72  |
| 77932and77980@62.asc | OU77980 | qfs   | 1 | 1  | 1  | 1090 | 0 | 6   | 110  | 50   | 0  | 0  | NA  | NA  | NA | 0 | 0 | 1  | 0 | 0 | 40  | 74  |
| 77932and77980@63.asc | OU77980 | qfs   | 1 | 1  | 1  | 1090 | 1 | 1   | 44   | 15   | 0  | 0  | NA  | NA  | NA | 0 | 0 | 3  | 0 | 0 | 7   | 26  |
| 77932and77980@64.asc | OU77980 | qfs   | 1 | 1  | 1  | 1090 | 0 | 40  | 395  | 85   | 1  | 1  | 110 | 70  | 0  | 0 | 0 | NA | 0 | 0 | 50  | 183 |
| 77932and77980@65.asc | OU77980 | qfs   | 1 | 1  | 1  | 1090 | 0 | 6   | 100  | 20   | 0  | 0  | NA  | NA  | NA | 0 | 0 | 2  | 0 | 0 | 50  | 45  |
| 77932and77980@66.asc | OU77980 | qfs   | 1 | 1  | 1  | 1090 | 0 | 16  | 350  | 100  | 1  | 0  | NA  | NA  | NA | 0 | 0 | 1  | 0 | 0 | 12  | 187 |
| 77932and77980@67.asc | OU77980 | qfs   | 1 | 1  | 1  | 1090 | 1 | 1   | 145  | 45   | 0  | 0  | NA  | NA  | NA | 0 | 0 | 2  | 0 | 0 | 10  | 81  |
| 77932and77980@68.asc | OU77980 | qfs   | 1 | 1  | 1  | 1090 | 0 | 14  | 190  | 34   | 0  | 2  | 125 | 18  | 0  | 0 | 0 | 2  | 0 | 0 | 8   | 80  |
| 77932and77980@69.asc | OU77980 | qfs   | 1 | 1  | 1  | 1090 | 1 | 2   | 32   | 25   | 0  | 0  | NA  | NA  | NA | 0 | 0 | 2  | 0 | 0 | 20  | 28  |
| 77932and77980@70.asc | OU77980 | qfs   | 1 | 1  | 1  | 1090 | 0 | 7   | 1340 | 220  | 0  | 0  | NA  | NA  | NA | 0 | 0 | NA | 0 | 0 | 22  | 543 |
| 77932and77980@71.asc | OU77980 | qfs   | 1 | 1  | 1  | 1090 | 2 | 4   | NA   | NA   | NA | NA | NA  | NA  | NA | 0 | 0 | NA | 0 | 0 | 22  | NA  |
| 77932and77980@72.asc | OU77980 | qfs   | 1 | 1  | 1  | 1090 | 0 | 16  | 180  | 50   | 0  | 0  | NA  | NA  | NA | 0 | 0 | 1  | 0 | 0 | 36  | 95  |
| 77932and77980@73.asc | OU77980 | qfs   | 1 | 1  | 1  | 1090 | 1 | 1   | 48   | 17   | 0  | 1  | NA  | NA  | NA | 0 | 0 | 1  | 0 | 0 | 22  | 29  |
| 77932and77980@74.asc | OU77980 | qfs   | 1 | 1  | 1  | 1090 | 1 | 2   | 20   | 20   | 0  | 0  | NA  | NA  | NA | 0 | 0 | 3  | 0 | 0 | 8   | 20  |
| 77932and77980@75.asc | OU77980 | qfs   | 1 | 1  | 1  | 1090 | 0 | 20  | 1340 | 220  | 0  | 0  | NA  | NA  | NA | 0 | 0 | NA | 0 | 0 | 36  | 543 |
| 77932and77980@76.asc | OU77980 | qfs   | 1 | 1  | 1  | 1090 | 0 | 75  | 1340 | 220  | 0  | 0  | NA  | NA  | NA | 0 | 0 | NA | 0 | 0 | 75  | 543 |
| 77982 test spot      | OU77982 | qfs   | 1 | 1  | 0  | 942  | 0 | 5   | 60   | 35   | 0  | 0  | NA  | NA  | NA | 0 | 0 | 3  | 0 | 1 | 40  | 46  |
| 77982and52618@1.asc  | OU77982 | qfs   | 1 | 1  | 0  | 942  | 1 | 1   | 25   | 25   | 0  | 0  | NA  | NA  | NA | 0 | 0 | 2  | 0 | 0 | 45  | 25  |
| 77982and52618@2.asc  | OU77982 | qfs   | 1 | 1  | 0  | 942  | 1 | 1.5 | 30   | 20   | 0  | 0  | NA  | NA  | NA | 0 | 0 | 3  | 0 | 0 | 40  | 24  |
| 77982and52618@3.asc  | OU77982 | qfs   | 1 | 1  | 0  | 942  | 0 | 16  | 60   | 35   | 0  | 0  | NA  | NA  | NA | 0 | 0 | 3  | 0 | 0 | 50  | 46  |
| 77982and52618@4.asc  | OU77982 | qfs   | 1 | 1  | 0  | 942  | 1 | 1   | 18   | 10   | 0  | 0  | NA  | NA  | NA | 0 | 0 | 3  | 0 | 0 | 210 | 13  |
| 77982and52618@5.asc  | OU77982 | qfs   | 1 | 1  | 0  | 942  | 1 | 1   | 18   | 10   | 0  | 0  | NA  | NA  | NA | 0 | 0 | 3  | 0 | 0 | 205 | 13  |
| 77982and52618@6.asc  | OU77982 | qfs   | 1 | 1  | 0  | 942  | 1 | 1   | 18   | 10   | 0  | 0  | NA  | NA  | NA | 0 | 0 | 3  | 0 | 0 | 230 | 13  |
| 77982and52618@7.asc  | OU77982 | qfs   | 1 | 1  | 0  | 942  | 1 | 4   | 40   | 18   | 0  | 0  | NA  | NA  | NA | 0 | 0 | 3  | 0 | 0 | 290 | 27  |
| 77982and52618@8.asc  | OU77982 | qfs   | 1 | 1  | 0  | 942  | 1 | 7   | 44   | 26   | 0  | 0  | NA  | NA  | NA | 0 | 0 | 1  | 0 | 1 | 310 | 34  |
| 77982and52618@9.asc  | OU77982 | qfs   | 1 | 1  | 0  | 942  | 0 | 8   | 74   | 66   | 0  | 0  | NA  | NA  | NA | 0 | 0 | 3  | 0 | 0 | 210 | 70  |
| 77982and52618@10.asc | OU77982 | qfs   | 1 | 1  | 0  | 942  | 0 | 12  | 360  | 100  | 0  | 0  | NA  | NA  | NA | 1 | 0 | 0  | 0 | 0 | 390 | 190 |
| 77982and52618@11.asc | OU77982 | qfs   | 1 | 1  | 0  | 942  | 1 | 1   | 24   | 24   | 0  | 0  | NA  | NA  | NA | 0 | 0 | 2  | 0 | 0 | 225 | 24  |
| 77982and52618@12.asc | OU77982 | qfs   | 1 | 1  | 0  | 942  | 0 | 8   | 80   | 30   | 0  | 0  | NA  | NA  | NA | 0 | 0 | 3  | 0 | 0 | 180 | 49  |
| ST12Civ@1.asc        | ST12Civ | qfs   | 3 | NA | NA | 800  | 0 | 20  | 550  | 220  | 0  | 1  | 250 | 75  | 5  | 0 | 1 | 2  | 0 | 0 | 110 | 348 |
| ST12Civ@2.asc        | ST12Civ | qfs   | 3 | NA | NA | 800  | 1 | 4   | 260  | 70   | 0  | 0  | NA  | NA  | NA | 0 | 1 | 2  | 0 | 0 | 135 | 135 |
| ST12Civ@3.asc        | ST12Civ | qfs   | 3 | NA | NA | 800  | 1 | 2   | 500  | 130  | 2  | 1  | 175 | 75  | 2  | 0 | 0 | 2  | 0 | 0 | 125 | 255 |
| ST12Civ@4.asc        | ST12Civ | qfs   | 3 | NA | NA | 800  | 0 | 5   | 750  | 230  | 2  | 1  | NA  | NA  | 0  | 0 | 1 | 2  | 0 | 0 | 250 | 415 |
| ST12Civ@5.asc        | ST12Civ | qfs   | 3 | NA | NA | 800  | 0 | 100 | 750  | 230  | 2  | 1  | NA  | NA  | 0  | 0 | 0 | 2  | 0 | 0 | 190 | 415 |
| ST12Civ@6.asc        | ST12Civ | qfs   | 3 | NA | NA | 800  | 0 | 5   | 90   | 25   | 0  | 0  | NA  | NA  | NA | 0 | 0 | 0  | 0 | 0 | 165 | 47  |
| ST12Civ@7.asc        | ST12Civ | qfs   | 3 | NA | NA | 800  | 0 | 10  | 175  | 75   | 1  | 0  | NA  | NA  | NA | 0 | 0 | 3  | 0 | 0 | 155 | 115 |
| ST12Civ@8.asc        | ST12Civ | qfs   | 3 | NA | NA | 800  | 0 | 5   | 40   | 25   | 0  | 0  | NA  | NA  | NA | 0 | 0 | 1  | 0 | 0 | 210 | 32  |
| ST12Civ@9.asc        | ST12Civ | qfs   | 3 | NA | NA | 800  | 1 | 1   | 150  | 90   | 0  | 0  | NA  | NA  | NA | 0 | 0 | 3  | 0 | 0 | 260 | 116 |
| ST12Civ@10.asc       | ST12Civ | qfs   | 3 | NA | NA | 800  | 0 | 10  | 110  | 245  | 0  | 0  | NA  | NA  | NA | 0 | 0 | 3  | 0 | 0 | 100 | 164 |
| ST12Civ@11.asc       | ST12Civ | qfs   | 3 | NA | NA | 800  | 0 | 25  | 160  | 70   | 0  | 0  | NA  | NA  | NA | 0 | 0 | 3  | 0 | 0 | 85  | 106 |
| ST12Civ@12.asc       | ST12Civ | qfs   | 3 | NA | NA | 800  | 0 | 5   | 65   | 30   | 0  | 0  | NA  | NA  | NA | 0 | 0 | 2  | 0 | 0 | 15  | 44  |
| ST12Civ@13.asc       | ST12Civ | qfs   | 3 | NA | NA | 800  | 0 | 10  | 200  | 80</ |    |    |     |     |    |   |   |    |   |   |     |     |

|                |         |     |   |    |    |     |   |     |      |     |   |   |      |     |    |   |   |    |   |   |      |     |
|----------------|---------|-----|---|----|----|-----|---|-----|------|-----|---|---|------|-----|----|---|---|----|---|---|------|-----|
| ST12Civ@14.asc | ST12Civ | qfs | 3 | NA | NA | 800 | 0 | 10  | 150  | 100 | 0 | 0 | NA   | NA  | NA | 0 | 0 | 2  | 0 | 0 | 65   | 122 |
| ST12Civ@15.asc | ST12Civ | qfs | 3 | NA | NA | 800 | 1 | 3   | 280  | 100 | 0 | 0 | NA   | NA  | NA | 0 | 0 | 2  | 0 | 0 | 50   | 167 |
| ST12Civ@16.asc | ST12Civ | qfs | 3 | NA | NA | 800 | 0 | 16  | 115  | 30  | 0 | 0 | NA   | NA  | NA | 0 | 0 | 1  | 0 | 0 | 255  | 59  |
| ST12Civ@17.asc | ST12Civ | qfs | 3 | NA | NA | 800 | 0 | 5   | 44   | 18  | 0 | 0 | NA   | NA  | NA | 0 | 1 | 2  | 0 | 0 | 37.5 | 28  |
| ST12Civ@18.asc | ST12Civ | qfs | 3 | NA | NA | 800 | 1 | 3   | 85   | 40  | 0 | 0 | NA   | NA  | NA | 0 | 0 | 3  | 0 | 0 | 50   | 58  |
| ST12Civ@19.asc | ST12Civ | qfs | 3 | NA | NA | 800 | 0 | 30  | 270  | 65  | 0 | 0 | NA   | NA  | NA | 0 | 0 | 3  | 0 | 0 | 40   | 132 |
| ST12Civ@20.asc | ST12Civ | qfs | 3 | NA | NA | 800 | 0 | 5   | 150  | 65  | 0 | 0 | NA   | NA  | NA | 0 | 0 | 3  | 0 | 0 | 40   | 99  |
| ST12Civ@21.asc | ST12Civ | qfs | 3 | NA | NA | 800 | 0 | 28  | 700  | 250 | 0 | 0 | 100  | 50  | 0  | 0 | 0 | 1  | 0 | 0 | 215  | 418 |
| ST12Civ@22.asc | ST12Civ | qfs | 3 | NA | NA | 800 | 0 | 6   | 240  | 160 | 1 | 0 | NA   | NA  | NA | 0 | 1 | 3  | 0 | 0 | 60   | 196 |
| ST12Civ@23.asc | ST12Civ | qfs | 3 | NA | NA | 800 | 0 | 8   | 70   | 40  | 0 | 0 | NA   | NA  | NA | 0 | 0 | 2  | 0 | 0 | 8    | 53  |
| ST12Civ@24.asc | ST12Civ | qfs | 3 | NA | NA | 800 | 0 | 10  | 290  | 100 | 2 | 0 | NA   | NA  | NA | 0 | 0 | 2  | 0 | 0 | 50   | 170 |
| ST12Civ@25.asc | ST12Civ | qfs | 3 | NA | NA | 800 | 0 | 50  | 160  | 100 | 0 | 0 | NA   | NA  | NA | 0 | 0 | 2  | 0 | 0 | 50   | 126 |
| ST12Civ@26.asc | ST12Civ | qfs | 3 | NA | NA | 800 | 0 | 5   | 70   | 50  | 0 | 0 | NA   | NA  | NA | 0 | 0 | 3  | 0 | 0 | 26   | 59  |
| ST12Civ@27.asc | ST12Civ | qfs | 3 | NA | NA | 800 | 0 | 10  | 40   | 20  | 0 | 0 | NA   | NA  | NA | 0 | 0 | 3  | 0 | 0 | 64   | 28  |
| ST12Civ@28.asc | ST12Civ | qfs | 3 | NA | NA | 800 | 0 | 5   | 24   | 16  | 0 | 0 | NA   | NA  | NA | 0 | 0 | 3  | 0 | 0 | 40   | 20  |
| ST12Civ@31.asc | ST12Civ | qfs | 3 | NA | NA | 800 | 0 | 6   | 18   | 10  | 0 | 0 | NA   | NA  | NA | 0 | 0 | 3  | 0 | 0 | 6    | 13  |
| ST12Civ@32.asc | ST12Civ | qfs | 3 | NA | NA | 800 | 1 | 2   | 24   | 10  | 0 | 0 | NA   | NA  | NA | 0 | 0 | 3  | 0 | 0 | 8    | 15  |
| ST12Civ@33.asc | ST12Civ | qfs | 3 | NA | NA | 800 | 0 | 14  | 270  | 40  | 0 | 0 | NA   | NA  | NA | 0 | 0 | 1  | 0 | 0 | 64   | 104 |
| ST12Civ@34.asc | ST12Civ | qfs | 3 | NA | NA | 800 | 0 | 5   | 270  | 40  | 0 | 0 | NA   | NA  | NA | 0 | 0 | 1  | 0 | 0 | 95   | 104 |
| ST12Civ@36.asc | ST12Civ | qfs | 3 | NA | NA | 800 | 0 | 6   | 46   | 30  | 0 | 0 | NA   | NA  | NA | 0 | 0 | 3  | 0 | 0 | 155  | 37  |
| ST12Civ@37.asc | ST12Civ | qfs | 3 | NA | NA | 800 | 1 | 1   | 32   | 30  | 0 | 0 | NA   | NA  | NA | 0 | 0 | 3  | 0 | 0 | 175  | 31  |
| ST12Civ@38.asc | ST12Civ | qfs | 3 | NA | NA | 800 | 1 | 1   | 50   | 35  | 0 | 0 | NA   | NA  | NA | 0 | 0 | 3  | 0 | 0 | 165  | 42  |
| ST12Civ@39.asc | ST12Civ | qfs | 3 | NA | NA | 800 | 0 | 12  | 60   | 50  | 0 | 0 | NA   | NA  | NA | 0 | 0 | 3  | 0 | 0 | 200  | 55  |
| ST12Civ@40.asc | ST12Civ | qfs | 3 | NA | NA | 800 | 1 | 2   | 44   | 24  | 0 | 0 | NA   | NA  | NA | 0 | 0 | 3  | 0 | 0 | 110  | 32  |
| ST12Civ@42.asc | ST12Civ | qfs | 3 | NA | NA | 800 | 1 | 1   | 65   | 30  | 0 | 0 | NA   | NA  | NA | 0 | 0 | 3  | 0 | 0 | 145  | 44  |
| ST12Civ@43.asc | ST12Civ | qfs | 3 | NA | NA | 800 | 1 | 1   | 60   | 25  | 0 | 0 | NA   | NA  | NA | 0 | 0 | 3  | 0 | 0 | 175  | 39  |
| ST12Civ@44.asc | ST12Civ | qfs | 3 | NA | NA | 800 | 1 | 2   | 85   | 30  | 0 | 0 | NA   | NA  | NA | 0 | 0 | 3  | 0 | 0 | 165  | 50  |
| ST12Civ@45.asc | ST12Civ | qfs | 3 | NA | NA | 800 | 1 | 4   | 240  | 60  | 0 | 0 | NA   | NA  | NA | 0 | 0 | 1  | 0 | 0 | 65   | 120 |
| ST12Civ@46.asc | ST12Civ | qfs | 3 | NA | NA | 800 | 1 | 3   | 50   | 25  | 0 | 0 | NA   | NA  | NA | 0 | 0 | 3  | 0 | 0 | 225  | 35  |
| ST12Civ@47.asc | ST12Civ | qfs | 3 | NA | NA | 800 | 1 | 2   | 200  | 30  | 0 | 0 | NA   | NA  | NA | 0 | 0 | 3  | 0 | 0 | 225  | 77  |
| ST12Civ@48.asc | ST12Civ | qfs | 3 | NA | NA | 800 | 0 | 6   | 200  | 45  | 1 | 0 | NA   | NA  | NA | 0 | 0 | 1  | 0 | 0 | 225  | 95  |
| ST12Civ@49.asc | ST12Civ | qfs | 3 | NA | NA | 800 | 1 | 2   | 20   | 10  | 0 | 0 | NA   | NA  | NA | 0 | 0 | 3  | 0 | 0 | 245  | 14  |
| ST12Civ@50.asc | ST12Civ | qfs | 3 | NA | NA | 800 | 1 | 3   | 18   | 15  | 0 | 0 | NA   | NA  | NA | 0 | 0 | 3  | 0 | 0 | 215  | 16  |
| ST12Civ@51.asc | ST12Civ | qfs | 3 | NA | NA | 800 | 1 | 2   | 30   | 15  | 0 | 0 | NA   | NA  | NA | 0 | 0 | 3  | 0 | 0 | 36   | 21  |
| ST12Civ@52.asc | ST12Civ | qfs | 3 | NA | NA | 800 | 1 | 2   | 14   | 10  | 0 | 0 | NA   | NA  | NA | 0 | 0 | 3  | 0 | 0 | 85   | 12  |
| ST12Civ@53.asc | ST12Civ | qfs | 3 | NA | NA | 800 | 1 | 1   | 50   | 24  | 0 | 0 | NA   | NA  | NA | 0 | 0 | 3  | 0 | 0 | 35   | 35  |
| ST12Civ@54.asc | ST12Civ | qfs | 3 | NA | NA | 800 | 0 | 8   | 105  | 30  | 1 | 0 | NA   | NA  | NA | 0 | 0 | 3  | 0 | 0 | 155  | 56  |
| ST12Civ@55.asc | ST12Civ | qfs | 3 | NA | NA | 800 | 1 | 2   | 22   | 12  | 0 | 0 | NA   | NA  | NA | 0 | 0 | 3  | 0 | 0 | 6    | 16  |
| ST12Civ@56.asc | ST12Civ | qfs | 3 | NA | NA | 800 | 1 | 1   | 50   | 20  | 0 | 0 | NA   | NA  | NA | 0 | 0 | 3  | 0 | 0 | 160  | 32  |
| ST12Civ@57.asc | ST12Civ | qfs | 3 | NA | NA | 800 | 1 | 1   | 20   | 20  | 0 | 0 | NA   | NA  | NA | 0 | 0 | 3  | 0 | 0 | 12   | 20  |
| ST12Civ@58.asc | ST12Civ | qfs | 3 | NA | NA | 800 | 0 | 16  | 150  | 55  | 0 | 0 | NA   | NA  | NA | 0 | 0 | 1  | 0 | 0 | 18   | 91  |
| ST12Civ@59.asc | ST12Civ | qfs | 3 | NA | NA | 800 | 0 | 8   | 120  | 95  | 2 | 2 | 75   | 40  | 8  | 0 | 0 | 1  | 0 | 0 | 140  | 107 |
| ST12Civ@60.asc | ST12Civ | qfs | 3 | NA | NA | 800 | 1 | 1   | 30   | 20  | 0 | 0 | NA   | NA  | NA | 0 | 0 | 3  | 0 | 0 | 90   | 24  |
| ST12Civ@61.asc | ST12Civ | qfs | 3 | NA | NA | 800 | 0 | 6   | 52   | 32  | 2 | 3 | 40   | 10  | 2  | 0 | 0 | 3  | 0 | 1 | 185  | 41  |
| ST12Civ@62.asc | ST12Civ | qfs | 3 | NA | NA | 800 | 0 | 8   | 34   | 34  | 0 | 0 | NA   | NA  | NA | 0 | 0 | 3  | 0 | 0 | 160  | 34  |
| ST12Civ@63.asc | ST12Civ | qfs | 3 | NA | NA | 800 | 1 | 2   | 30   | 28  | 0 | 0 | NA   | NA  | NA | 0 | 0 | 3  | 0 | 0 | 160  | 29  |
| ST12Civ@64.asc | ST12Civ | qfs | 3 | NA | NA | 800 | 1 | 1   | 45   | 30  | 0 | 0 | NA   | NA  | NA | 0 | 0 | 3  | 0 | 0 | 16   | 37  |
| ST12Civ@65.asc | ST12Civ | qfs | 3 | NA | NA | 800 | 0 | 5   | 34   | 20  | 0 | 0 | NA   | NA  | NA | 0 | 1 | 3  | 0 | 0 | 96   | 26  |
| ST12Civ@66.asc | ST12Civ | qfs | 3 | NA | NA | 800 | 1 | 4   | 34   | 20  | 0 | 0 | NA   | NA  | NA | 0 | 0 | 3  | 0 | 0 | 140  | 26  |
| ST12Civ@67.asc | ST12Civ | qfs | 3 | NA | NA | 800 | 0 | 25  | 100  | 85  | 2 | 0 | NA   | NA  | NA | 0 | 0 | 2  | 0 | 0 | 145  | 92  |
| ST12Civ@68.asc | ST12Civ | qfs | 3 | NA | NA | 800 | 0 | 10  | 185  | 35  | 0 | 0 | NA   | NA  | NA | 0 | 0 | 3  | 0 | 0 | 240  | 80  |
| ST12Civ@69.asc | ST12Civ | qfs | 3 | NA | NA | 800 | 0 | 6   | 120  | 100 | 0 | 2 | 100  | 30  | 6  | 0 | 0 | 3  | 0 | 0 | 240  | 110 |
| ST12Civ@70.asc | ST12Civ | qfs | 3 | NA | NA | 800 | 0 | 15  | 2920 | 140 | 3 | 2 | NA   | NA  | NA | 0 | 0 | NA | 0 | 0 | 50   | 639 |
| ST12Civ@71.asc | ST12Civ | qfs | 3 | NA | NA | 800 | 0 | 25  | 2920 | 140 | 3 | 2 | NA   | NA  | NA | 0 | 0 | NA | 0 | 0 | 60   | 639 |
| ST12Civ@72.asc | ST12Civ | qfs | 3 | NA | NA | 800 | 0 | 5   | 70   | 40  | 0 | 0 | NA   | NA  | NA | 0 | 0 | 1  | 0 | 0 | 70   | 53  |
| ST12Civ@73.asc | ST12Civ | qfs | 3 | NA | NA | 800 | 0 | 30  | 2920 | 140 | 3 | 2 | NA   | NA  | NA | 0 | 0 | NA | 0 | 0 | 170  | 639 |
| ST12Civ@74.asc | ST12Civ | qfs | 3 | NA | NA | 800 | 0 | 8   | 70   | 40  | 0 | 0 | NA   | NA  | NA | 0 | 0 | 2  | 0 | 0 | 170  | 53  |
| ST12Civ@75.asc | ST12Civ | qfs | 3 | NA | NA | 800 | 0 | 8   | 80   | 40  | 0 | 0 | NA   | NA  | NA | 0 | 0 | 2  | 0 | 0 | 235  | 57  |
| ST12Civ@76.asc | ST12Civ | qfs | 3 | NA | NA | 800 | 0 | 30  | 2920 | 140 | 3 | 2 | 2370 | 140 | 30 | 0 | 0 | NA | 0 | 0 | 75   | 639 |
| ST12Civ@77.asc | ST12Civ | qfs | 3 | NA | NA | 800 | 0 | 40  | 2920 | 140 | 3 | 2 | 2370 | 140 | 40 | 0 | 0 | NA | 0 | 1 | 45   | 639 |
| ST12Civ@78.asc | ST12Civ | qfs | 3 | NA | NA | 800 | 0 | 35  | 2920 | 140 | 3 | 2 | 2370 | 140 | 35 | 0 | 0 | NA | 0 | 0 | 30   | 639 |
| ST12Civ@79.asc | ST12Civ | qfs | 3 | NA | NA | 800 | 0 | 20  | 2920 | 140 | 3 | 2 | 2370 | 140 | 20 | 0 | 0 | NA | 0 | 0 | 110  | 639 |
| ST12Civ@80.asc | ST12Civ | qfs | 3 | NA | NA | 800 | 0 | 38  | 2920 | 140 | 3 | 2 | 2370 | 140 | 38 | 0 | 0 | NA | 0 | 0 | 75   | 639 |
| ST12Civ@81.asc | ST12Civ | qfs | 3 | NA | NA | 800 | 0 | 10  | 2920 | 140 | 3 | 2 | 2370 | 140 | 10 | 1 | 0 | NA | 0 | 0 | 100  | 639 |
| ST12Civ@82.asc | ST12Civ | qfs | 3 | NA | NA | 800 | 0 | 8   | 110  | 50  | 0 | 0 | NA   | NA  | NA | 0 | 0 | 3  | 0 | 0 | 150  | 74  |
| ST12Civ@83.asc | ST12Civ | qfs | 3 | NA | NA | 800 | 0 | 12  | 140  | 65  | 0 | 0 | NA   | NA  | NA | 0 | 0 | 3  | 0 | 0 | 140  | 95  |
| ST12Civ@85.asc | ST12Civ | qfs | 3 | NA | NA | 800 | 1 | 2   | 60   | 20  | 0 | 0 | NA   | NA  | NA | 0 | 0 | 3  | 0 | 0 | 220  | 35  |
| ST12Civ@86.asc | ST12Civ | qfs | 3 | NA | NA | 800 | 0 | 7.5 | 50   | 25  | 2 | 0 | NA   | NA  | NA | 0 | 0 | 3  | 0 | 0 | 185  | 35  |
| ST12Civ@87.asc | ST12Civ | qfs | 3 | NA | NA | 800 | 1 | 1   | 110  | 35  | 0 | 0 | NA   | NA  | NA | 0 | 0 | 3  | 0 | 0 | 160  | 62  |
| ST12Civ@88.asc | ST12Civ | qfs | 3 | NA | NA | 800 | 0 | 5   | 85   | 35  | 0 | 1 | 40   | 15  | 5  | 0 | 0 | 3  | 0 | 0 | 165  | 55  |
| ST12Civ@89.asc | ST12Civ | qfs | 3 | NA | NA | 800 | 1 | 4   | 450  | 90  | 0 | 1 | 450  | 40  | 4  | 0 | 0 | 1  | 0 | 0 | 200  | 201 |
| ST12Civ@90.asc | ST12Civ | qfs | 3 | NA | NA | 800 | 0 | 5   | 100  | 30  | 0 | 0 | NA   | NA  | NA | 0 | 0 | 3  | 0 | 0 | 195  | 55  |
| ST12Civ@91.asc | ST12Civ | qfs | 3 | NA | NA | 800 | 0 | 5   | 30   | 20  | 0 | 0 | NA   | NA  | NA | 0 | 0 | 3  | 0 | 0 | 210  | 24  |

|                 |         |     |   |    |    |     |   |    |      |     |    |    |      |     |    |   |   |    |   |   |     |     |
|-----------------|---------|-----|---|----|----|-----|---|----|------|-----|----|----|------|-----|----|---|---|----|---|---|-----|-----|
| ST12Civ@92.asc  | ST12Civ | qfs | 3 | NA | NA | 800 | 1 | 4  | 60   | 15  | 0  | 0  | NA   | NA  | NA | 0 | 0 | 3  | 0 | 0 | 240 | 30  |
| ST12Civ@93.asc  | ST12Civ | qfs | 3 | NA | NA | 800 | 0 | 25 | 250  | 75  | 1  | 1  | 110  | 25  | 4  | 0 | 0 | 1  | 0 | 0 | 260 | 137 |
| ST12Civ@95.asc  | ST12Civ | qfs | 3 | NA | NA | 800 | 1 | 1  | 100  | 20  | 0  | 0  | NA   | NA  | NA | 0 | 0 | 3  | 0 | 0 | 250 | 45  |
| ST12Civ@96.asc  | ST12Civ | qfs | 3 | NA | NA | 800 | 0 | 5  | 55   | 20  | 0  | 0  | NA   | NA  | NA | 0 | 0 | 3  | 0 | 0 | 200 | 33  |
| ST12Civ@97.asc  | ST12Civ | qfs | 3 | NA | NA | 800 | 1 | 2  | 24   | 15  | 0  | 0  | NA   | NA  | NA | 0 | 0 | 3  | 0 | 0 | 70  | 19  |
| ST12Civ@98.asc  | ST12Civ | qfs | 3 | NA | NA | 800 | 0 | 8  | 28   | 24  | 0  | 0  | NA   | NA  | NA | 0 | 0 | 2  | 0 | 0 | 144 | 26  |
| ST12Civ@99.asc  | ST12Civ | qfs | 3 | NA | NA | 800 | 0 | 15 | 36   | 32  | 0  | 0  | NA   | NA  | NA | 0 | 0 | 3  | 0 | 0 | 170 | 34  |
| ST12Civ@100.asc | ST12Civ | qfs | 3 | NA | NA | 800 | 1 | 4  | 20   | 20  | 0  | 0  | NA   | NA  | NA | 0 | 0 | 3  | 0 | 0 | 34  | 20  |
| ST12Civ@101.asc | ST12Civ | qfs | 3 | NA | NA | 800 | 0 | 12 | 34   | 20  | 0  | 0  | NA   | NA  | NA | 0 | 0 | 3  | 0 | 0 | 90  | 26  |
| ST12Civ@102.asc | ST12Civ | qfs | 3 | NA | NA | 800 | 1 | 4  | 35   | 25  | 0  | 0  | NA   | NA  | NA | 0 | 0 | 3  | 0 | 0 | 125 | 30  |
| ST12Civ@103.asc | ST12Civ | qfs | 3 | NA | NA | 800 | 1 | 2  | 30   | 30  | 0  | 0  | NA   | NA  | NA | 0 | 0 | 3  | 0 | 0 | 45  | 30  |
| ST12Civ@104.asc | ST12Civ | qfs | 3 | NA | NA | 800 | 1 | 2  | 56   | 24  | 1  | 0  | NA   | NA  | NA | 0 | 0 | 3  | 0 | 0 | 70  | 37  |
| ST12Civ@105.asc | ST12Civ | qfs | 3 | NA | NA | 800 | 1 | 1  | 65   | 24  | 0  | 0  | NA   | NA  | NA | 0 | 0 | 3  | 0 | 0 | 55  | 39  |
| ST12Civ@106.asc | ST12Civ | qfs | 3 | NA | NA | 800 | 1 | 1  | 30   | 10  | 0  | 0  | NA   | NA  | NA | 0 | 1 | 3  | 0 | 0 | 70  | 17  |
| ST12Civ@107.asc | ST12Civ | qfs | 3 | NA | NA | 800 | 0 | 5  | 50   | 24  | 0  | 0  | NA   | NA  | NA | 0 | 0 | 3  | 0 | 0 | 72  | 35  |
| ST12Civ@108.asc | ST12Civ | qfs | 3 | NA | NA | 800 | 0 | 6  | 52   | 28  | 0  | 0  | NA   | NA  | NA | 0 | 1 | 2  | 0 | 0 | 90  | 38  |
| ST12Civ@109.asc | ST12Civ | qfs | 3 | NA | NA | 800 | 2 | 2  | NA   | NA  | NA | NA | NA   | NA  | NA | 0 | 1 | 2  | 0 | 0 | 95  | NA  |
| ST12Civ@110.asc | ST12Civ | qfs | 3 | NA | NA | 800 | 0 | 20 | 2920 | 140 | 3  | 2  | 2370 | 140 | 20 | 0 | 0 | NA | 0 | 0 | 110 | 639 |
| ST12Civ@111.asc | ST12Civ | qfs | 3 | NA | NA | 800 | 0 | 40 | 2920 | 140 | 3  | 2  | 2370 | 140 | 40 | 0 | 0 | NA | 0 | 0 | 135 | 639 |
| ST12Civ@112.asc | ST12Civ | qfs | 3 | NA | NA | 800 | 0 | 50 | 2920 | 140 | 3  | 2  | 2370 | 140 | 50 | 0 | 0 | NA | 0 | 0 | 125 | 639 |
| ST12Civ@113.asc | ST12Civ | qfs | 3 | NA | NA | 800 | 0 | 35 | 2920 | 140 | 3  | 2  | 2370 | 140 | 35 | 0 | 0 | NA | 0 | 0 | 115 | 639 |
| ST12Civ@114.asc | ST12Civ | qfs | 3 | NA | NA | 800 | 0 | 15 | 2920 | 140 | 3  | 2  | 2370 | 140 | 15 | 0 | 0 | NA | 0 | 0 | 115 | 639 |
| ST12Civ@115.asc | ST12Civ | qfs | 3 | NA | NA | 800 | 0 | 5  | 2920 | 140 | 3  | 2  | 2370 | 140 | 5  | 0 | 0 | NA | 0 | 0 | 115 | 639 |
| ST12Civ@116.asc | ST12Civ | qfs | 3 | NA | NA | 800 | 0 | 8  | 80   | 50  | 1  | 3  | 30   | 24  | 0  | 0 | 1 | 1  | 0 | 0 | 120 | 63  |
| ST12Civ@117.asc | ST12Civ | qfs | 3 | NA | NA | 800 | 0 | 6  | 240  | 40  | 0  | 0  | NA   | NA  | NA | 0 | 0 | 1  | 0 | 0 | 110 | 98  |
| ST12Civ@118.asc | ST12Civ | qfs | 3 | NA | NA | 800 | 0 | 16 | 240  | 60  | 1  | 3  | 60   | 60  | 16 | 0 | 1 | 2  | 0 | 0 | 105 | 120 |
| ST12Civ@119.asc | ST12Civ | qfs | 3 | NA | NA | 800 | 1 | 4  | 150  | 50  | 0  | 0  | NA   | NA  | NA | 0 | 0 | 2  | 0 | 0 | 115 | 87  |
| ST12Civ@120.asc | ST12Civ | qfs | 3 | NA | NA | 800 | 0 | 8  | 105  | 60  | 0  | 0  | NA   | NA  | NA | 0 | 0 | 2  | 0 | 0 | 110 | 79  |
| ST12Civ@121.asc | ST12Civ | qfs | 3 | NA | NA | 800 | 0 | 5  | 105  | 60  | 0  | 0  | NA   | NA  | NA | 0 | 1 | 2  | 0 | 0 | 110 | 79  |
| ST12Civ@122.asc | ST12Civ | qfs | 3 | NA | NA | 800 | 0 | 8  | 490  | 50  | 1  | 0  | NA   | NA  | NA | 0 | 0 | 1  | 0 | 0 | 105 | 157 |
| ST12Civ@123.asc | ST12Civ | qfs | 3 | NA | NA | 800 | 0 | 18 | 490  | 50  | 1  | 0  | NA   | NA  | NA | 0 | 0 | 1  | 0 | 0 | 120 | 157 |
| ST12Civ@124.asc | ST12Civ | qfs | 3 | NA | NA | 800 | 1 | 1  | 320  | 65  | 1  | 0  | NA   | NA  | NA | 0 | 1 | 2  | 0 | 0 | 60  | 144 |
| ST12Civ@125.asc | ST12Civ | qfs | 3 | NA | NA | 800 | 0 | 14 | 225  | 60  | 0  | 0  | NA   | NA  | NA | 0 | 0 | 1  | 0 | 0 | 50  | 116 |
| ST12Civ@126.asc | ST12Civ | qfs | 3 | NA | NA | 800 | 1 | 2  | 120  | 50  | 0  | 0  | NA   | NA  | NA | 0 | 1 | 2  | 0 | 0 | 35  | 77  |
| ST12Civ@127.asc | ST12Civ | qfs | 3 | NA | NA | 800 | 0 | 10 | 40   | 30  | 0  | 0  | NA   | NA  | NA | 0 | 1 | 3  | 0 | 0 | 18  | 35  |
| ST12Civ@130.asc | ST12Civ | qfs | 3 | NA | NA | 800 | 0 | 5  | 750  | 70  | 2  | 0  | NA   | NA  | NA | 0 | 0 | NA | 0 | 0 | 5   | 229 |
